# Supplementary material for: BRD4 Connects Enhancer Remodeling to Senescence Immune Surveillance
Source: Oxford University Press journal article supplement (doi:10.1158/2159-8290.cd-16-0217), 2016-04-21
Supplement: 21598290cd160217-sup-162675_1_supp_3432485_951dft.xlsx [file 21598290cd160217-sup-162675_1_supp_3432485_951dft.xlsx]

## Sheet: Table S3
A. Senescence-induced genes.
Gene	P_Ren_1	P_Ren_2	P_Ren_3	Q_Ren_1	Q_Ren_2	Q_Ren_3	S_Ren_1	S_Ren_2	S_Ren_3	log2_SP
AADACP1	0	0	0	0	0	0	5.24796	6.78438	6.29465	#DIV/0!
AC005077.14	0	0	0	0	0.113113	0.0352636	1.32701	0.90454	0.810306	#DIV/0!
AC008063.3	0	0	0	0	0	0	0.899106	1.76111	0.816991	#DIV/0!
AC019172.2	0	0	0	0	0	0	3.88108	4.86528	4.93727	#DIV/0!
AC084809.2	0	0	0	0	0	0	1.2556	0.922273	1.19798	#DIV/0!
AC084809.3	0	0	0	0	0	0	3.98568	2.55498	2.17301	#DIV/0!
ACKR3	0	0	0	0	0.554459	1.03713	1.56114	2.1405	0.992994	#DIV/0!
ADAMTS18	0	0	0	0	0	0	1.59469	1.87414	1.15924	#DIV/0!
AREG	0	0	0	0.617712	0.318814	0.298176	5.68515	4.30776	3.5074	#DIV/0!
ATP6V0D2	0	0	0	0	0	0.275103	4.96917	7.29995	5.64417	#DIV/0!
BEAN1	0	0	0	0	0.0994289	0	1.21313	0.82253	1.01754	#DIV/0!
C4orf26	0	0	0	0	0	0	53.1177	49.3818	40.1981	#DIV/0!
CCAT1	0	0	0	0	0	0.11567	2.52461	1.68814	1.6612	#DIV/0!
CD69	0	0	0	0	0.235877	0.0735359	3.20999	2.34156	1.7501	#DIV/0!
CES1P1	0	0	0	0	0	0	2.41653	3.82309	2.93904	#DIV/0!
CRCT1	0	0	0	0	0	0	6.62555	6.22929	8.52495	#DIV/0!
CSF2	0	0	0	0	0	0	45.7306	41.832	44.0816	#DIV/0!
CSF3	0	0	0	0	0	0	154.756	143.656	137.478	#DIV/0!
CST2	0	0	0	0	0	0	0.744046	0.437216	0.811312	#DIV/0!
CST4	0	0	0	0.339975	0.263202	0	26.4316	28.0152	24.3768	#DIV/0!
CSTA	0	0	0	0	0	0.164109	1.48215	0.725783	1.75082	#DIV/0!
CTC-347C20.2	0	0	0	0.486326	0	0	1.76681	1.24586	2.69716	#DIV/0!
CTD-2547L24.3	0	0	0	0	0	0	2.75713	3.93464	3.00639	#DIV/0!
CXCR4	0	0	0	0	0	0	6.16753	7.13328	6.45824	#DIV/0!
CYP3A7	0	0	0	0.8827	0.854212	0.639133	7.61624	9.51623	9.00413	#DIV/0!
FBXL21	0	0	0	0.866964	1.00678	0.209246	1.57483	3.14637	1.37377	#DIV/0!
FRG2FP	0	0	0	0	0	0	3.59907	8.45953	7.13534	#DIV/0!
GAPLINC	0	0	0	0	0.322455	0.201054	1.21054	1.06701	0.65999	#DIV/0!
GDA	0	0	0	0	0.111612	0	1.46653	0.923314	0.856664	#DIV/0!
IL1RN	0	0	0	0	0	0	1.85516	3.27038	3.23659	#DIV/0!
IL24	0	0	0	0	0	0.0933683	3.23247	2.14722	2.06884	#DIV/0!
IL36RN	0	0	0	0	0	0	1.73574	2.44789	2.38475	#DIV/0!
IRG1	0	0	0	0	0	0	1.4567	1.25881	1.26137	#DIV/0!
ISLR2	0	0	0	0	0	0.21891	1.31805	1.16177	2.51511	#DIV/0!
ITGAX	0	0	0	0	0	0.226555	13.6408	15.6305	13.5726	#DIV/0!
LCE1E	0	0	0	0	0	0	2.90372	3.60216	2.81443	#DIV/0!
LCE1F	0	0	0	0	0	0	417.28	383.834	416.757	#DIV/0!
LCE2B	0	0	0	0	0	0	21.5222	16.2094	18.8405	#DIV/0!
LCE2C	0	0	0	0	0	0	112.699	110.966	105.262	#DIV/0!
LCE2D	0	0	0	0	0	0	16.7543	12.1722	13.2865	#DIV/0!
LCE3D	0	0	0	0	0	0	39.04	46.237	50.4893	#DIV/0!
LCP1	0	0	0	0	0	0	1.17594	1.29909	0.794992	#DIV/0!
LINC00302	0	0	0	0	0	0	0	1.44388	1.00474	#DIV/0!
LL0XNC01-131B10.2	0	0	0	0	0.254068	0.158414	0.476904	1.40119	1.43005	#DIV/0!
MMP9	0	0	0	0	0	0	1.19124	1.39999	0.995848	#DIV/0!
MT-TC	0	0	0	0	0	0	2.81084	0	3.06495	#DIV/0!
OR8D1	0	0	0	0	0	0	1.2657	0.956251	0.887224	#DIV/0!
PCAT1	0	0	0	0	0	0	0.758238	2.3763	1.10238	#DIV/0!
PF4	0	0	0	0	0	0	0.921435	0.902422	1.50711	#DIV/0!
PHF24	0	0	0	0	0.631517	0.393758	2.96351	2.43798	3.55456	#DIV/0!
PI3	0	0	0	0	0	0	32.7948	34.9521	35.409	#DIV/0!
PIK3CG	0	0	0	0.0666983	0	0	1.21157	1.42388	1.13615	#DIV/0!
PPBP	0	0	0	0	0	0	2.33516	2.43944	2.82919	#DIV/0!
PRSS22	0	0	0	0	0.142615	0	0.401549	0.471916	0.2919	#DIV/0!
RHCG	0	0	0	0	0.106157	0	1.69375	2.57602	1.73823	#DIV/0!
RP11-1149M10.2	0	0	0	0	0	0	0.904954	0.797653	0.986766	#DIV/0!
RP11-114H23.3	0	0	0	0	0	0.813506	3.06131	1.07933	3.00426	#DIV/0!
RP11-180C1.1	0	0	0	0	0	0	5.62168	5.40558	8.08034	#DIV/0!
RP11-400N13.3	0	0	0	0	0	0	26.738	21.337	24.836	#DIV/0!
RP11-436F23.1	0	0	0	0	0	0	1.01375	2.38279	2.76348	#DIV/0!
RP11-455B3.1	0	0	0	0	0	0.466841	0.70271	1.23878	2.29872	#DIV/0!
RP11-495P10.9	0	0	0	0	0	0.432443	0.650932	1.53	0.35489	#DIV/0!
RP11-753N8.1	0	0	0	0	0	0	9.04954	11.0152	10.5725	#DIV/0!
RP11-881M11.4	0	0	0	0	0	0	0.214717	0.883204	0.81945	#DIV/0!
RP13-143G15.4	0	0	0	0	0	0	5.73759	5.24459	3.82329	#DIV/0!
RP6-65G23.3	0	0	0	0	1.07426	1.00472	3.52883	3.25853	1.09939	#DIV/0!
SAA1	0	0	0	0.415156	0.321406	0.2004	3.92147	3.89964	3.45368	#DIV/0!
SAA2	0	0	0	0	0	0	2.35979	2.87998	1.48449	#DIV/0!
SERPINB4	0	0	0	0.145981	0	0	11.4555	11.1568	10.0045	#DIV/0!
SLC22A15	0	0	0	0	0	0	0.864691	1.1086	1.09286	#DIV/0!
SNURF	0	0	0	0	0	0	0	0	0	#DIV/0!
SOX17	0	0	0	0	0	0	1.66346	1.3964	1.12286	#DIV/0!
SPRR2A	0	0	0	0	0	0	2.61658	1.69131	0.855939	#DIV/0!
SPRR2D	0	0	0	0	0	0	0.544034	1.91811	2.66948	#DIV/0!
TBX21	0	0	0	0	0	0	1.29832	1.9073	1.92692	#DIV/0!
TMEM108-AS1	0	0	0	0	0	0	4.21028	5.72123	6.3125	#DIV/0!
TNP1	0	0	0	0	0	0	5.46974	3.21413	3.72765	#DIV/0!
TREM1	0	0	0	0.44481	0	0.429429	11.3119	14.6236	8.6342	#DIV/0!
TSPAN19	0	0	0	0	0.513415	0.32012	1.44558	1.6989	3.41524	#DIV/0!
TUBB3	0	0	0	0	0	0	0	0	0	#DIV/0!
IL1B	0.151232	0.117402	0.28737	0.62617	1.33312	0.755648	2213.45	2166.89	2190.8	13.5288
TNFSF15	0.0184432	0.028635	0	0.954542	1.80313	2.19325	119.627	115.729	117.827	12.8731
CXCL5	0.242967	0.37723	0.138505	0.502996	1.63552	1.01977	620.066	603.865	549.475	11.1907
IL1A	0	0	0.0551673	0.120208	0.0930625	0.0580255	38.9548	39.417	36.524	11.0242
IVL	0	0.0889374	0	0	0	0	37.3099	33.2152	36.6898	10.2354
MMP10	0.0701535	0	0.0666526	0.726169	0.337312	0.771165	46.2206	47.0652	44.2431	9.97339
CXCL8	1.15735	0.89845	1.03087	5.39094	12.5207	10.4813	1067.72	1028.3	968.308	9.95531
CXCL3	0.114725	0	0.218001	0.950032	2.20649	2.4076	111.309	109.215	108.388	9.94916
CXCL2	0	0	0.096203	0.209623	0.973718	2.22612	24.6745	22.2858	24.1648	9.53006
SERPINA9	0	0.125975	0	0	0	0	31.1227	29.6916	28.0141	9.46174
CCL20	0	0.228227	0	0.304316	0	0.146896	56.3843	53.5318	47.7388	9.43209
MRGPRX3	0	0	0.0714919	0	0	0	17.431	16.7609	14.9957	9.4263
FOXQ1	0.0719125	0	0.0683238	0.148875	0.806795	0.215591	21.0936	23.2645	23.2954	8.91416
CXCL1	1.0743	1.00078	0.408276	33.3608	55.7869	50.6726	355.841	327.038	309.95	8.64311
GS1-600G8.5	0.164769	0.255821	0.0782734	0	0.396122	0.0823287	60.7232	59.5674	58.7132	8.48713
MMP3	4.89404	6.64869	7.67219	0.506589	2.94144	2.8733	2315.72	2255.47	2295.95	8.48134
RP11-59D5__B.2	0	0	0.0805882	0	0.543782	0.678108	6.88985	7.27251	9.73871	8.21229
THBD	0.120058	0.0932014	0.0570335	0.124274	0.288632	0.419919	26.1862	24.9649	26.5105	8.16653
LCE2A	0.416655	0.32345	0.989656	0	0	0	170.474	156.337	159.916	8.1364
HPSE	0	0	0.0253901	0.110648	0.0428309	0	2.29131	2.50387	2.14779	8.09514
KCNJ15	0.197013	0.305882	0	0.407861	1.26303	0.590636	49.7869	45.7992	40.2312	8.0772
EHF	0.973017	1.13303	0.231115	0	0.779742	0	185.881	172.012	168.174	7.81434
CXCL6	0	0	0.0682045	0.891692	1.72583	2.15214	5.39917	4.69554	4.1211	7.70341
BCL2A1	0.35817	0	0.113432	0	0.57405	0.357927	27.2975	30.6037	30.5487	7.55115
TMEM156	0.191209	0.197914	0.121111	0.395847	1.22583	0.573238	29.8167	29.4081	30.4215	7.45694
OLAH	0.172008	0	0	0.356096	0	0.515674	8.79711	9.27444	8.74602	7.28456
IL33	0	0	0.0443678	0.193352	0.299379	0.373332	2.17758	2.06385	2.37444	7.22027
SLC16A6	0.745098	0.704164	0.861809	1.67665	2.4403	2.97837	116.416	110.301	108.609	7.18086
SERPIND1	0	0	0.0480818	0	0	0.151719	2.05536	2.59447	2.19967	7.15437
FER1L6	0.0203817	0.0316447	0.0580939	0.0421948	0.0653329	0.0203679	4.78275	4.86422	5.34886	7.08934
AC003092.1	0.386009	0.299659	0.183373	0.799127	0	0.192873	38.9031	35.314	35.4556	6.97956
TAGLN3	0.947962	0.883085	0.540393	0.19625	0.151933	0.0947318	89.4068	87.1431	87.072	6.79656
RPLP0P2	0.384859	0.380248	0.26593	0.144863	0.280375	0.349634	38.8925	36.987	38.535	6.79403
WNT7B	0.0944092	0.14658	0.0896979	0	0.100875	0	12.0237	11.5995	12.6462	6.77714
TMCC3	0.0629555	0.0325816	0.0199379	0.0434441	0.0336336	0	3.81953	3.95094	4.04436	6.67687
SHH	0	0.0429911	0	0.114648	0.0443791	0.0553418	1.41615	1.46851	1.45334	6.65685
SNCB	0.0891756	0.138454	0	0	0	0.267345	7.3777	6.46351	7.16707	6.52812
CTC-231O11.1	0.0535984	0	0	0	0	0	0.644991	2.60569	1.53847	6.48144
CST1	0.162276	0.5039	0.308356	0	2.08068	0.648664	27.8273	28.4007	28.2137	6.4371
CTSS	0.240233	0.13987	0.228245	1.36768	1.49199	1.44042	16.1259	17.3061	17.4114	6.38502
GJB2	0.109627	0.0851032	0	0.113476	0.263553	0.492985	4.69973	5.47486	5.16956	6.30007
ZPLD1	0.112681	0	0	0	0	0	3.30521	3.28681	2.26406	6.29635
MCTP1	0.453181	0.201031	0.184528	1.34027	2.3865	1.7468	22.2034	20.3147	22.5117	6.27673
DGAT2	0.660401	0.769005	0.784306	0.341795	0.529223	0.164988	48.4277	58.3736	54.566	6.18774
GRIP1	0	0	0.0479441	0	0	0	1.06269	1.36043	0.972534	6.14619
TMEM151B	0.0503901	0	0.0239378	0.0521596	0.0807619	0.151068	1.44016	1.8707	1.8803	6.12601
LINC00520	0.29156	0	0.27701	0	0	0	9.64856	14.1742	15.0639	6.09579
DUSP4	0.579118	0.657064	0.656029	2.49004	2.46322	2.20361	45.1308	42.5852	41.0639	6.08869
HEPHL1	0.0692216	0.0358245	0	0	0.0739625	0	2.60312	2.5902	1.8923	6.0758
CYP26B1	0.0781888	0	0.123812	0.8633	0.584807	0.286498	4.58692	4.40013	4.42449	6.05297
SERPINB2	25.1132	24.5695	20.9183	8.19021	12.9571	10.8292	1584.51	1539.56	1563.28	6.05294
G0S2	0.142413	0.442222	0.270613	0	0.22825	0.284633	16.495	20.015	19.9718	6.0453
CES1	0.374294	0.290565	0	0	0	0	14.6386	13.8954	14.8876	6.02922
DCSTAMP	0.432736	0.671867	0	0	0.34678	0	22.1317	23.9063	25.3746	6.01458
CBLN2	0	0.0795853	0.146104	0	0	0.0512245	4.93474	4.98395	4.62418	6.00983
LONRF3	0	0.0661424	0	0	0	0	1.21755	1.24263	1.7818	6.00302
ADGRE2	0.0182252	0.113186	0.0173157	0	0	0.0364256	3.31718	2.65806	3.34803	5.9701
BEX1	0.285486	0.443246	0.542478	0.29551	0.228779	0.285292	25.766	27.0008	23.1787	5.90069
ZSWIM5	0.0211943	0.0329064	0	0.175509	0.135875	0.16944	1.14772	0.992897	1.07766	5.89449
BMP2	1.5412	1.06349	1.82222	11.4154	16.1381	17.763	86.9105	80.7075	81.3979	5.81379
COL10A1	0.176286	0.109481	0.267982	0.0729906	0.113016	0.0352333	10.1827	9.84791	11.0165	5.80908
SLC6A15	1.69361	2.15854	1.80122	11.4604	16.2459	16.0152	106.275	101.282	104.543	5.78676
GPR68	0.17255	0.334876	0.450832	0.357217	0.345688	0.474189	17.6496	17.0058	18.2193	5.78602
IL13RA2	0.740967	0.511301	0.469327	0.340883	1.18757	1.8923	31.7036	30.1277	30.5861	5.74635
RP11-95M15.2	0	0	0.0658658	0	0	0	1.45993	0.674052	1.3645	5.73106
TNIP3	0.102094	0	0	0	0	0	1.99644	1.39875	1.75829	5.65757
VNN1	0.079414	0	0.188627	0	0.190919	0.03968	4.77825	4.77325	3.41921	5.59666
MRGPRX4	0	0	0.0811463	0	0	0	1.67015	0.905922	1.33084	5.58936
PAPPA2	0.0564568	0.0438275	0.0268197	0	0.0452425	0.0846277	2.12309	2.07097	1.89832	5.58292
AC004988.1	0.0696385	0	0	0	0.111612	0.0695913	1.04752	0.738651	1.48488	5.55373
PTGS2	1.80323	1.44227	1.40174	3.39372	4.55408	2.83952	73.1541	66.9677	66.7493	5.47621
ASB2	0.0867909	0.0673759	0.0824597	0.179677	0.208654	0.086732	3.98186	2.9919	3.5233	5.47123
ABCG1	0.079083	0	0.0375682	0.818599	0.887241	0.632234	2.08177	1.6427	1.0377	5.35135
NKAIN1	0.0952722	0	0	0	0	0	1.14648	1.34739	1.172	5.26596
GABRA2	3.00099	1.85251	1.99243	7.56008	10.1411	11.1648	88.434	85.5227	85.3982	5.24354
SERPINA1	0.156908	0.182712	0.186347	0	0.0628704	0.0392004	5.90062	7.00399	6.94879	5.23827
RP11-787B4.2	0	0	0.230207	0	0.776678	0.484268	2.55129	2.99838	2.98065	5.2116
PSG7	0	0.0766542	0.0938153	0	0	0	1.85664	1.87652	2.42939	5.17594
XIRP2	0.074927	0.116332	0.0711879	0	0	0.0374381	3.32485	3.11275	2.91878	5.15586
TNFSF8	0	0.365424	0	0	0	0	3.89441	5.40902	3.08835	5.08367
STC1	23.44	25.6427	24.6542	16.7672	28.0996	29.0738	845.976	797.929	837.879	5.07285
EREG	2.80356	3.35788	2.91733	3.64823	5.77717	6.75065	103.22	94.1205	100.662	5.03668
GPR183	0	0.112637	0.0689266	0	0	0	1.41865	1.85963	2.43934	4.97687
LAPTM5	0.110958	0	0.0527104	0	0	0	1.75251	1.61827	1.72895	4.96157
MMP1	153.255	166.016	173.086	48.7313	51.0717	49.9241	5099.6	4990.01	5058.1	4.94325
RP11-396O20.2	0.124199	0	0	0	0	0.24823	1.12094	1.97606	0.712996	4.93906
ACPP	0.197328	0.674017	0.262473	4.73876	3.35239	3.19454	13.1197	10.4303	11.1015	4.93366
MYO1D	0.421224	0.413048	0.463393	0.321274	0.390852	0.443092	13.2058	12.4827	13.9452	4.93274
ESM1	0.966624	1.23594	1.02643	0.588569	1.09358	1.36372	36.5215	33.0707	28.8182	4.92965
CDCP1	3.94261	4.94168	4.29214	4.71872	6.4506	6.48448	139.461	128.543	133.326	4.92875
CCRL2	0	0.106616	0	0.284322	0.110058	0.343113	1.03294	1.09255	1.07	4.90554
NRROS	0.144302	0	0.182801	0.199158	0.0770923	0.144204	3.25593	3.23126	3.2347	4.89342
TTC9	0.07092	0	0.0224603	0.244701	0.303109	0.259863	1.03123	1.04478	0.678555	4.88257
TIE1	0.222388	0.197303	0.0905528	0	0.0509183	0.0317481	4.87444	5.19509	4.74192	4.85938
CTD-2066L21.2	0	0	0.275707	0	0	0	3.49206	2.565	1.90388	4.85173
MME	4.96949	5.56868	5.50157	30.0588	21.1932	20.3827	152.17	149.577	150.333	4.81685
MEDAG	0.727303	0.967896	0.987155	7.09823	8.24297	7.57959	24.9282	24.8883	24.8811	4.79949
TM4SF19	0	0.121038	0	0	0	0	1.28993	1.17144	0.895075	4.7934
GDF15	39.5007	48.7223	36.6955	84.047	100.239	81.5793	1191.99	1065.49	1133.64	4.7627
ARHGAP25	0.402053	0.156057	0.0954974	0.208086	0.80548	0.502225	5.59419	6.13029	5.85264	4.74913
TGFA	0.0286148	0.17771	0	0	0	0	1.72172	2.02344	1.78351	4.74394
QPCT	1.27656	2.31232	1.28024	2.78959	3.06897	3.61446	43.7386	44.0062	39.6082	4.70903
TMEM154	0.161396	0.250584	0.230013	0.167064	0.184768	0.218889	5.84396	5.48222	5.28503	4.69345
IL6	1.85762	2.38255	2.22533	6.35376	7.50789	9.2818	52.9697	58.0401	53.5855	4.67002
RP11-114H23.1	0.16488	0.255992	0	0	1.05703	1.97721	2.48015	3.78921	4.19178	4.63552
KIF21B	0.0498454	0.0967375	0.0473579	0.103191	0.0599165	0.0498115	1.61204	1.52003	1.60448	4.61015
DNER	0.226987	0.528632	0.143773	0.156639	0.121267	0.378056	7.11332	7.59076	7.16692	4.60392
ICAM1	5.04393	3.82729	3.63921	15.5454	17.9308	19.6315	105.365	96.4755	97.629	4.58121
SCG5	3.78557	2.93874	2.17692	3.50602	3.99161	5.07718	66.384	69.7399	69.2809	4.52832
RP11-320H14.1	0.553877	0	0.350824	0.764434	1.77543	1.2915	7.7761	6.36451	6.51073	4.51265
FOLR3	0	0.25565	0.469327	0	0.263905	0	4.706	5.96731	5.6716	4.49476
NDP	0.538265	0.522319	0.70318	0.278583	0.431347	0.134475	13.2583	12.5486	13.5741	4.48077
POU2F2	1.17951	1.27636	1.76586	0.739954	1.14572	0.946536	32.5008	29.9662	29.5912	4.44664
ZG16B	0.296823	0.230424	0	0.614491	0.713591	1.48311	4.91136	3.67311	2.7994	4.43237
C15orf54	0.160273	0.0622099	0.0761373	0	0	0.040041	1.98896	2.08959	2.33307	4.4243
RP11-114H23.2	0.166213	0	0.157918	0.688197	0.532789	0.6644	2.00017	2.49759	2.04468	4.33518
MYCT1	0.203515	0.315977	0.193359	0	0	0.0406753	4.95933	4.46124	4.70668	4.30874
ABCA3	0.298574	0.173838	0.177297	0.540853	0.328992	0.447557	4.40701	3.99169	4.3004	4.28879
ABCA13	0	0.054275	0.0996389	0	0	0	1.41976	0.556187	1.03208	4.28862
WTAPP1	0	0.3507	0	0.467621	0	0	1.35909	2.7952	2.59342	4.26609
RP11-404P21.9	0.513874	0	0	0	1.64721	1.54058	3.09193	4.99641	1.68573	4.24947
CLEC2B	0.362735	0.225273	0.62034	2.55321	3.13938	3.55239	7.85713	6.92551	8.15098	4.24636
PLEK2	0.875809	1.97787	1.21033	0.659318	0.255216	0.15913	27.3063	23.7871	25.9878	4.24541
SYT7	0.152447	0.23669	0.14484	0.736402	0.570108	0.558594	3.28684	3.234	3.56315	4.23915
AP000695.4	0.172489	0	0	0	0.276454	0	1.03785	1.06726	1.13168	4.22998
RP13-631K18.2	0	0.173654	0.0708436	0	0	0	1.68243	1.21931	1.65107	4.21887
RP4-530I15.6	0.386614	0.300129	1.46928	0	0.309819	0.386352	14.5388	14.3528	11.2558	4.21886
KYNU	0.378461	0.387565	0.321322	0.0500106	0.0903403	0.177032	6.674	6.93251	6.47171	4.20675
STEAP1	1.59681	1.89586	1.69561	0.972281	1.05381	1.22026	34.3338	28.6438	30.89	4.1773
CLDN14	0.100187	0	0	0	0	0	0.150703	0.974118	0.65731	4.15284
PTPRE	0.138807	0.0718372	0.2198	0.143681	0.296627	0.0924751	2.54035	2.49476	2.61823	4.15219
LINC00519	0	0.280766	0.171811	0.374371	0.579662	0.180713	1.6321	3.83622	2.52117	4.14187
SPNS2	0	0	0.0679868	0	0.057344	0	0.484375	0.347879	0.35211	4.12271
PODXL	1.03941	0.962066	1.04451	0.331048	0.384437	0.299626	17.0181	17.8802	17.8517	4.11419
RP13-463N16.6	0	0	0.336228	0	0	0	1.59698	2.03323	2.17669	4.11026
SP140	2.12638	4.95213	2.02026	0.440209	0.681602	0.424987	55.3348	51.687	48.3047	4.09349
RP11-1035H13.3	0	0	0.153371	0	0	0	0.971285	0.713433	0.926708	4.08974
PREX1	1.26438	1.30872	1.17626	1.63597	1.73094	1.36882	20.3663	19.3717	22.8988	4.06229
RAP1GAP	0.0739831	0.0574332	0.0702911	0.153162	0.0592875	0.184832	1.22416	1.04631	1.06179	4.04617
SMOC1	2.81279	3.69527	1.85014	2.68759	2.42746	3.0271	44.2633	43.0313	47.3777	4.01012
SPX	0.0543543	0.253172	0	0.112526	0.174231	0.108635	1.8805	1.58546	1.38186	3.97856
OTUB2	1.25783	1.56232	1.31456	0.781196	0.907181	0.754183	21.7113	20.763	21.972	3.96224
UPP1	4.996	6.64869	6.37412	4.13715	9.37992	6.56172	90.3959	94.5028	92.5978	3.94489
SPP1	0.780075	0.484458	0.667032	0.161493	0	0.233864	8.80055	9.44638	11.2595	3.93319
TRIML2	0.150494	0.817801	0.0714919	0	0.120601	0.0751959	5.31985	4.85535	5.61566	3.92473
NPPC	0.117345	0.18219	0.111489	0	0.188073	0	1.76513	1.65956	2.79083	3.91858
XKRX	0.476344	0.134468	0.164572	0	0	0.129824	3.97347	3.63631	4.01307	3.90591
LAMC2	1.48694	1.99784	1.63008	0.355188	0.4583	0.600085	24.6035	24.4413	26.5933	3.88635
ANGPTL4	47.1424	50.2988	46.0635	238.207	208.407	169.017	722.569	706.212	675.756	3.87433
DIRC3	0.0801364	0.18663	0.114206	0.497702	0.513748	0.40041	1.80814	1.7	2.00447	3.85498
ZMIZ1-AS1	0.389326	0.0671632	0.246598	0.35822	0.207995	0.216145	2.4076	4.62663	3.12193	3.85251
CHST11	15.1611	14.4856	14.1275	16.9007	15.8879	17.1904	205.69	205.397	208.265	3.8226
CHST2	2.58395	3.8029	2.5573	6.01804	5.39242	5.56786	41.3786	42.2537	42.2277	3.81473
RP11-465B22.3	0.757399	0.39198	0.479735	0.522663	0.606954	0.756885	9.11437	6.36	7.35024	3.80843
FZD8	1.56075	1.42543	1.57009	1.33046	0.980966	1.49853	20.7151	20.2877	22.6632	3.8046
ROBO4	0.523694	0.447198	0.447804	0.0542083	0.167868	0.183168	5.98691	7.01291	6.72143	3.79711
C15orf48	0.50545	0.523175	0.320151	0	0	0.336738	5.82904	6.25482	6.63236	3.79457
TFPI2	38.3513	45.9118	48.4715	53.5923	85.9728	82.6516	630.1	570.621	604.502	3.76556
RP11-525A16.4	0	0.392382	0	0	0	0.505107	2.66108	1.56371	1.03631	3.74503
C8orf4	0.598689	0.929525	0.568812	2.47884	3.09184	2.79198	10.0062	9.29018	8.78323	3.74311
LIPG	0.212363	0.824288	0.655738	0	0	0	8.22561	7.27377	7.09703	3.73896
SIK1	0.73286	0.56892	0.845492	2.54671	2.51695	2.85098	8.97656	9.27718	9.78808	3.707
FOXL2NB	0	0	0.36091	0.78641	0	0.253072	2.09514	1.67884	0.934591	3.70558
PAEP	0	0.228499	0	0	0	0	1.32827	1.04069	0.603482	3.70139
HES2	0.100925	0	0.0958881	0.208937	0	0.100856	0.759065	0.802875	0.993226	3.69852
NAMPT	10.9818	9.52814	9.76887	28.8643	41.3275	42.3642	130.25	131.163	129.597	3.69082
RP11-53O19.1	0	0.259461	0	0	0.267838	0	0.502752	1.18171	1.64461	3.68153
PTPN22	0.0687457	0.106735	0.195945	0	0	0.206097	1.75795	1.33683	1.63498	3.67062
RP11-100E13.1	0.306029	0	0	0	0	0	0.460336	2.16402	1.25488	3.66403
ACTBL2	0.044141	0.137067	0.0419382	0.0913819	0.141492	0.044111	1.06237	0.897384	0.832606	3.64542
APOD	0.218283	0	0.82956	4.06706	2.44894	1.19974	4.76102	4.0518	4.29636	3.64508
LINC00460	0.248149	0	0.235765	0	0	0	2.23962	1.75473	2.03508	3.6392
LUCAT1	0.284826	0.442222	0.541225	0	0.4565	0.569266	5.14131	4.5317	6.07328	3.63407
CDKN2B	4.03636	3.28031	4.0147	8.22563	8.33922	9.45381	48.4304	45.1827	46.5245	3.62845
PNP	16.3849	23.0329	17.671	5.95902	4.61336	4.64662	232.144	239.75	231.522	3.6231
GAL	8.40018	6.81748	7.61821	5.13804	7.95554	7.63134	92.7578	94.3314	90.9665	3.606
ZC3H12A	1.9299	1.71221	2.05188	4.47097	5.67071	7.66844	21.9799	23.7196	22.0451	3.57259
ATP2A3	0.474853	0.450546	0.350899	1.36535	1.01475	0.975424	5.31745	5.03673	4.80296	3.56996
RP11-148B18.3	0.256937	0.398921	0	0.531919	0	0	2.31894	2.2711	3.16073	3.56288
LINC00973	5.64087	4.17996	5.60298	0	0.410945	0.896801	57.4674	61.872	60.2445	3.54143
ACP5	0.0756625	0	0.359433	0	0.3638	0.151222	2.16245	1.73885	1.11692	3.52777
CAMK1G	0.377733	0.146617	0.269162	0.195498	0.302702	0.235923	3.19609	3.04668	2.82675	3.5147
MLKL	1.73119	1.93525	1.579	0.573433	0.998867	0.968807	20.5202	19.5868	19.4791	3.50584
HCLS1	0.184995	0.574447	0.117175	0	0	0.123246	2.59722	3.37939	3.9446	3.5005
HRAS	55.5082	68.2781	65.737	34.7981	34.7714	33.2042	689.73	693.984	747.596	3.49129
GPNMB	1.08866	1.93172	1.1821	4.18559	6.23155	5.59503	13.1007	17.0461	16.1983	3.4631
GCH1	0.910184	0.706576	0.679456	1.88429	1.77138	0.844597	7.82353	8.50494	8.4775	3.43336
RP11-815M8.1	0	0.265947	0	0	0	0	0.515321	0.908439	1.40477	3.41084
ENC1	14.6789	15.3671	13.7554	7.12309	7.84213	7.3903	157.789	158.088	149.535	3.40946
ELMOD1	0.807838	0.836167	0.383762	0.836204	0.755269	0.807289	6.58215	6.24799	8.66787	3.40624
TSGA10	0.0954073	0.197506	0.181292	0.263353	0.254854	0.222466	1.62649	1.57419	1.74745	3.3833
NEFM	0.368149	0.285794	0.378925	0.444589	0.442533	0.183949	3.32267	3.63375	3.72369	3.3702
PRSS3	3.19177	4.75732	4.60938	2.64307	1.43235	2.93443	44.1704	40.4001	44.7084	3.36375
NRG1	21.0501	25.039	22.4996	29.6967	40.4036	42.3261	235.437	236.782	231.175	3.35829
RP1-232L22__B.1	0.864095	0.975705	0.970241	1.78887	1.25901	1.02051	10.6346	8.54048	9.53455	3.35287
CCDC88C	0.0681946	0.105879	0.129583	0.0705892	0.0546488	0.102222	0.923218	1.085	1.09057	3.35119
RASD1	0.988899	1.53537	0.872439	0.877392	0.45284	0.423526	12.3252	9.67752	12.5126	3.34503
NAMPTP1	2.30569	2.43732	2.09741	3.35147	5.26791	6.17701	23.7613	23.8492	21.846	3.34395
L1CAM	2.26736	3.10836	2.72714	1.09858	1.50771	1.51858	26.4141	27.525	28.1691	3.34102
MAP3K9	0.143548	0.102864	0.136385	0.571495	0.407045	0.441386	1.1793	1.16147	1.48514	3.32115
SLCO2B1	0	0.329007	0	0.438696	0	0	1.27502	1.12384	0.86893	3.31213
SLC20A1	72.4805	71.8695	69.6259	39.042	43.7891	45.0189	712.542	695.25	710.188	3.30717
CYP2S1	2.17224	2.20253	1.72688	3.39571	4.61833	4.96174	20.272	18.0643	21.7411	3.29955
PPARGC1B	0.287387	0.25497	0.156026	0.509962	0.263202	0.205137	2.34673	2.32251	2.15486	3.28855
AMPD3	37.8663	38.7563	33.5648	59.1224	53.9085	61.7288	366.894	367.24	341.945	3.28775
CD163L1	2.57252	1.87958	2.01283	0.939832	0.242533	1.05856	22.535	21.4013	18.4913	3.27148
ICOSLG	0.488919	0.569323	0.812911	3.79565	1.56721	1.46576	6.98671	5.61809	5.11231	3.24314
RNU6ATAC	0	0	0.929963	2.02636	0	0	2.94469	1.73036	4.01363	3.22389
HTR7	0.986323	0.796311	1.08704	0.898442	1.07495	1.06451	8.42713	8.75309	9.54489	3.21924
DUSP6	10.6512	12.2287	11.2115	17.9885	20.3056	23.2487	107.388	102.596	107.235	3.21799
SNCA	0.527224	0.440768	0.577977	2.60275	2.47	2.35063	4.63636	4.62434	5.12203	3.21775
TMEM158	26.4618	38.7611	38.2613	80.9761	94.1987	99.4534	327.236	304.37	330.097	3.21618
TMEM132B	2.65226	3.77474	4.19983	0.457565	2.8339	1.32523	27.5946	34.3839	35.5271	3.19777
NLRP2	0.207976	0	0.197597	0	0.66666	0	0.312842	1.83832	1.53506	3.18411
CTD-2207P18.2	0.369805	0	0	0	0.296349	0	1.11254	1.47094	0.758197	3.17573
CTD-3088G3.8	0.224236	0.348149	0	0	0	0.448168	2.02381	2.57666	0.551692	3.17012
TNFAIP3	23.1427	24.5607	21.4311	81.2661	95.7805	99.2409	195.21	209.998	214.299	3.16365
SAT1	30.64	31.077	30.5738	90.8446	94.5138	92.4731	275.841	286.481	264.665	3.16361
PARD6G-AS1	0.422363	0.983641	0.802571	1.31158	2.36927	0.633114	6.67093	6.53329	6.40806	3.15057
E2F7	4.57653	4.6703	4.06235	1.02306	1.17084	1.0521	38.3636	40.5094	39.2416	3.14969
CFAP54	0.511035	1.05791	0.647377	1.05796	1.63811	0.510688	5.63721	6.47451	7.54385	3.1487
RP11-230G5.2	0.714956	0.27751	0.509458	0.37003	0	0	4.03295	4.58169	4.69071	3.14712
ADTRP	1.07712	1.11489	0.341122	0	0.575443	0.538193	7.83108	6.50585	8.09737	3.14671
RP3-332B22.1	0.197013	0	0.187181	0	0	0	0.889052	1.04485	1.45414	3.14055
RP11-54A9.1	6.13242	7.40539	6.04219	0.940409	2.18414	2.04275	53.6389	59.4249	59.2332	3.13745
VGF	2.77792	3.49501	2.7303	2.28054	1.38173	2.48885	24.8555	25.909	28.3202	3.13488
ALOX5AP	0.136427	0.423633	0	0	0.218656	0	1.84695	1.68825	1.34261	3.12258
CLDN5	0.0484026	0.07515	0.0919743	0	0	0	0.582466	0.727321	0.555734	3.11364
LINC00704	1.08477	0.388665	0.317119	0.172748	0.133738	0	5.14624	4.72044	5.40618	3.09249
CTD-2263F21.1	0.538558	0.418083	0.767524	0	0.431582	0.269096	5.26572	4.76038	4.63758	3.08828
ITPKA	1.15803	0.224744	1.65036	3.2964	2.32001	2.02517	8.70965	9.85208	7.12278	3.08202
IL1RAPL1	0.840809	1.40988	0.95862	0.974773	0.970266	0.73941	9.86516	8.44276	8.79869	3.07831
LPXN	5.17057	6.93313	6.1965	1.82459	2.44844	2.34866	51.3504	51.1565	51.656	3.07452
CTD-2066L21.3	0.276524	1.288	0.262725	0	0	0	3.32763	6.355	5.66948	3.07069
GK	4.13586	3.47384	3.704	4.42145	5.43333	4.84447	32.687	31.2235	30.9158	3.06722
CNIH3	9.99591	8.74348	8.82828	10.4926	12.6361	10.8333	77.0864	77.9017	75.8576	3.06588
ARHGAP26	0.269593	0.195333	0.426899	0.520911	0.547308	0.556781	2.67648	2.54183	2.16673	3.04977
HSD11B1	0.362202	1.12471	0.688254	2.62445	1.45128	1.26685	4.90349	6.56317	6.53497	3.04893
COLEC10	9.75594	8.28803	12.2422	25.9132	28.6171	40.101	80.8515	81.19	84.085	3.02267
CD22	0.445234	1.03691	0	0	0	0	3.68352	4.5258	3.83396	3.02247
IER3	41.6581	42.6934	41.1415	68.0856	80.0908	82.0728	338.05	333.659	340.966	3.01249
FLRT3	2.68557	2.64611	2.55156	4.81133	5.50448	5.65136	21.2861	21.8664	20.4151	3.01143
AC008063.2	0.385406	0	0.183086	0.398939	0.926553	0.770288	1.44934	1.19233	1.89644	2.99688
IL20RB	0.288829	0.896872	1.09766	4.18559	0.92583	2.02043	5.21355	7.65897	5.21114	2.98546
S1PR5	0.42146	0	0	0	0.084436	0	0.950955	1.02447	1.33936	2.97545
CLDN1	12.5066	15.0171	15.4169	14.2293	21.1236	21.2786	116.287	109.702	111.429	2.97412
F2RL1	24.1783	22.7129	28.1838	28.6027	29.3078	24.7711	211.799	183.544	191.623	2.96687
SLC22A23	0.76141	0.749667	0.776346	0.461354	0.476229	0.519634	5.72665	5.7617	6.35098	2.96327
TRIB1	5.32676	5.84719	5.86682	12.011	14.5734	13.7995	43.4826	44.2348	43.1008	2.9405
ARRDC4	4.45223	5.73694	4.92067	18.3089	21.8441	20.6419	40.274	37.6672	37.904	2.93864
PLAU	651.962	689.827	680.268	1591.39	2168.4	2322.98	5188.49	5139.9	5114.45	2.93304
MREG	1.31402	1.1658	1.96184	0.971541	0.752149	0.750357	11.8594	11.1999	10.3915	2.91287
CYTH4	0.189156	1.17474	0	0.391597	0	0.378056	4.26799	3.34395	2.63718	2.9097
SPSB1	5.53403	4.78705	6.53478	7.69236	6.84224	7.82139	41.2653	42.3472	38.8041	2.86048
FAM60CP	0.185738	0	0.705875	0.38452	1.48844	0.928058	2.51452	1.64176	2.28487	2.85283
HK2	5.85454	6.10408	5.33907	4.86579	5.6505	5.53028	41.9435	41.9846	39.3745	2.83355
PRKG2	0.682969	0.558094	0.683039	1.11624	1.95879	1.76015	4.10935	4.98834	4.45138	2.81594
BPGM	17.7291	18.3508	18.9833	25.6341	21.1985	21.1621	129.956	128.29	125.434	2.80074
SAXO2	0.362735	1.12637	1.37853	0.750944	2.90683	3.2624	5.45634	7.37438	7.13954	2.79992
PDE4B	2.56037	1.67631	2.13952	3.89559	4.69688	4.93231	14.8487	14.9967	14.5467	2.79953
NRCAM	0.391523	0.202627	0.49598	1.26084	1.25501	0.912934	2.094	2.92238	2.56872	2.79867
RAB27B	5.70972	5.31895	7.5947	11.2294	21.9627	21.1116	49.8143	40.8797	38.8653	2.79843
CYP3A5	0.21511	0.222654	0.13625	0.148442	0.114921	0.0716547	1.18644	1.838	0.94087	2.78828
MAST1	0.16488	0.255992	0.156651	0.170669	0.396386	0.0823838	1.11607	1.38452	1.4874	2.78771
C2CD2	10.5773	10.2482	9.97237	9.63264	12.747	11.4082	73.7342	68.1957	70.6829	2.78732
RRAD	1.57208	1.46449	2.46449	3.74276	1.88972	2.04232	12.6515	13.0621	12.2481	2.78676
SLC39A8	0.152939	0.142472	0.087184	0.443266	0.637312	0.458505	0.920216	0.757032	0.953237	2.78144
NFKBIZ	20.8315	18.1751	15.0629	50.1864	69.4338	70.0053	112.446	129.626	124.804	2.76241
CXADR	0.453564	0.398028	0.374721	0.449078	0.663729	0.315308	3.26298	2.8238	2.23182	2.76201
LIF	14.5112	13.7497	14.5251	44.5799	52.342	51.8882	88.0135	102.915	94.3394	2.73711
FERMT1	1.81913	1.72922	1.93999	1.38344	1.48754	1.8921	11.1131	12.5355	12.7267	2.72851
CHD7	1.96108	3.72139	2.89833	3.60878	4.19077	5.00823	18.6827	18.875	19.2995	2.72816
RP11-589N15.2	0.518193	0	1.477	0	0	0.517841	3.11791	4.12233	5.94962	2.72483
SLCO4A1	0.239321	0.37157	0.492652	0.247724	0.57535	0.398597	2.33994	2.71474	2.22437	2.72161
CTD-2587H24.5	0.375319	0.116544	0.356589	0	0	0	1.58078	1.85779	2.15461	2.72076
ANOS1	0.234393	0.121306	0.148464	0.0404373	0	0.0195195	1.14588	1.10497	1.05725	2.71404
PRDM1	5.19383	4.47183	4.93464	4.78971	3.85946	4.76564	31.6768	31.5102	32.6045	2.7139
APLN	0.153922	0.0597448	0.10968	0	0.123348	0.0769087	0.810364	0.578226	0.725835	2.70911
KBTBD8	8.6852	8.76503	8.04549	10.7882	9.04803	8.6793	55.1974	57.5771	52.5305	2.6968
MT1X	10.6886	11.9144	9.63441	12.4824	5.27106	5.20373	74.6185	63.4696	70.1262	2.69126
IFNE	0.585294	0.259637	0.238323	0	0	0	2.64124	2.80846	1.50858	2.68336
MED12L	0.998622	0.775232	1.89758	1.03369	3.60118	3.24332	9.76397	6.84087	6.96129	2.6823
XDH	0.477014	0.370307	0.432609	0.0897753	0.208507	0.173342	2.70707	2.75981	2.72063	2.67736
RP11-1149O23.2	0.19361	0.9018	0.551846	0	0	0.193479	2.6211	4.9629	2.85806	2.66427
PCDH1	0.128656	0.119851	0.195577	0.106539	0.0824806	0.0257138	0.851521	0.932509	1.01291	2.65494
MT2P1	0	0	0.640302	0	0	0	0	1.78709	2.21079	2.64241
HEY1	1.23706	0.417536	1.12423	0.334044	0.172407	0.322493	6.47241	6.22793	4.63152	2.64088
IRAK2	2.26618	2.25403	2.08581	1.61271	2.27005	2.58311	14.168	13.6461	13.2709	2.63676
TNFRSF10A	1.81768	2.53993	1.98602	1.88151	1.52946	1.77104	13.3976	13.4157	12.6336	2.63653
RP11-1E6.1	1.32207	0.879704	0.897207	0.390997	0	0	3.12507	10.3504	5.73095	2.63172
ZNF438	4.46117	5.36239	5.74255	7.74603	6.68877	7.62199	32.9036	32.5639	30.9214	2.63046
MAPK13	17.5479	16.8842	18.316	10.2333	8.71467	9.38548	99.2638	117.97	106.414	2.61723
B4GALT6	0.362161	0.475786	0.47643	0.576736	0.669747	0.389755	2.93338	2.29008	2.83302	2.61577
C15orf65	0.338354	0.525328	0.482203	2.45164	0.813435	1.69062	4.07167	1.94398	2.21988	2.61331
RP5-907D15.4	0.255077	0.59405	0	0	0	0.127452	2.494	0.78913	1.88271	2.60495
EFCAB5	0.217897	0.338308	0.62107	0	0.698462	0.870997	2.29436	2.50382	2.32308	2.59668
TNFAIP2	10.9962	7.69946	13.3154	21.8719	19.6974	26.0713	57.0817	67.2753	67.0164	2.57975
JAG2	0.295907	0.164081	0.200815	0.437568	0.271006	0.211219	1.23995	1.45724	1.24804	2.57782
SQRDL	5.43698	6.62494	5.81953	20.0894	18.9723	19.5323	36.9582	37.1689	32.5669	2.57694
OSTN-AS1	3.59213	1.48724	1.8202	0.991538	0.76763	0.239313	10.8067	16.5107	13.5513	2.56642
MICALCL	2.81458	3.57539	2.18792	0.529712	0	0.255697	16.935	14.7009	19.0956	2.56418
P2RX5	0.901314	1.86584	1.56995	0.621976	0.842663	1.12588	9.03851	8.36516	8.00771	2.55067
ACSL5	0.736078	0.62856	0.349673	1.75243	2.00555	1.9125	3.21095	3.54592	3.22959	2.54235
ECSCR	0.238319	0.370014	0.113213	0	0.19098	0	1.97166	0.947936	1.2704	2.53779
PLXNA2	0.560394	0.451767	0.542668	0.156173	0.172723	0.236929	3.25836	2.53385	3.20824	2.53324
FOSB	0.312667	0.323632	0.23105	0.215764	0.556802	0.347172	1.51548	1.81176	1.68098	2.52961
TMEM132A	228.389	254.128	261.113	301.815	342.253	334.362	1493.29	1390.25	1397.59	2.52533
DUSP5	17.1707	19.3205	17.0012	21.8675	21.7995	23.9552	99.6865	102.405	105.851	2.52525
DDIT4L	1.51557	1.47068	2.24991	1.56879	1.29044	1.18324	9.47525	9.87979	10.7203	2.522
GFPT2	9.37036	6.87181	7.61469	7.42932	9.07481	7.84982	46.3039	44.1619	46.2716	2.51893
NTSR1	1.85054	2.17804	2.35371	0.494329	1.05243	0.715854	12.2121	11.9777	12.3859	2.51873
RAC2	12.7324	12.0161	14.469	6.37441	6.00196	5.40553	76.3593	74.9554	72.9571	2.51568
IQGAP2	0.379866	0.425953	0.240606	0.655341	0.541176	0.801395	2.0634	1.67884	2.23263	2.51344
GDNF	1.42428	1.20619	1.44547	2.41248	1.71206	1.26157	7.6446	7.66808	7.91096	2.51039
ANPEP	23.0363	23.1153	26.9204	25.6154	22.0881	24.093	140.776	138.563	136.233	2.50771
UNC13A	0.325938	0.311416	0.214389	0.0519051	0.10046	0.0876929	1.60285	1.57347	1.62438	2.49475
BEST3	0.415602	0.80658	0.296146	0	0	0.20766	3.12579	2.847	2.55628	2.4899
TCP11	0.291905	0.226606	0.0693345	0.151078	0	0.21878	1.09772	1.35459	0.837875	2.48466
BTBD11	0.727105	0.996093	0.711138	0.664091	0.754053	0.705241	4.34274	4.27204	4.94581	2.47782
CSGALNACT2	11.804	9.65111	10.8065	14.9222	16.6929	16.3557	62.369	57.8381	59.1676	2.47509
C10orf55	0.932458	0.990556	0.932553	1.9304	2.51702	2.40313	4.72463	5.59595	5.39325	2.46019
NEK10	0.816185	1.06712	0.897895	0.444655	0.619638	0.472207	5.62168	4.82222	4.79119	2.45362
SH3TC1	2.27127	2.46846	3.66847	3.29143	2.18414	1.81578	14.6909	12.6479	18.6268	2.45068
CHRNA1	1.05676	0.868619	1.24026	1.67297	1.79333	1.05604	6.73242	5.16491	5.2509	2.43749
STXBP5-AS1	1.15717	1.51295	1.56234	0.126084	0.195224	0.608623	8.15352	8.18268	6.54311	2.43448
WLS	139.314	145.703	151.114	318.493	346.52	364.898	778.309	768.761	786.357	2.41962
LAMB3	0.304143	0.472213	0.49124	0.188893	0.0974918	0.0911809	2.01299	2.55393	2.17003	2.41
FAM83H	0.501696	0.575733	0.455935	0.406418	0.314641	0.762931	2.62491	2.79569	2.70122	2.4051
GCNT2	1.08098	0.610302	1.9607	0.610329	2.52003	1.86588	7.53888	5.38548	6.28621	2.39515
TRIM36	0.0913555	0.236398	0.115729	0	0.24403	0.0912934	0.87032	0.699834	0.749211	2.38678
IL12A	1.70166	2.51619	2.30963	1.67754	1.68833	2.59125	11.0919	11.6032	11.4301	2.38624
F11R	0.357108	0.198017	0.145409	0.15842	0.20441	0.101962	0.882494	1.37534	1.40157	2.38508
SLC22A4	2.35341	2.00095	2.87481	1.50803	1.97575	2.23982	13.0645	12.4317	11.81	2.36751
NETO1	0.31395	0.568679	0.298282	0.649947	0.838628	0.366026	2.20383	2.12753	1.75939	2.36672
ANK3	0.175413	0.192912	0.229156	0.121048	0.163998	0.124166	0.978481	1.06596	1.03697	2.36663
INHBA	75.9016	72.2479	70.8578	18.147	19.949	18.6576	380.913	365.724	382.374	2.36601
DPP4	15.3215	15.8424	15.2472	40.6133	44.7075	46.975	80.4978	79.5256	77.3085	2.35437
CLGN	3.80973	4.15308	4.31273	3.69179	2.59829	3.88815	20.3622	22.5333	19.8431	2.35357
UBE2FP1	0.275906	0.428372	0.262137	0	0	0	0.415024	2.68264	1.81017	2.34437
NPC1	42.9576	39.8025	44.237	24.6715	28.6503	26.034	207.402	213.248	220.016	2.33478
HIST3H2A	1.65358	2.78131	1.57107	2.2822	2.4294	1.51476	9.94943	9.74415	10.3969	2.32484
TRIB3	12.6564	12.2269	14.029	19.7968	20.2849	20.7987	63.6718	64.6369	66.5448	2.32409
OGFRL1	12.4638	12.3912	11.6742	6.14645	8.88089	8.90086	64.6905	57.5399	60.269	2.32077
TPK1	0.306682	0.136044	0.208127	0.0907002	0.351092	0.350255	1.25215	1.16177	0.826395	2.31573
PRLR	0.954907	1.2545	1.46556	1.21654	0.588638	0.587236	6.51901	5.90837	5.84331	2.31373
MT1L	13.2032	16.7722	15.1102	3.72731	8.17591	8.6962	69.9633	72.4098	78.5031	2.2925
RPS6KL1	0.158231	0.315861	0.128858	0.374371	0.217373	0.24848	0.918057	0.939075	1.09374	2.29103
DKK2	0.644109	0.421071	0.322087	0.210545	0.543333	0.508162	2.54969	2.18744	1.97394	2.2743
CTC-246B18.10	0	1.10683	0	1.47584	0	0.712405	1.07234	2.52052	1.75393	2.27224
ERRFI1	230.181	235.055	224.81	229.736	299.592	306.957	1068.55	1138.15	1123.35	2.27078
MARS2	1.7566	2.15647	3.02738	1.776	1.44042	2.082	12.0441	10.6521	10.6872	2.26603
ADAMTS4	0.252389	0.254709	0.227804	0.0783754	0.0809024	0.13872	1.21488	1.17122	1.13842	2.2618
BNC1	0.856086	1.28762	0.991288	1.49537	1.58646	1.39019	4.62783	4.82399	5.52889	2.25657
NRIP3	9.13075	9.85311	9.9056	4.42404	3.63259	3.88279	46.7076	45.6771	45.646	2.25637
GSAP	1.79012	1.90166	1.56651	2.24308	2.34057	2.30675	8.36166	8.57777	8.15175	2.25451
BTN2A2	7.64783	9.1997	6.15334	6.70396	6.0735	8.12461	35.8594	39.5856	33.6768	2.24618
INSC	0.876753	0.842677	1.11067	0.950755	1.27137	1.08477	4.96132	3.80105	4.65657	2.24535
ARHGAP27	0.300479	0.311016	0.285484	0	0	0.0667277	1.55684	1.29847	1.36902	2.23558
IL11	11.895	10.9131	12.2261	3.91768	5.80602	5.40316	53.841	53.67	56.9791	2.23117
AOC2	0.278502	0.360335	0.308704	0.192187	0.37197	0.417469	1.60589	1.39497	1.44654	2.2307
ESAM	0.220232	0	0.418483	0.45593	0.705945	0	0	1.16799	1.80613	2.21922
TMCC1-AS1	1.3309	0.688785	0.210747	0.45921	0.355512	0.664997	4.67125	2.94099	2.72869	2.21297
TIMM8AP1	0	1.29818	0.397204	0	0	1.67113	3.14433	2.95627	1.7143	2.20461
ERN1	1.28403	1.38579	1.20508	1.78297	2.20854	1.75261	6.2184	5.46724	6.16415	2.20368
WNT9A	0.341634	0.482201	0.560647	0.90015	0.597325	0.80695	2.14901	2.22363	1.96123	2.19374
DOCK9	1.64597	2.19045	2.53191	1.37924	1.57026	1.0574	10.3752	9.76853	8.93483	2.19097
NTNG1	4.41042	4.96296	5.07452	2.2617	2.72373	1.6174	22.8243	20.3862	22.5316	2.18596
AC159540.1	1.02207	1.05791	1.29475	2.82123	1.63811	1.87252	3.84355	7.5285	3.91163	2.17914
SPRY2	14.346	15.9097	15.7936	9.05126	10.8759	11.2869	69.123	69.3607	68.9479	2.17139
DGKG	4.18067	5.19274	3.57484	1.73099	2.6802	0.417783	20.7526	17.7376	19.543	2.16412
ADGRE5	54.6265	69.4816	69.866	30.8821	38.7248	37.7927	290.125	280.796	294.126	2.15691
SPRY4	10.9393	11.9822	11.4375	12.3576	11.8487	12.2298	50.6805	50.4664	51.9236	2.15543
SPHK1	40.1221	41.4111	35.5208	6.13526	4.7498	5.46748	177.286	162.411	180.039	2.1506
C9orf72	1.34892	0.957411	1.09852	1.03724	1.05009	1.11692	5.10168	4.53084	5.43646	2.14592
BHLHE41	1.12498	1.69674	1.0383	0.665418	0.618185	1.02785	4.93161	6.19358	5.95737	2.14584
PPP4R4	1.31202	0.339507	0.623273	0.452697	0.700939	0.218522	3.28928	3.67241	3.04865	2.13768
VEGFA	25.6479	21.3896	22.6274	41.4157	35.5867	43.5719	95.2379	109.596	96.3958	2.11236
SVIP	42.6666	38.5601	37.7139	21.0936	19.3922	23.1219	173.382	165.301	175.304	2.11149
BRSK2	0.150807	0.187314	0.401187	0.624409	0.483406	0.6631	1.27034	0.959759	0.964685	2.11147
IL31RA	0.45753	0.236788	0.434698	0.526218	0.32591	0.508022	1.68233	1.43792	1.75104	2.10924
RP3-412A9.16	0.612276	0.271606	0.581721	0	0.280375	0.262226	2.49985	1.93285	1.86506	2.10334
GGT1	1.06045	0.823225	0.705268	0.987915	0.509883	0.794794	3.58908	3.09322	4.39187	2.09677
LINC01483	0	0.6513	0	0	0	0	0.631005	1.11237	1.03208	2.09133
ECE2	1.48835	1.15541	1.28552	0.560222	0.975854	0.608456	5.9023	4.90348	5.93656	2.09117
STRIP2	0.651008	0.711273	0.50398	0.199665	0.231865	0.265045	2.50256	2.74929	2.62993	2.07837
PITPNC1	1.99498	2.26111	2.46406	3.18016	3.13347	3.32936	9.39281	9.45176	9.52208	2.07763
CDK17	12.5496	10.3641	11.5287	13.2666	13.2664	14.231	49.8933	47.3341	47.1533	2.06762
TMC5	0.903516	0.7014	0	0	0.724046	1.35435	2.03863	3.19451	1.48196	2.06491
SMOX	50.2129	49.9221	42.2668	88.4505	67.7707	82.751	182.865	196.223	215.652	2.06229
ADAM19	91.8349	94.0212	89.5634	30.8472	31.4704	30.1278	388.086	365.091	396.986	2.06213
DARS-AS1	0.319507	0	0.303563	0.661453	0.512085	0.31929	0	1.55329	1.04812	2.06183
MSX1	1.97175	1.6788	1.32948	1.18509	1.73301	1.6526	8.80218	5.73455	6.20736	2.05847
PTPRU	4.74558	5.01195	4.48254	7.19697	7.20791	6.9481	19.0911	19.2662	20.817	2.05501
NR4A3	1.85853	1.47977	1.62995	1.7758	1.90943	1.76202	7.45503	6.14986	6.95655	2.04913
ADGRG1	7.66704	8.84287	7.49256	5.44201	7.02184	6.34838	33.6103	30.7869	34.8523	2.04788
RAB3A	5.24636	5.76452	4.67781	5.17994	5.30383	4.92017	21.8539	20.6182	22.1748	2.04286
HIST1H4H	15.8434	14.952	12.3964	25.725	29.8738	27.6295	69.6267	59.0371	48.9158	2.03964
RP11-157G21.2	0.509207	0.632476	1.06435	1.05417	1.14257	0.610633	2.91065	2.79058	3.34083	2.0352
OSBP2	1.2122	0.836471	1.06639	1.11534	1.1513	1.5703	4.32217	4.16685	4.27108	2.03431
KRT15	0.565193	0.182817	0.44749	0	0.0377439	0	1.20442	1.91506	1.77682	2.03408
HES7	0.368369	0.57193	0.559978	0.305043	0.472317	0.515366	1.21904	2.34436	2.53765	2.02383
ULBP1	2.59063	3.35185	2.79699	3.73799	3.27134	3.60873	11.3364	11.3107	12.8763	2.02315
CCL26	0.234467	1.0921	0.222767	0	0	0	2.11615	1.86524	2.30746	2.02114
HIVEP3	0.768725	0.738101	0.509332	0.607259	0.599819	0.545829	2.82997	2.30667	3.02775	2.01774
CTSL	32.0646	29.9053	32.1331	44.0977	41.5849	40.7612	122.2	125.637	131.482	2.0111
AC098614.2	2.48315	3.85535	5.03303	1.37085	3.44918	1.98517	14.9408	16.6811	14.1194	2.00807
TM4SF19-AS1	0	0	1.0917	0	0	0.382752	1.15227	1.35419	1.88466	2.00802
RPP25	0.161797	0.439611	0.614892	0.669914	0.453805	0.768015	2.00788	1.4659	1.39325	2.00054
CEBPB	25.473	34.3611	34.9849	55.8678	56.389	61.8751	121.97	123.447	132.376	1.99435
C16orf74	5.85777	4.42449	5.26462	8.52163	8.88095	8.38517	18.3372	23.3698	20.1248	1.99173
TNFRSF10D	105.099	112.952	102.537	42.5776	50.785	41.6278	438.2	402.959	422.613	1.97895
TATDN2P2	0.77566	0.860207	0.631673	0.344098	0.443991	0.387566	3.66697	2.59554	2.58993	1.96495
RP11-680A11.5	1.71556	2.07168	3.07879	1.57849	2.44408	1.33342	8.88869	9.94087	7.97267	1.9648
OSGIN2	4.16081	5.04978	4.2594	3.7003	3.6161	4.1287	17.41	17.586	17.5661	1.96428
ZNF792	0.824737	0.738743	0.632891	0.65669	0.660916	0.792478	2.86289	2.8599	2.83556	1.96221
PLCXD1	5.76177	6.04833	5.42991	2.26973	1.30854	1.8882	22.2113	22.2479	22.6315	1.96035
BHLHE40	61.9764	48.8376	54.1492	45.1325	41.4297	45.7505	215.966	219.677	205.097	1.95759
SLC2A6	4.66306	5.99162	4.5322	2.44114	2.83483	2.83879	21.0428	19.519	18.4177	1.95739
ZFPM2-AS1	1.81367	2.81591	2.50642	2.73071	2.90683	2.47151	9.92062	9.32728	8.38355	1.95312
SEMA3C	14.8501	15.4696	15.1735	12.09	10.6588	10.6477	60.9541	56.234	58.0979	1.94599
IL4R	55.7199	51.0378	52.4963	107.631	109.108	110.665	200.245	205.455	205.729	1.94085
THEMIS2	1.42016	1.74075	2.20148	2.16636	2.63553	1.94206	7.30819	6.54076	6.559	1.92818
AC005592.2	0.83472	0.323997	1.1896	0	1.00337	0.417077	2.51121	3.50464	2.90937	1.92626
CFAP45	1.2866	1.42684	1.2224	1.14152	0.883747	0.367351	3.59419	4.87389	6.48163	1.92537
SLC25A19	3.85406	2.99191	4.18483	1.70974	4.85337	3.57634	16.5639	12.8966	12.4172	1.92464
MCL1	61.9159	61.1165	64.3093	84.3494	89.0295	90.3345	237.698	239.124	232.666	1.9211
FGF2	26.1223	26.2281	24.6457	10.9289	14.0043	14.1165	106.216	93.7267	91.0217	1.91799
ATP2B1	11.6312	11.0054	12.3104	13.3205	13.4288	13.6194	44.2982	43.5457	44.07	1.91636
TRPS1	2.30858	2.16591	2.01743	2.1724	2.94815	2.7388	8.63511	7.69308	8.08946	1.91121
BCAN	0	0	0.585876	0	0.658882	0.20541	0.618385	0.908439	0.67429	1.90957
EPHX4	2.66056	3.73104	2.9355	3.19818	3.16374	3.68795	10.5861	12.4412	11.9655	1.90756
ADAM12	1.36722	1.39909	1.50565	1.54389	1.54387	1.63024	5.37523	5.38334	5.22409	1.90354
FJX1	14.5982	16.5691	14.9697	17.0909	18.1529	19.166	57.2448	54.9958	59.2825	1.8944
AIM1	1.35664	1.33336	1.28894	0.412265	0.618388	0.50995	5.18597	4.7636	4.7974	1.88996
CYSTM1	5.72339	10.0327	8.06896	7.07102	6.36196	7.28776	29.5769	28.9667	29.6011	1.88739
PELI1	1.0853	1.42973	1.24987	1.83831	1.73945	1.77474	4.84814	4.33144	4.747	1.88715
NRK	4.25275	3.9902	4.36028	1.74183	1.86337	1.8039	16.3839	14.5494	15.6696	1.88663
PSG2	0.400942	0.622504	0.533308	0	0	0	1.92994	1.91375	1.90713	1.88523
SLC25A37	5.49781	5.20095	4.20305	4.97619	5.49182	5.92849	16.9245	19.5287	18.119	1.87268
PLK3	12.2241	10.1427	11.1439	8.40141	8.32857	10.4354	39.0089	42.4764	40.709	1.86648
ARHGDIB	3.04397	1.9819	4.29145	0.609843	1.25901	1.07938	11.2255	10.6756	11.9182	1.85986
RP11-879F14.2	5.70506	8.33664	6.05804	1.04213	1.07573	0.670727	26.7546	19.5778	26.5588	1.85857
RNF149	42.1029	40.0848	45.2851	37.8253	40.4242	45.8452	160.123	149.212	151.471	1.85397
KCNG1	8.75748	9.9595	9.48638	3.23337	2.86082	3.45602	36.4151	31.1606	34.0347	1.84911
CCND2	12.5614	12.8837	11.6633	28.2508	30.1073	29.4231	46.4075	43.4873	43.6259	1.84725
CD274	1.75992	1.47132	1.60778	0.490463	0.650926	0.676433	5.49826	5.77372	6.13412	1.8468
AK4	2.36604	1.83676	2.95046	0.918421	1.65906	2.21666	8.89763	7.71192	9.09564	1.84539
DNAJC6	0.451758	0	1.28764	0.467621	1.08607	0.677177	1.01932	2.99485	2.22293	1.84229
HPCAL1	51.7733	59.7973	57.7878	77.1191	70.4982	86.6509	214.641	191.237	200.561	1.84028
AKR1B1	79.6524	76.3754	85.6569	81.9057	81.086	96.6551	286.897	286.265	290.509	1.83736
DLL3	0.269083	0	0.426092	0.185688	0.143756	0.358534	0.944443	0.872101	0.66203	1.83406
RP11-1024P17.1	0.38621	0.0999385	0.122312	0.799544	0.412661	0.192974	0.580946	0.796543	0.791833	1.83401
NKX3-1	1.50816	1.87326	1.79112	1.2489	1.63159	1.69553	5.89838	5.56561	6.92637	1.83
C3orf52	6.16649	6.20544	4.77381	1.18204	1.09814	1.3694	19.9257	19.9856	20.9779	1.82834
C12orf60	0.292945	0.795947	0.347908	0.758079	0.469512	0.21956	2.09311	1.55362	1.44148	1.8243
GMFG	1.48889	0	0	0	0.397716	0.24798	1.49308	1.53539	2.23859	1.82276
PROSER2	7.28459	8.94285	7.8868	11.5736	9.77463	11.8506	27.2667	27.7024	30.2875	1.82193
MTHFD2L	2.26356	1.91695	1.49891	1.13602	1.5391	1.50802	7.63523	6.54803	5.85035	1.81861
RP11-295P9.8	0.561157	0.48403	0.533154	0.258161	0.499658	0.249234	2.15716	1.81871	1.58516	1.81694
FBXL16	1.94911	2.11833	1.71295	0.605265	1.56195	1.60692	4.98422	7.66663	7.67268	1.81391
KIAA1217	1.59122	1.75127	1.47354	1.41776	2.58259	1.4895	5.96873	5.55478	5.38507	1.81184
RP11-82L18.2	2.96161	1.31377	2.81382	1.75177	1.69524	1.9026	7.95521	7.66641	9.19486	1.80761
CASP4	54.092	51.2299	58.9303	85.107	100.566	110.273	183.617	193.641	195.781	1.80272
DCC	0.8338	0.731707	0.929963	0.175117	0.116205	0.0603793	3.09011	2.64894	2.93342	1.79713
FLT1	1.84334	1.75498	2.34615	0.900032	0.808273	1.04269	7.24588	6.4098	7.00246	1.79709
FKBP1A	686.491	754.577	716.396	375.613	390.087	381.467	2598.95	2398.96	2496.24	1.79643
ZNF697	5.79829	6.11558	6.78738	8.86355	8.03834	9.36387	23.2216	20.0682	21.6693	1.7964
YTHDF3-AS1	0.687074	0	0.48959	0	0.825897	0.85826	1.03351	1.21463	1.83129	1.79366
MTRNR2L8	0.189301	0.29391	0.809346	0	0.455099	0.567519	1.13901	2.09157	1.24198	1.79087
EML6	0.800843	1.24339	0.760879	0.552643	0.427846	0.533533	2.81084	4.01129	2.84603	1.78518
CDYL2	3.14409	3.68461	3.8776	2.34699	2.25307	2.49241	12.8012	11.0362	13.004	1.78287
LYPLA1	21.9465	21.5556	19.4461	10.6672	15.4461	13.5404	75.2827	68.7391	72.5807	1.78281
MT2A	464.605	530.108	469.148	242.652	295.24	286.947	1657.37	1696.63	1654.58	1.77462
RALA	32.16	33.5094	31.9791	29.2555	29.3065	29.6133	111.18	110.83	110.626	1.76827
LYPLA1P3	0.354906	1.10206	0.842988	0.367368	0.568819	0.177333	3.20315	2.6665	1.89189	1.75474
LINC00936	0.441434	0.421767	0.483929	0.140595	0.326539	0.407201	1.94097	1.56075	1.03037	1.75029
SNHG21	0.830504	0	0.39453	0.859667	0	0.622455	0.936947	1.65171	1.53248	1.75022
RP11-73M18.10	0.691569	0	1.31412	0.477236	0	0.230367	2.42731	2.03762	2.26864	1.74728
RIPK2	10.5002	10.8931	11.8354	8.29991	7.95554	9.15761	40.6354	34.9313	35.8151	1.74501
RN7SL471P	19.3863	16.0102	19.2026	5.97742	5.28869	5.77072	49.6363	59.4283	73.7434	1.74338
CD82	83.901	87.5551	87.337	171.321	146.228	154.859	308.963	275.976	279.555	1.74006
PTPN12	29.2573	26.3105	29.7927	35.9069	30.4099	33.0369	93.3569	97.0104	94.7292	1.73981
NUP50-AS1	1.604	2.02919	1.80617	2.21377	1.42821	2.37468	6.25534	5.98624	5.89517	1.73741
SOWAHC	3.89295	3.74165	4.0761	5.8663	6.23936	6.21921	13.106	12.6873	12.9877	1.72752
SERPINB8	9.25772	10.078	10.2111	6.90255	7.95889	7.55002	32.9734	31.3211	33.3945	1.72519
SH2B3	13.1178	13.5306	13.1784	18.9389	19.5617	19.5379	46.2588	40.2697	44.9402	1.72291
PLOD2	84.5841	84.446	77.167	41.5327	44.3008	44.0657	276.17	269.899	263.246	1.71689
VEPH1	5.11421	4.42733	5.88969	2.24585	3.57674	2.50891	16.6913	15.9724	17.8698	1.71139
SLC35E4	3.4536	5.36207	5.35362	3.10449	2.40344	2.99714	17.3622	14.1387	14.8697	1.71044
CD9	54.3729	54.3928	57.3828	48.406	41.9212	40.554	190.404	173.327	179.341	1.70867
MAFF	10.8533	11.6615	11.7033	18.1928	21.4277	23.3432	37.3969	35.9503	38.4678	1.70828
AC073130.3	1.4808	1.31377	1.20592	0.437943	0.339047	1.057	3.18208	4.48766	5.37813	1.70556
OAF	16.2649	17.7453	20.5115	27.4028	23.2501	25.2838	58.3364	59.0611	60.3256	1.70473
RP11-342M1.3	0.479883	0.372533	0.227968	0	0	0.959114	1.08278	1.06043	1.37744	1.7043
ARHGAP24	5.58305	4.47791	5.53069	3.83447	4.79213	4.09851	16.6371	16.9799	17.0996	1.70168
SLC4A7	10.024	8.07867	8.197	4.91078	7.29707	7.26439	29.8977	29.2188	26.2939	1.69937
IRGQ	11.7347	13.7283	13.1479	13.6099	12.6438	13.0079	40.8905	41.4608	42.5924	1.6942
NMNAT2	0.498028	0.281178	0.602223	0.140595	0	0.0904891	1.46424	1.48071	1.50379	1.68724
PPM1H	0.213541	0.271264	0.258217	0.120567	0.0622272	0.0969984	0.730031	0.737847	0.923394	1.6863
TRPV2	19.8522	18.9573	20.2386	7.63781	8.93996	9.52436	58.7334	66.153	64.9797	1.68502
TMX4	9.47615	9.12559	9.82001	12.6233	13.3613	13.8649	31.666	27.7259	31.4957	1.67709
POC1B	2.66088	3.2788	2.7488	2.84176	3.14774	2.70129	9.08518	8.66128	9.99312	1.67477
CSRNP1	6.11165	7.72498	6.77443	6.9751	7.53487	8.37823	20.3313	21.851	23.4224	1.67038
PHKA1	1.80283	1.654	1.81018	1.0603	1.80591	1.82208	5.54698	5.46874	5.72923	1.66867
RP11-295G20.2	2.38703	2.88253	2.26791	3.29446	1.27526	1.85532	8.77708	8.20525	6.96041	1.66744
SLC35F2	3.85163	3.86589	3.84424	3.22172	2.6189	3.84901	11.9385	11.7954	12.954	1.66595
OLFM1	0.77001	0.597759	0.853514	0.265683	0.822746	0.641239	3.08871	2.26873	1.68397	1.66447
RAB3D	1.81834	1.70286	1.91956	2.33033	2.91432	2.85546	6.64261	5.02586	5.53887	1.66114
MTFP1	0.270065	1.25791	0.684235	0.745463	0.865685	0.629725	2.1666	2.38714	2.4363	1.65981
DOCK4	5.39434	5.89595	5.99476	5.92645	6.92903	6.69456	19.5094	16.7659	18.3186	1.65922
DUSP2	0.80369	0.453749	0.347083	0.45377	0.7026	0.657118	1.53864	1.42078	2.09717	1.65602
AC112721.2	0.911866	1.06182	1.08295	0.471943	0	0	3.42912	2.82103	3.36522	1.6534
SHANK1	3.63417	4.36187	4.35887	2.50786	2.43724	2.60143	13.8022	12.8264	12.1964	1.6519
FKBP1C	15.465	15.401	14.9901	7.11471	7.26064	7.57117	51.8128	45.2896	46.8886	1.65079
PSG1	0.783238	0.561257	1.20209	0.249459	0.386252	0.421457	1.99382	2.92902	3.06346	1.64896
KCNC4	2.77571	3.23218	2.69713	1.56719	1.4155	1.44995	8.16078	9.64664	9.46765	1.64766
CITED4	2.81147	3.49208	2.76021	4.65631	4.20563	4.4953	8.45815	9.69185	10.1451	1.64237
TTC14	11.6438	11.2324	11.7948	10.4574	11.8009	11.2081	35.8668	36.4006	35.8443	1.64072
CTSB	1414.37	1478.18	1470.02	2504.85	2564.85	2598.07	4660.94	4367.77	4514.83	1.63435
RNF19B	5.25115	4.71226	4.53139	4.78727	4.40113	4.62173	16.0152	13.9247	14.974	1.63162
CLCF1	4.61484	6.1266	5.84606	4.29227	3.75177	4.94589	17.7065	16.9667	16.6744	1.6302
PQLC2	7.72093	5.19813	8.56905	8.62858	8.32272	7.92053	22.6113	22.4669	21.3494	1.62824
RP11-363E7.4	0.690396	0.779571	0.894468	1.03947	1.10652	1.75618	2.07702	2.33004	2.88246	1.62433
HTATSF1P2	1.75906	2.73112	1.85698	0.809258	0	0.781275	8.23207	5.8739	5.44989	1.62342
SEMA7A	37.1736	40.613	35.982	4.92898	3.40889	4.21924	118.997	111.005	119.914	1.62091
DIO2	3.2762	2.90219	2.84536	2.37179	2.48047	2.41029	9.94697	8.79421	8.98357	1.61938
SLC19A2	2.3853	1.87779	2.04283	1.66922	1.50766	2.14867	6.82228	6.05791	6.47473	1.61792
SQSTM1	249.606	268.408	261.195	417.218	396.617	402.524	792.621	800.018	791.248	1.61323
AGO2	1.71703	2.10117	1.67152	1.54093	1.78943	1.78348	5.77629	4.9942	5.97247	1.60875
SPRED2	10.8971	10.4224	10.1531	15.4551	14.5704	14.4695	31.3343	32.781	31.7724	1.60725
RHBDF2	1.89738	1.79627	2.50619	2.49094	2.37346	2.58979	5.98662	6.70847	6.18626	1.60666
TIMP1	1075.82	1118.2	1161.51	1442.33	1380.55	1452.43	3453.46	3310.95	3436.38	1.60407
MXD1	15.7748	14.4725	13.2163	16.3287	17.6979	16.4806	42.2803	45.8867	43.8681	1.60304
ENTPD7	4.86371	4.31509	4.91806	4.17144	3.78625	3.88833	13.6393	13.8799	15.2997	1.60288
DBNDD2	0.772191	0.85636	0.838464	0.456746	0.88401	0.55119	2.15716	2.43767	2.89498	1.60216
ZFHX2	0.590995	0.896726	0.752923	0.611747	0.861096	0.604016	2.46492	1.88772	2.44542	1.60121
MPP4	1.40261	2.1777	1.80855	0.311114	1.92687	1.50178	5.27461	5.71187	5.34064	1.59922
IGF2R	20.4262	20.7516	20.3413	24.3795	32.1184	28.0121	67.6727	55.4999	63.0815	1.59817
ALAS1	15.3219	17.6614	15.8256	26.0728	24.743	31.203	49.238	49.8637	48.5965	1.59744
GNG11	16.915	19.3676	19.6762	21.7294	25.9455	23.5196	55.5028	54.988	57.3754	1.58488
SLC31A2	0.483647	0.214546	0.525155	0.286074	0.553683	0.483318	0.623582	1.16036	1.86988	1.57857
AHNAK2	2.63678	2.76754	2.79917	1.12795	1.60633	1.49898	9.02535	6.65313	8.78765	1.57648
SRD5A3	3.17891	3.51888	3.32789	2.19369	2.02854	3.02968	10.1834	9.99066	9.67984	1.57422
ATP6V1B2	32.4733	31.6362	31.994	28.4183	30.6638	31.894	97.8877	92.0256	96.2534	1.5742
NCR3LG1	1.05361	1.36815	1.16484	1.15009	1.0746	1.64634	3.37144	3.62359	3.61339	1.56452
KCNN4	0.829108	0.804547	1.1816	0.429111	0.166105	0	2.80612	2.83982	2.63483	1.5565
HAS2-AS1	2.35118	1.65929	3.45231	0.442497	0.685146	0.213598	4.82276	8.69078	8.41402	1.55496
EXOSC4	13.6261	16.8383	14.135	11.5139	8.91385	7.3642	45.8037	44.7357	40.4802	1.55469
TMEM38B	16.706	20.2162	10.5038	15.7668	11.8126	15.9582	50.6287	43.6485	44.5273	1.5493
KCTD13	6.29458	6.13652	6.05	7.12171	7.0385	6.87545	18.7167	17.9855	17.2874	1.54663
CDKN1A	1409.31	1479.87	1476.53	911.378	901.927	934.957	4322.14	4095.55	4294.58	1.54194
RAB6B	0.803452	0.519767	0.720948	0.739257	0.572319	0.490665	2.28285	1.89381	1.77541	1.54188
PRKD3	11.2613	9.96422	9.87486	14.7485	15.2348	15.5293	30.2969	30.5399	29.4609	1.53776
PKIB	2.77246	2.63826	2.88902	2.77724	3.15346	1.96622	9.01344	8.61666	6.38106	1.53257
ZC3H12C	2.64668	2.5873	2.2352	2.55118	3.27683	3.44255	7.39366	6.56031	7.62567	1.53065
NFASC	1.17887	1.24617	1.45367	0.778893	0.562804	0.476241	3.207	3.65814	4.34031	1.53055
NUMB	33.4738	33.9221	32.9078	25.978	28.7154	30.5467	95.5608	97.2863	96.1803	1.52683
SIGLEC15	0.940851	1.33904	1.63882	0.162315	1.25661	0.235053	4.24575	2.70279	4.30808	1.52233
RP11-350J20.12	0	0	1.50225	0	0	0.790039	0.594601	2.0964	1.62089	1.5212
STEAP1B	4.75538	5.29666	4.02698	0.856064	1.49118	1.13639	11.9738	13.7065	14.6671	1.51893
SRXN1	2.42271	3.90345	3.34414	2.08194	1.90485	2.14699	8.73257	9.09112	9.82194	1.51542
MYC	23.1319	22.4115	21.4037	24.1317	28.9431	28.4878	65.2302	63.2615	62.6575	1.51361
ATCAY	1.16349	0.361287	0.884342	0.963476	0.372952	1.1627	2.10018	2.67389	2.0992	1.51249
ADGRL4	30.0324	29.4294	28.2998	17.8368	18.5434	17.712	84.0559	83.337	82.5702	1.51005
STX1A	3.23778	3.19899	2.79655	2.43743	2.35877	2.94144	7.08412	9.78252	9.41431	1.5091
AC020571.3	1.28469	0.498652	0.915432	0	0.257376	0.160477	3.14024	2.69693	1.84376	1.50898
SLC8A1-AS1	3.60087	1.39768	2.56588	3.72731	4.32842	6.29725	5.41651	7.16141	8.85929	1.50281
UBALD2	13.3936	17.6697	14.0493	16.188	18.7366	16.7113	43.3219	41.5384	42.9844	1.50279
BHMT2	0.421126	0.46703	0.571587	0.373641	0.482109	0.42084	1.35743	1.22307	1.52949	1.49342
MPHOSPH6	20.8108	21.982	22.3654	24.3667	19.6844	24.3765	63.6346	57.1449	62.5327	1.49228
ITPR2	1.23276	1.30957	1.38699	1.41037	2.27041	2.00998	4.26173	3.11601	3.6715	1.4916
AC007879.7	1.83618	2.85085	1.88992	0	0.245242	0.305822	6.21454	6.35682	5.77246	1.4798
LINC00920	0.574429	0.981045	0.218305	0.832439	0.920655	0.861058	1.98736	1.62478	1.31906	1.47511
SLC43A3	5.69954	5.01095	6.39375	3.41186	6.05321	4.8722	16.4237	16.449	14.5295	1.4706
CLDN16	1.06687	0.331284	1.21635	0.883464	0.683961	0.639686	1.92577	3.39486	1.92488	1.47055
DHRS7	21.6704	25.0692	24.3232	20.672	20.6007	20.7003	64.475	65.9616	66.4272	1.47003
CARD6	1.75309	1.81457	2.13753	1.99611	1.91998	2.39426	5.01037	5.39769	5.36748	1.46734
PLD6	0.963515	1.12197	1.09852	0.897613	0.926553	0.722145	2.89868	2.98081	2.92368	1.46718
BCL2L2-PABPN1	0.695656	0.771483	0.66094	0	0.318557	0.595872	1.3454	2.98665	1.54853	1.46641
ABTB2	2.41527	2.92965	2.46207	3.4897	2.90328	2.38849	7.15268	6.82719	7.57235	1.465
SCARB1	10.8548	11.6764	10.2427	7.28612	6.3533	8.21888	30.1484	29.7992	30.3825	1.46266
ULBP2	4.93685	2.55499	5.03793	1.51414	0.732634	2.10131	12.3769	11.2326	10.8716	1.46044
DYRK3	8.66673	7.52473	8.18006	4.60357	6.67107	6.15376	23.7576	20.6131	22.5387	1.45701
PCDHGC5	0.595796	0.764159	0.762956	1.01892	0.830349	0.543619	1.63656	1.85466	2.31561	1.45171
MMP14	175.973	178.553	178.369	187.249	164.403	168.06	489.141	473.673	492.763	1.44967
ACER2	1.04704	0.941155	0.837714	0.912676	0.794898	0.991256	2.73548	2.53291	2.44046	1.4478
FAM180A	1.29697	1.64755	1.12022	0.976371	1.13383	1.29609	4.43393	3.12656	3.48104	1.4417
CTH	2.39631	1.98427	2.4285	1.65363	2.56042	3.35255	5.52702	7.0604	5.89567	1.44067
F3	80.2965	84.7311	79.2611	131.624	164.476	158.706	219.99	229.799	213.211	1.44042
ADORA2B	1.706	1.32437	1.75594	1.03011	2.39248	1.98899	5.23934	3.89555	3.84753	1.43957
ATP13A2	6.71248	7.82883	7.44551	7.44686	6.74325	6.64374	19.4695	20.0424	20.097	1.43889
TRAF3IP2	3.15059	2.5765	3.22186	3.73422	3.58479	3.12441	8.50159	7.92935	7.83034	1.43887
ODC1	52.8092	57.5962	56.0039	16.3606	21.2342	19.9294	147.825	154.5	148.646	1.4383
USP53	17.3064	15.742	15.7784	18.8188	21.7604	21.8658	42.8618	45.0163	44.0606	1.43412
ZNF432	3.77122	3.52161	2.59639	4.63911	3.89811	3.76866	7.85142	10.894	7.9337	1.43178
PHLDA2	72.5774	78.7984	76.9308	25.3984	31.0468	25.9398	208.049	205.583	201.228	1.42929
ABHD6	3.22983	3.08593	3.02144	3.39468	2.78737	3.07867	8.81983	7.94975	8.35392	1.42797
PCNX	28.4736	29.8178	28.322	29.6751	33.9478	33.0993	83.9027	69.9442	79.1161	1.42744
PRKCH	1.48335	1.31603	2.21465	2.19348	1.35852	2.32939	5.73759	3.74614	3.99708	1.42686
GPR3	1.39949	1.44856	1.27425	1.08647	1.49534	0.932358	3.77171	3.76261	3.49101	1.4193
SLC39A14	21.897	21.9497	22.2686	12.5983	14.992	14.3668	61.5587	56.7495	58.145	1.41623
ITGA2	38.4769	38.5446	37.9267	18.4296	28.0081	26.9234	105.217	97.7082	102.904	1.41175
AP1AR	4.16483	3.23316	3.31095	2.37549	2.79264	2.84545	8.75797	9.57899	10.1422	1.41109
ERCC1	14.6913	15.7067	14.9989	12.5393	12.2895	11.6871	40.5149	39.8403	39.6859	1.40286
PTRH2	37.994	40.2628	35.525	39.9524	43.4959	55.1444	101.603	98.6178	100.402	1.40168
EAF1	4.70705	5.5934	5.34659	4.35516	4.2146	4.38851	13.7258	13.3186	14.2765	1.40098
PMAIP1	30.2627	32.5362	27.4291	27.0001	34.7029	29.04	85.139	76.1633	76.5845	1.39863
GALNT18	3.29996	3.59411	3.60323	3.87468	3.07864	3.83914	8.66826	9.49072	9.4923	1.39733
DEDD2	9.69863	8.74998	8.1562	7.19023	7.56209	7.66195	22.4748	23.575	23.9692	1.39606
HDAC9	6.35217	6.60022	6.22088	2.63009	2.19279	2.83212	14.9941	18.0968	17.3114	1.39439
PTPN3	1.47071	1.63102	1.79655	0.869918	2.35716	2.30955	2.84436	5.19992	4.82456	1.39353
MRPL36	42.4578	45.2024	47.8306	43.5301	44.7176	39.6004	121.041	114.374	119.548	1.38948
AFP	0	1.94398	1.1896	1.29605	3.01012	1.25123	2.82511	3.32018	2.05368	1.38763
GLA	13.9859	13.3953	13.6331	14.289	11.0622	10.0739	34.6988	36.6854	35.6758	1.38422
ATP6V1G1	65.4333	65.955	65.3144	61.4662	76.5035	73.1489	174.35	165.437	172.131	1.3799
GSTO1	188.49	207.585	201.79	113.424	118.165	106.122	508.048	516.564	526.242	1.37517
DBNDD1	9.66015	8.46533	9.347	8.09764	9.7835	9.35747	23.4457	23.6255	24.1072	1.37345
CCNJL	2.11741	1.73026	1.72939	1.69189	1.60751	1.93036	4.97316	5.05661	4.38695	1.37016
FLNB	25.1575	23.6064	23.0464	14.6322	16.0989	14.2178	62.7111	59.6675	63.21	1.36985
CTC-459F4.3	3.95409	3.80041	4.65123	1.16941	1.20711	3.57508	10.4795	9.98589	11.5813	1.36917
RASA1	33.6593	33.9891	34.1657	21.2994	25.8671	25.1945	86.775	86.9893	87.9614	1.36212
TNFRSF10C	3.17758	3.54597	4.05679	3.28916	5.41111	3.77082	8.514	9.21604	9.93519	1.35967
APCDD1L-AS1	1.41487	2.19674	2.18443	0.488186	0.094486	0.176739	4.61128	4.63773	5.60834	1.35804
HBEGF	8.52868	9.46978	8.39773	2.35418	2.31962	3.20254	21.5372	23.6209	22.4245	1.35632
GRPEL1	12.4885	13.1105	12.9632	9.6608	9.68735	11.503	33.8942	32.7627	31.7463	1.35152
TAF13	71.0637	66.0222	63.7059	37.2541	38.9451	40.3184	178.619	167.774	165.815	1.35103
PLAUR	71.2048	67.9502	73.6317	17.1028	20.3339	20.1479	185.959	178.471	178.251	1.3507
CPEB4	3.84959	3.63459	3.44742	3.33859	4.04376	4.02893	9.78148	8.54122	9.55653	1.35069
TIPARP	31.3774	28.8559	33.5721	38.2388	39.6249	39.0948	80.6777	77.7285	80.8207	1.35064
DUSP3	29.9473	29.4445	30.0778	24.1033	25.5377	27.5879	74.9735	73.2321	79.9304	1.35043
HIST1H2BJ	2.85606	3.0234	1.97348	3.22511	1.66454	2.85412	6.6395	6.77026	6.60094	1.34947
SEL1L3	11.3507	10.4637	10.888	6.43951	5.85997	6.65311	26.8833	27.7114	28.7095	1.34899
ABRACL	25.9795	20.8478	18.859	17.2228	15.6728	18.3775	58.1794	53.5387	55.5392	1.34841
PPP2R2A	21.2228	19.6828	20.7287	14.0621	16.2547	17.6736	53.5358	50.5221	52.8051	1.3477
BAK1	9.23819	8.06807	8.11889	5.25942	6.2927	5.65455	22.5815	19.1385	22.8236	1.34402
CCDC86	18.633	17.2971	19.684	12.004	9.50211	10.0915	46.4524	46.5881	48.0338	1.34293
AC079922.3	0.731928	1.04169	0.927203	0.378815	0.97757	0.853336	1.92672	2.37218	2.5511	1.3427
PALM2	2.33371	1.44933	2.19117	1.3073	1.45212	1.67365	5.69927	4.44108	4.99863	1.34145
ATP6V0A1	18.3691	19.5403	19.5808	14.756	14.6878	15.8738	50.7901	47.666	47.1981	1.34116
PFDN2	108.518	107.943	104.252	82.6039	89.1429	84.2786	279.183	265.318	263.766	1.33355
MTF1	3.49631	3.4828	3.5423	4.03543	4.48787	4.42152	9.12219	8.17731	9.17295	1.33116
RP11-680F8.1	0.536217	0.454108	0.74103	0.706422	0.234385	0.389711	1.02657	1.68043	1.63908	1.32782
OSTM1	11.3197	10.5022	10.2827	10.6884	12.1687	12.5536	28.4482	26.3563	25.5859	1.32424
TMEM255B	2.31021	2.20729	2.70145	1.83949	1.13928	1.59829	7.48478	5.1836	5.39238	1.323
UCN2	0.832747	0.387877	0.632952	0.689591	0.133467	0.0832182	0.626318	2.50265	1.50247	1.32115
PAG1	1.42339	1.53271	1.75588	1.71101	2.00535	1.57155	4.14405	3.84548	3.75617	1.31772
SLC2A13	2.32465	2.51554	2.3927	1.96878	2.82257	2.81585	6.22535	5.60396	6.16711	1.31507
MLLT11	18.8854	17.856	18.4893	7.83193	8.87672	8.01478	43.4766	46.3605	47.5312	1.31451
ZNF385A	3.85243	3.63727	4.05588	4.74214	4.92284	4.05791	9.31885	9.52538	9.77706	1.30975
TSPAN13	9.66369	9.88059	9.12545	3.0497	4.43872	4.18083	25.3499	21.9275	23.7274	1.30839
GRB10	5.75194	5.71228	5.98185	5.47116	4.4433	6.60247	14.888	14.1991	14.0666	1.30658
EGFL7	1.97328	2.07251	2.59164	2.40302	1.86037	0.927971	5.67459	5.02741	5.71163	1.3062
SH3RF3-AS1	2.53734	2.62631	3.36039	5.09369	4.1899	3.765	7.40211	5.91278	7.69296	1.30132
HSPA4L	4.0021	5.57961	5.43197	5.57986	7.91968	5.59097	13.0229	11.3705	12.5927	1.30071
POLR1B	4.51867	5.12524	4.75591	4.42527	4.55349	4.97527	11.844	12.0301	11.5612	1.29914
STX3	4.48608	4.87557	3.94255	3.01834	2.57641	2.05472	10.1783	11.0037	11.5277	1.29784
YRDC	10.6715	10.5913	9.30472	6.43196	6.71151	7.15449	23.3672	26.0293	25.6459	1.29571
GAN	0.776677	0.803914	0.853218	0.619711	0.71317	0.671046	1.9715	1.8307	2.16964	1.29496
ANKRD46	6.58344	6.4736	4.86493	3.93733	4.10336	3.58189	15.7347	14.6773	13.5578	1.29478
NOP10	87.7111	85.372	91.3714	60.8346	60.6552	64.0702	225.699	208.187	214.519	1.29388
KRT34	1.19738	1.96841	2.34217	0.145814	0	0.211158	4.55578	4.48253	4.39001	1.28569
TNFRSF10B	59.2191	59.9533	59.5383	65.5181	69.3727	66.1411	142.871	145.503	146.245	1.28213
HIST1H2BN	0.572629	0.777931	0.340033	0.444552	0.91777	0.42918	1.83039	1.39192	0.88053	1.27909
FKBP15	4.98529	5.63119	6.1069	5.88511	5.54368	5.52767	12.8915	13.6281	14.034	1.27796
MYEOV	1.6065	2.11053	1.1154	0.127916	0.198061	0.246986	2.9742	4.53309	4.20587	1.27731
PDLIM4	32.5889	33.3961	31.5788	27.2999	22.954	23.7635	77.2304	79.0127	79.9574	1.27559
TTLL5	103.494	79.0031	108.572	79.453	86.3919	73.6891	236.111	246.994	219.969	1.27232
FXYD5	107.166	106.407	112.107	51.5327	39.1184	49.1046	255.053	260.744	270.025	1.27075
SEC11C	9.54216	9.87678	10.0408	6.58482	5.59118	6.56219	25.7746	22.2197	23.056	1.2701
PPIF	133.33	145.275	129.843	102.523	81.2791	88.5088	320.892	325.986	335.062	1.26548
ZNF121	1.82151	2.001	1.61632	2.09892	2.23085	2.48999	4.42011	4.79978	3.83322	1.26303
SLC26A2	7.1281	7.15688	7.23644	6.76222	8.48882	8.20624	17.748	16.3654	17.4498	1.26057
SMAGP	9.5515	9.3704	8.87541	4.78048	4.37386	4.14317	20.7619	22.3592	23.4136	1.25916
RP11-462L8.1	0.823768	1.09627	0.335425	0	0.377223	0.235203	2.30124	1.45628	1.64069	1.25905
ARID3B	0.895159	0.941495	0.631007	0.717362	0.601648	0.750269	1.73744	2.29715	1.84715	1.2531
SHC3	1.17421	1.2938	1.24757	1.33306	1.39628	1.26173	3.00076	2.76772	3.07531	1.25108
SLC9A1	20.2238	22.264	21.658	23.1523	22.3583	23.481	52.6946	49.2537	50.7156	1.25093
HIST1H2BC	14.7846	15.9811	12.6243	11.2357	13.7975	13.2784	31.8107	37.2198	34.2261	1.2508
NIPA1	2.83498	2.64096	2.93977	2.04579	2.83009	2.07218	6.31138	6.60119	7.08124	1.2484
ARL6	2.45936	2.13382	2.26791	1.34774	3.24611	1.80713	5.76676	5.30677	5.22031	1.24782
TNIP1	51.5869	51.0143	55.221	43.4427	43.6632	42.2164	126.123	127.236	121.033	1.24625
TMC7	0.315306	0.27974	0.385164	0.186502	0.433159	0.315092	0.474291	1.03518	0.812694	1.24431
SNHG9	8.52097	14.6223	13.2089	11.1413	16.532	10.756	31.7063	24.5774	29.7914	1.24356
GPANK1	3.70917	5.00473	3.3143	5.21063	4.67092	4.89807	9.63113	8.89899	9.92242	1.24214
RP11-14N7.2	18.1962	17.788	14.5135	23.2533	15.1219	16.3879	38.5223	40.3089	40.5311	1.24106
STK4	7.38968	6.94432	7.55672	7.93097	7.66722	8.00653	18.1069	16.2264	17.3995	1.24076
ARHGAP22	18.291	20.6726	20.1468	6.12548	5.60445	4.34565	46.3283	47.0367	46.3253	1.24075
CD58	3.81896	3.83662	2.88136	2.0928	1.6202	2.9184	8.10997	8.1412	8.5668	1.23593
EFTUD1	7.68504	7.03404	6.18558	4.86326	5.16349	5.33228	16.9614	15.1283	17.1462	1.23589
SPRED3	2.48423	3.1105	2.74094	1.49311	1.54124	1.44148	5.66552	7.22501	6.70347	1.23304
CPEB1	0.897722	0.597345	0.649846	0.619496	0.822175	0.512636	1.41468	1.58701	2.03339	1.2311
NOP16	16.5474	17.4622	18.1781	6.95843	9.94539	13.1773	41.8091	40.337	40.2878	1.23022
VEGFC	34.7164	38.9644	40.5912	18.8027	17.717	18.6302	85.6571	88.7312	91.3428	1.21749
SUGCT	5.40525	6.29416	6.07702	4.47604	6.06422	5.85172	15.5838	12.5814	13.077	1.21416
ZNF749	1.0488	1.55436	1.26823	0.888245	1.45173	1.57214	3.51382	2.99184	2.4631	1.21206
FGFR1OP	0.74872	0.662334	0.603826	0.486635	0.72558	0.65251	1.75484	1.58525	1.32088	1.20993
CPPED1	3.73548	3.54088	4.20284	2.40139	1.54401	2.14153	8.39892	9.12349	9.02923	1.20978
CDC42SE1	21.2954	21.5677	20.5007	13.9412	14.5225	16.1721	48.4737	50.455	47.3044	1.20654
PIK3CD	5.02516	5.07871	5.24733	3.4841	3.30518	4.33481	12.0872	11.6073	11.722	1.20607
ESRRA	8.56303	9.66907	10.3017	7.0219	8.37713	6.05673	21.3284	21.6256	22.8006	1.20442
DDI2	2.80902	2.5591	2.81221	2.28287	2.34407	2.63312	6.73967	5.66353	6.44463	1.20417
KLHL18	60.5638	65.651	68.2128	61.5506	62.1232	58.1017	154.044	135.098	158.759	1.20395
MAP1LC3B	460.864	464.428	458.166	450.731	429.14	450.551	1067.53	1038.73	1079.75	1.20347
PAQR3	21.2014	20.4729	19.2426	12.8463	18.3713	15.3304	47.3188	48.3739	44.3872	1.20133
BMS1P10	0.991044	0.512899	0.941587	0.911861	0.882432	0.550206	1.98767	1.55732	2.07705	1.20095
SLC36A1	53.7861	49.5831	58.0886	44.3658	44.1126	47.2409	118.831	120.898	130.952	1.19902
GFOD2	12.8843	13.6567	12.8887	11.7979	12.5092	13.2469	31.1211	28.9094	30.3278	1.19638
PSD4	1.62633	1.68336	2.70405	0.561145	1.08607	1.89609	3.26181	5.51053	5.0016	1.19561
FAM91A1	33.5443	30.5692	31.4806	23.5884	29.5109	27.1451	77.7437	70.4997	70.6435	1.19519
EIF4A1P2	0.50545	0	0.576272	0.20928	0.648081	0.404086	0.760309	0.804192	0.91195	1.19494
CCRN4L	6.50767	6.67049	8.22388	2.48519	5.77197	4.48283	16.6318	16.8098	15.4928	1.1931
SLC9A7	8.86895	8.48149	10.0445	4.12452	5.76822	5.36272	22.0414	19.286	21.2934	1.19273
ATP6V0B	152.137	178.437	163.076	116.168	121.677	135.541	378.704	385.655	363.477	1.192
OCIAD2	10.4984	13.007	12.7956	6.14702	5.26879	5.82849	28.3936	27.3703	26.96	1.1883
SH3KBP1	25.6774	24.3653	26.4765	15.6506	14.6233	14.3019	61.4856	55.7852	57.0602	1.18793
TRMT6	7.78711	5.82359	6.93368	5.31743	7.44918	6.02989	16.0065	15.4239	15.3471	1.18707
TCTEX1D4	2.1013	0.752879	0.307144	0.334628	0	1.29223	2.18826	3.2861	1.72328	1.187
C2CD2L	32.5591	34.0838	27.419	19.4044	17.3945	23.6633	75.3193	63.2273	75.2508	1.18456
ARAP2	1.00217	1.75047	1.07118	0.389011	0.501942	0.500746	3.01498	2.76822	2.87661	1.17932
MRPL14	22.8913	21.7639	24.9257	23.4288	14.4281	20.691	49.9093	56.6093	50.9409	1.17822
RGS3	10.5573	10.9275	10.7706	8.00833	8.30958	8.24146	25.619	23.6024	23.6391	1.17559
PWWP2B	3.79854	3.3293	3.7836	4.81977	4.12415	3.85718	7.46486	8.50223	8.64217	1.17336
SCO2	8.57839	11.3886	9.68586	9.78044	12.1548	8.82104	27.3037	21.319	18.2507	1.17326
CCDC184	0.631651	0.490351	0.800173	0.980747	0.674911	0.999435	1.26686	1.16317	1.89941	1.17144
RP11-879F14.3	0.642343	0.997303	1.22058	0	0	0.641907	2.89868	1.41944	2.10716	1.16763
C17orf104	2.90188	1.35164	3.03277	0.600755	2.79056	2.31993	5.23808	5.38651	5.71163	1.16482
ADAP2	8.95692	9.6276	9.81916	2.85275	3.31282	4.81968	20.728	19.4883	23.4495	1.16444
MAP4K4	735.055	712.78	754.511	651.894	696.712	690.975	1641.42	1591.05	1697.13	1.16243
ANKRD42	5.33843	5.93378	5.1873	5.02353	6.51428	6.1229	13.3228	11.8772	11.6417	1.16242
NAV3	36.0247	38.2964	36.8007	9.24862	12.3398	10.6386	93.0795	71.8769	83.3703	1.1601
LINC00941	4.68341	5.45361	5.00591	1.61596	3.12761	3.12016	9.09965	11.7292	12.963	1.15803
MAP1S	79.6901	85.7578	85.528	75.9416	64.5367	68.2594	191.858	177.588	190.53	1.15782
MCOLN1	9.06315	12.2321	11.8751	9.32008	9.3041	9.82654	25.0384	23.7189	24.9215	1.15136
ULK3	4.88994	5.62109	5.94141	5.15898	5.50115	6.0143	11.882	12.2187	12.4164	1.15027
ZPR1	7.90769	7.46565	7.88783	5.32729	5.6596	5.98774	17.8282	17.0841	16.6981	1.14974
UBE2E1	51.8296	49.9298	49.5533	54.7479	46.9633	47.2267	110.253	112.909	112.389	1.149
POLR3A	10.1041	9.7183	8.32933	6.57529	7.0552	6.23655	21.1499	20.1936	21.036	1.14785
SMIM4	23.5662	20.7337	19.778	9.75749	15.7376	16.4852	47.2651	47.5628	47.0285	1.14653
STXBP1	144.184	149.704	154.884	119.305	126.146	120.333	336.289	316.137	340.578	1.14581
AGTR1	1.35929	1.21756	1.44048	1.08233	1.08929	1.0449	3.06702	2.72647	3.08704	1.14441
GPRIN1	4.07097	4.63813	5.39824	2.97096	3.80215	3.86333	10.1326	10.1997	10.8325	1.14347
MAN2A1	27.0337	26.7919	29.5512	27.135	32.6123	33.142	64.038	59.5166	60.5301	1.14265
CLDN12	26.5111	23.8735	22.4678	16.0262	15.6364	14.3063	58.3824	49.679	52.6155	1.14111
DCBLD1	127.041	120.312	126.923	56.9388	64.3722	59.1145	280.079	266.647	278.726	1.14109
RAB31	16.8495	15.7247	15.8064	14.9226	10.6266	13.1604	36.1424	34.5453	35.8929	1.13944
TSPAN14	4.16866	4.12947	3.92443	4.8278	4.89795	4.50854	9.14796	8.50114	9.19998	1.13533
HTRA2	3.95488	5.00924	4.40025	3.01645	4.83736	4.31621	9.08008	9.65935	10.5411	1.13155
VIM-AS1	1.00417	0.708668	0.78059	0.755947	0.58524	0.456129	2.05976	1.37174	2.02137	1.12889
FAM222B	8.95112	9.47977	8.02571	7.85414	8.69326	8.38228	19.4388	18.8892	19.4946	1.12801
MICA	37.4617	31.2229	35.0004	12.7108	10.5535	13.0716	77.4989	73.0684	75.9671	1.12752
HIST2H2BE	13.8282	15.3605	14.7938	10.8226	11.1716	12.583	31.6239	31.5014	32.9615	1.12741
ATP6V1C1	53.4073	50.7728	53.6305	46.9478	48.9882	51.7289	117.786	110.175	116.642	1.12674
USP12	13.6426	13.4135	13.4293	12.0557	11.9624	11.8028	29.1577	29.6275	29.5964	1.12634
LYN	3.9195	4.50154	4.132	3.66809	2.15134	3.27297	9.12636	8.77986	9.42303	1.12241
SFR1	4.97298	6.94895	7.5597	7.20664	6.7748	6.46048	16.083	10.5496	15.7017	1.11971
RP11-366L20.2	1.21441	1.25699	1.28201	0.279345	0.865053	0.53937	3.24754	3.33956	1.54924	1.11618
CLUH	14.6754	14.3867	14.1442	12.9511	12.3258	11.9157	31.5914	30.3298	31.4964	1.11245
MTAP	6.06375	6.63088	6.14395	4.5459	4.90771	5.87845	13.3031	13.5687	13.8283	1.11134
RRP12	22.2367	21.7525	26.9888	15.8328	14.4206	17.4047	53.5568	50.7286	49.0169	1.11094
RSL1D1	25.1923	26.1223	26.521	24.0746	24.3701	24.2761	57.3159	54.8145	55.7461	1.1089
ZNF143	33.5546	32.0862	37.3694	26.6822	38.1083	33.7539	73.2034	74.4429	74.3541	1.10777
RHBDF1	25.1029	26.1752	22.4012	31.6591	27.2846	31.4706	46.1929	60.7731	51.6873	1.10655
ISG20L2	7.68386	7.71231	9.99198	9.23912	6.84176	9.30745	17.1039	17.6657	19.8277	1.10467
TMEM206	3.88676	4.71936	4.54498	4.1264	5.19119	4.88005	10.0441	9.33765	8.86794	1.10305
CRLF3	25.2803	21.6426	24.0187	13.6954	17.4187	16.5273	51.8875	47.197	53.0907	1.10103
ISCA1P1	2.86814	2.47393	2.11945	1.31949	1.53228	0.955396	4.31431	6.1971	5.48841	1.10052
WDFY2	48.083	35.8726	33.8177	23.2698	19.0158	23.0891	91.1139	80.3106	80.6587	1.09789
EME2	14.092	13.3448	10.635	10.966	8.81001	10.387	24.5049	32.5094	24.1794	1.09264
PVR	47.5515	53.0967	50.077	40.9282	46.7261	52.0784	108.52	107.177	105.463	1.09137
DDX10	7.89704	8.15442	7.93374	6.64898	7.63044	6.7589	15.9712	17.267	17.7559	1.08818
LYPLA2	24.189	24.4378	26.5425	21.8645	18.8928	19.3381	52.0673	52.5188	55.0981	1.08701
IFNWP19	2.61477	2.70646	2.27726	0.902194	0.349231	0.653248	4.58872	6.54846	5.00357	1.08692
PAM16	9.22723	8.38608	7.69765	3.2614	3.96772	3.59843	19.9734	19.495	14.2118	1.08463
HAS2	9.83107	9.13996	8.5015	0.670294	0.518929	1.00009	20.1012	18.5504	19.6011	1.08433
MAPRE3	16.1659	13.764	14.3063	12.82	12.7458	10.8785	32.3574	30.4797	30.9525	1.0842
PDCD11	12.1552	13.7684	12.6926	9.57503	9.43448	8.80466	26.6501	27.3503	27.7271	1.08161
RP11-10C24.2	1.22839	0.381439	0.466834	0.508608	0	0.24551	1.47821	1.30294	1.61185	1.08094
EDEM1	127.996	125.697	139.82	90.3283	109.746	114.299	288.327	256.035	286.987	1.07904
AGTRAP	15.6041	18.6637	14.6057	15.7931	19.2663	19.1742	33.2085	35.0434	34.9784	1.07874
FAM83G	9.25091	9.30867	8.96727	4.75151	4.27911	4.16593	19.4816	18.4862	20.0136	1.07475
CSTB	40.4828	39.8368	39.9794	34.3497	29.7	34.3015	80.7932	84.922	87.5361	1.07395
RP11-1149O23.3	1.23577	0.383732	1.40892	1.535	1.18836	1.23493	2.9742	1.96616	1.41885	1.07028
S100A16	121.823	133.336	123.31	44.5586	41.3957	48.7177	264.352	261.307	267.51	1.06745
COL7A1	58.918	59.7095	48.2381	62.7517	61.6374	80.4602	82.3563	163.1	104.095	1.06682
ZNF710	5.55612	6.22099	5.32961	5.75122	4.58092	4.96508	12.2552	10.9792	12.5745	1.06575
RPGR	1.54758	1.84828	1.65885	1.39654	1.65357	2.14134	3.04417	3.82316	3.7099	1.06526
MYBBP1A	42.2845	40.696	41.4078	30.3314	25.4636	29.0354	89.9216	85.6255	84.3116	1.06288
EDEM3	14.929	13.7407	13.8273	11.7334	13.9552	13.0965	30.6593	28.3515	29.4574	1.0578
RPF2	41.2512	35.7521	38.9242	22.5197	27.3968	25.8351	84.7889	73.9238	82.3746	1.05633
AC046143.3	0.888178	1.96998	1.92881	2.62676	1.01679	1.52156	3.24461	3.47674	3.22577	1.05517
TSC22D4	73.6738	81.2141	77.4169	71.3801	73.2091	68.3228	161.8	161.5	159.389	1.05507
RNASEK	3.50196	5.43715	4.19516	3.78253	2.68434	4.56467	10.5354	8.88251	7.86672	1.05475
TUSC2	33.1246	29.1586	28.3806	38.2675	34.1292	30.8854	60.9487	65.0939	61.8503	1.05131
FBXO28	12.3533	11.7678	12.4892	11.0541	10.6248	11.5762	25.6271	25.3983	24.8081	1.05058
ASPHD1	14.7996	20.5071	16.4801	9.2245	13.2627	12.5632	30.64	37.1346	39.2828	1.04773
PSENEN	10.6178	11.874	9.59412	9.22291	10.1153	9.64599	23.2313	22.3144	20.7646	1.04729
SNCG	5.38726	5.97448	7.12923	0.796633	1.85022	0.961358	10.7084	12.5849	14.8323	1.04394
MRPL15	29.9992	33.2214	31.0561	21.3695	26.7114	23.9615	62.4315	64.153	67.1939	1.03944
GM2A	84.7475	87.9502	89.6296	79.8744	86.8581	79.1182	177.129	175.84	184.729	1.03543
IDS	13.6296	14.4007	11.8882	12.7677	13.4388	13.5394	28.4641	26.527	26.8026	1.03493
SLC25A20	13.3816	11.0564	14.7213	12.9605	12.0405	13.3725	27.898	26.9765	25.2217	1.03238
AHCY	47.1335	51.1989	52.3817	43.6059	40.3077	41.3504	102.67	99.551	105.627	1.0304
ARNTL2	7.83422	6.57559	7.68504	3.31146	4.22423	3.81454	15.2842	14.46	15.2945	1.02746
ZCCHC6	8.25216	8.46349	7.9427	7.27067	9.49647	7.92358	16.9181	16.7023	16.5392	1.02445
TIMM8A	3.77994	4.60294	4.43632	2.91532	2.96972	2.96265	7.80414	8.64764	9.54299	1.01991
CDR2L	19.0436	20.4695	19.4519	11.6974	11.8509	12.0946	40.1356	39.6466	39.5592	1.01716
FAM207A	13.1712	14.2527	13.1459	9.0891	7.03661	7.31234	24.8155	28.5761	28.4773	1.01291
LYAR	23.273	21.3637	19.3678	14.419	16.3359	14.5994	41.1405	46.9986	40.9589	1.01222
SMTN	316.264	325.216	297.795	99.0664	93.7774	89.7719	617.403	644.847	629.159	1.00984
ARHGAP29	56.8532	60.6131	57.4529	30.6611	31.9414	32.4655	119.913	114.683	117.152	1.00785
RELT	1.39553	2.1667	1.49162	0.577813	1.28608	1.0808	3.72605	3.08381	3.34761	1.00709
LPCAT1	12.9485	14.8134	15.9158	16.7938	16.6306	16.1253	30.787	28.6425	28.3418	1.00685
MT1E	53.2561	60.9261	60.585	26.1124	23.0234	25.7346	111.204	120.936	118.815	1.00585
GALNT6	13.2401	14.0109	15.3923	2.54978	2.92302	2.81665	29.1438	27.1328	29.331	1.00542
ARPC5L	18.9398	18.4837	19.35	14.8691	14.3498	15.584	38.8495	38.6132	36.4714	1.00491
SLC37A2	0.466195	0.658014	0.684529	0.263218	0.203778	0.254116	1.02002	1.46099	1.14699	1.00419
RPUSD1	14.1667	15.7869	14.3281	13.9546	11.4442	12.4445	28.3558	29.8409	30.5913	1.00366
ADAT3	1.37033	1.77298	1.37428	2.04887	0.732091	1.52156	2.74838	3.49917	2.80954	1.00349
TMEM99	12.1308	10.314	10.1534	13.1547	8.56393	11.1124	20.637	23.3598	21.3183	1.00262
TRNP1	109.976	126.546	123.339	50.334	44.419	45.7609	235.447	235.619	249.708	1.0021
RP11-783K16.5	8.51638	7.83559	9.88948	0.652995	1.01107	1.26083	15.1829	18.9587	18.3662	1.00068
BLZF1	36.5704	35.7828	35.4693	24.4477	26.8641	22.9362	73.0602	72.0578	70.6052	1.00052
SDHAF3	2.03554	2.32381	1.36515	2.3549	2.11098	1.13674	4.14258	3.28096	4.0261	1.00008
NCEH1	17.8666	16.7092	17.575	4.0311	4.55468	5.36424	37.1664	33.4457	33.5994	0.998751
MRPL52	18.7437	18.4847	19.7226	12.2605	13.6017	13.2398	37.746	36.8592	39.1055	0.997576
POLR1C	31.6889	28.2569	29.9041	29.2555	22.6491	28.8858	59.906	63.78	54.6105	0.988689
CMAS	25.1905	22.9307	23.9334	15.145	17.4768	15.8627	51.5955	46.7284	44.4873	0.986947
UCHL3	19.1374	20.3587	15.8254	11.7389	11.36	12.7496	34.6509	36.0243	38.9461	0.986614
PMEPA1	4.45464	4.90068	3.79701	4.00504	4.24296	4.3753	8.95988	8.10001	8.99749	0.986374
NEU1	7.80163	8.83572	7.76769	8.07558	8.00765	8.67742	16.1161	15.7993	16.4336	0.986306
BAK1P1	1.55132	2.40858	1.28967	3.21159	2.17555	1.35648	2.91691	4.45649	3.02158	0.985618
TTL	6.73306	6.8976	7.3989	5.45749	5.45798	5.81293	13.7294	13.553	14.3326	0.984686
SLC16A1	23.1519	22.7232	23.7947	16.9126	16.3288	16.7375	45.8332	46.2816	45.7086	0.984215
P4HA2	35.2424	35.7921	36.1078	24.6249	21.1889	22.6325	70.9601	71.9047	69.0397	0.983887
ATP13A3	50.7378	48.8131	49.9361	35.2555	45.7036	45.4191	104.605	94.9765	95.1823	0.979539
C20orf24	28.6736	27.6738	31.6605	23.6069	22.7119	22.6799	58.7854	54.7999	59.9234	0.979303
GLRX3	50.5823	51.4737	53.1879	31.572	35.9804	36.4437	98.5996	102.901	104.406	0.978554
ATG4A	5.48725	6.20353	5.61834	5.84536	4.61075	5.69647	10.8985	12.1021	11.0974	0.978154
C21orf59	27.2095	30.3065	26.1326	22.0421	24.6488	22.1666	60.5039	53.0685	50.9356	0.975744
UBA6	8.56242	9.69023	8.55169	5.17903	6.34495	6.54632	18.3304	16.9492	17.4072	0.974973
HS3ST3A1	2.78188	3.2583	3.52407	2.22282	1.72086	1.70701	7.48816	5.21984	6.08382	0.974381
RP11-204M4.2	0	0.631954	1.16015	0	0	0.813506	0	2.51844	1.00142	0.973864
OTUD3	2.66055	2.66405	2.32629	2.63423	2.75006	1.94589	4.64006	5.6236	4.75914	0.973455
FADS3	28.2004	30.0067	26.7217	12.299	13.4991	12.4749	53.9579	59.2258	53.4087	0.971997
SRPX	51.0035	50.987	52.2099	45.6417	46.1991	46.0364	100.875	98.949	102.493	0.971256
MRPS12	20.7423	18.244	17.9598	13.5381	12.1186	13.1721	37.8101	36.0365	37.7926	0.971177
PLEKHB2	83.8448	91.7466	89.7984	44.2915	48.7868	51.745	177.776	170.964	170.394	0.967991
C12orf49	4.49059	4.8987	5.8978	3.79761	4.8687	4.09158	10.044	9.65081	10.1577	0.965535
RPS6KA1	5.22392	6.70011	4.31585	2.82123	4.00426	2.72367	9.90783	9.63648	12.1074	0.962743
KIF3A	4.7772	4.17779	4.61291	4.19816	4.37519	4.50116	9.47376	8.75548	8.20342	0.962123
LSG1	12.7749	14.0985	14.6305	13.152	12.3955	12.3867	27.8377	25.6357	27.3529	0.961577
BCAP31	78.3909	80.3767	82.2956	73.9129	67.7956	70.659	159.947	149.764	159.385	0.960473
MRPL17	26.2444	29.8553	25.9464	15.8198	17.6684	18.778	54.5523	51.1568	53.9364	0.960365
PUS1	9.56103	9.20587	6.97137	7.21159	5.46429	5.77716	16.8346	18.0159	15.1351	0.957598
CYB5D1	12.6627	10.5469	10.9656	12.8343	12.2616	12.2587	23.115	20.9281	22.284	0.956649
FKBP4	446.675	452.929	481.47	222.588	242.013	231.482	866.928	909.836	899.27	0.954305
TOMM34	39.2359	40.5809	43.8697	17.0874	17.7342	17.9908	77.8229	77.0807	84.319	0.951666
MFSD2A	3.32086	2.75578	3.20954	1.778	1.46826	1.37322	5.51207	6.22496	6.19821	0.94964
NCDN	17.8773	20.674	19.2477	18.1231	18.2774	18.1333	39.7065	35.3098	36.5844	0.949228
NDUFV2P1	2.99146	2.32228	2.71299	1.4075	1.96139	2.58178	4.70436	5.40856	5.35269	0.94618
SERTAD1	10.1511	12.6809	9.64451	11.7153	8.41524	9.73609	20.6226	21.5034	20.334	0.943534
DTX2	12.8559	16.9154	14.0776	8.57085	8.73077	12.194	26.8768	29.6607	27.6983	0.941892
KRTAP2-3	23.3974	21.446	21.0246	0.291795	2.03312	1.54938	43.4636	42.2346	40.6886	0.940196
RP11-203J24.8	0.513874	0.797842	0.244115	0.531919	0	0.256763	0.772981	1.36266	0.842863	0.9369
TMEM33	8.83518	8.52226	8.56654	7.16619	8.34831	7.59375	16.6126	16.1727	16.7626	0.934536
ZNF271P	8.11127	9.37979	8.68982	8.67015	7.86955	8.58682	16.944	16.1689	16.9165	0.934264
TMEM2	24.1441	23.8362	23.2806	10.5291	12.9999	11.6199	46.8979	43.3845	45.8193	0.933501
CIPC	4.28878	3.41475	3.97027	3.24416	3.61313	4.17597	7.36107	7.7519	7.14723	0.931192
TXNDC17	25.7887	25.0247	24.713	15.6483	17.3703	16.2181	48.1554	48.0953	47.3127	0.926637
SLC18A2	1.72892	1.78955	1.82516	1.5245	1.33419	1.95172	3.85287	3.31113	2.99334	0.926629
PSME3	356.624	395.698	396.549	280.476	287.734	295.062	737.493	706.166	740.141	0.926623
FAM214B	26.0983	30.2222	27.7641	12.2387	12.2481	12.2958	54.0063	54.5063	50.7294	0.921308
HMGXB3	14.9632	14.4474	14.3498	7.30872	7.98153	9.11204	26.7635	27.6716	28.3585	0.919893
CYBA	86.0369	78.563	82.7725	90.0191	81.5956	93.4011	155.023	156.338	156.601	0.919708
TRMT10C	14.645	14.8428	13.3344	15.0189	13.4747	13.3477	28.2506	26.9086	25.8002	0.91884
NDUFV2	18.6295	17.9374	20.7183	16.7424	13.1931	14.4316	37.3638	35.6142	35.2936	0.91842
DDRGK1	35.5019	36.7469	41.0452	33.6492	29.7068	34.9079	76.9943	68.0541	68.7542	0.916208
SLC29A1	4.20378	4.5864	4.69565	5.17463	4.91658	4.71185	8.11791	8.63665	8.66545	0.91452
NOLC1	25.6258	22.9857	24.7642	18.701	20.8624	20.5306	44.3029	46.5494	47.4335	0.914282
HIVEP2	4.07638	4.31885	4.31141	3.39685	3.82139	3.9199	8.29141	7.33096	8.3051	0.913085
RRN3	15.408	17.2039	16.5702	14.8632	16.3932	17.0684	31.0672	30.5131	30.8915	0.910879
TMEM63B	14.4591	14.7161	15.4327	14.4667	14.8934	14.1893	28.4591	28.4524	26.9167	0.910138
TDRKH	0.834438	0.60459	0.528531	0.806156	0.445793	0.667097	1.08782	1.32762	1.27741	0.908331
ELOVL4	5.0678	5.22453	6.04751	2.68582	3.83373	4.05148	11.6481	9.60401	9.34297	0.904905
NDST2	1.0527	1.02151	0.906397	0.953453	0.68542	1.31498	1.534	2.18083	1.86154	0.903723
KIF9	0.707722	1.04098	0.990912	0.848243	0.716393	1.19114	2.07311	1.51452	1.52739	0.900768
PNO1	13.6494	14.7423	16.2487	11.0572	10.6355	9.97399	27.9166	27.5154	27.7857	0.898542
AP1S1	100.005	106.004	101.295	59.8225	62.8107	62.4724	192.902	186.807	191.987	0.895582
ATP6V1F	79.3586	78.3336	84.8855	86.6786	79.459	81.5805	156.792	147.105	146.83	0.89381
PRR7	7.32776	9.25594	8.14209	7.19938	8.5595	7.32278	16.2536	14.2715	15.3803	0.892651
CIAPIN1	16.5043	16.6735	17.1306	11.1162	13.4071	13.2735	30.0974	31.6247	31.5668	0.890906
DHX34	6.79838	6.17543	5.52107	4.49673	5.1089	4.82047	11.4568	11.5446	11.2896	0.890703
QSOX2	7.21466	6.63636	7.44956	5.5235	5.06161	4.86999	12.6134	13.6928	13.1509	0.889391
USB1	56.3949	53.9862	59.8781	34.4177	36.9206	38.114	106.569	103.922	104.708	0.888532
POLRMT	88.8817	101.253	90.1925	79.4816	79.6559	84.0912	168.111	169.214	180.937	0.88657
C2orf82	0.345462	1.07273	0.656444	1.43037	1.10737	0	0.519651	2.74822	0.56663	0.88618
MIR31HG	4.46967	4.11237	5.81944	1.37085	0.265322	0.661724	9.71155	8.48689	8.41731	0.886063
SLC45A3	2.46861	2.50304	2.05823	0.93868	0.807454	0.80553	4.3196	4.4086	4.25563	0.885145
BIRC3	9.28927	8.89901	8.63792	4.91002	4.11801	3.75269	16.3515	15.0242	18.154	0.88465
KIAA1549L	11.2655	12.6789	11.5446	2.03686	1.41921	2.21224	21.3857	19.3501	24.7715	0.884284
KCTD5	19.7268	20.29	20.1115	14.0931	16.8039	14.6485	39.2408	35.3566	36.309	0.883226
TTLL12	11.4039	11.9924	11.3541	6.26046	6.94892	6.88139	20.0587	22.4466	21.5434	0.882142
MT-ND2	949.001	808.93	731.727	679.468	734.888	800.745	1023.36	2204.73	1340.2	0.875709
SSSCA1	22.6164	26.0613	25.5167	17.9237	16.9912	19.0696	48.3722	41.8559	45.7899	0.874416
ATP6V0C	31.5934	43.5113	32.3105	25.858	29.4394	27.3764	71.9958	59.0988	65.1622	0.869545
MAP3K10	4.30721	4.84836	4.67201	3.9383	3.56671	4.12494	7.93678	8.09029	9.18416	0.866518
NKRF	3.92308	5.06729	4.573	3.41247	4.33267	3.88747	8.97576	7.69295	8.02984	0.86471
AGPAT5	6.19159	5.9757	6.48677	2.21717	4.02303	3.17731	11.9817	11.0048	10.9789	0.864579
TEX10	15.7673	14.5138	15.9334	10.7976	13.0533	13.1906	28.7869	26.9517	28.0991	0.859254
CHCHD10	35.0077	45.3773	43.9407	37.8992	30.3704	32.7373	83.0955	64.7262	77.438	0.857465
SFTA1P	0.619748	0.962222	0.785094	0.855347	0.331097	0.619327	1.24298	2.00861	1.01652	0.850499
LRWD1	13.5301	12.7078	16.9812	10.6048	9.54859	10.3493	24.54	25.1	27.5804	0.837313
PIM2	4.39827	3.13754	3.27526	2.46093	1.80994	2.7322	5.63252	7.14492	6.53168	0.836773
MTND2P28	48.5523	43.4687	35.0179	29.3472	40.5175	39.3113	55.6191	113.085	58.0316	0.835741
BCL2L1	41.2375	38.1776	41.8159	36.3471	31.2062	35.5683	71.3853	69.8983	74.9356	0.834737
AC002456.2	0.778106	1.20809	0.739276	0	1.87064	1.16637	0.585222	1.71944	2.55252	0.833613
OSBPL6	2.13632	2.68507	2.41632	2.24643	1.41306	1.21992	4.43768	4.10633	4.3383	0.831788
MRPS2	22.4099	23.7018	20.4342	18.9934	17.4764	17.8106	42.9853	37.0244	38.4222	0.831636
SNPH	4.66654	4.75351	4.94975	4.3448	5.02571	4.51532	8.61654	7.68217	9.27402	0.831567
PCMT1	41.2372	39.4228	41.356	30.0378	23.9686	27.1548	72.6555	68.4563	73.5874	0.815246
ARHGAP18	9.50817	9.91313	10.4518	4.11993	4.87295	4.77848	16.7554	17.8104	17.9302	0.813364
PLEKHN1	9.01121	7.95556	7.55428	1.09737	0.849562	1.05942	11.6944	17.1796	14.2007	0.81282
RAP1GAP2	9.5046	8.80651	8.41128	2.85629	4.42258	4.25119	15.2194	15.6507	15.9667	0.809593
PRR5L	7.92027	6.58769	3.76251	0	1.36008	2.2614	10.6374	12.0014	9.27922	0.804855
CORO2B	21.01	22.319	23.2775	13.8785	10.5783	12.4317	39.0887	38.0582	38.9667	0.801804
SIPA1L3	7.59713	8.24714	7.65813	5.1467	5.66736	5.01502	13.8899	12.939	14.0438	0.79833
POP1	48.9103	50.08	56.6848	12.6569	16.8944	18.5396	93.8677	86.2784	90.2511	0.796542
EMC3-AS1	3.08876	3.0829	1.67693	0.456746	3.18244	1.98428	3.3187	4.87534	5.4281	0.795448
SMAP2	122.774	114.429	113.657	63.2552	62.6235	67.1747	200	203.785	203.958	0.792564
DESI1	18.855	19.5329	20.268	13.3223	12.5313	14.7908	31.4113	35.2378	34.8844	0.791608
FABP5P7	4.26325	5.20075	4.0505	0.630422	1.46418	2.43449	7.32901	7.80584	8.24132	0.79053
SPRYD3	18.3817	18.7433	20.182	9.23057	9.43829	9.92022	33.0916	32.5328	33.0821	0.784433
KLC2	117.373	123.658	112.564	71.2524	67.892	72.5366	204.432	201.449	198.849	0.774194
GAS2L1	16.6548	18.9191	17.5462	11.3476	8.7851	10.3232	30.4436	29.5173	29.5996	0.753603
RNF128	17.1986	17.3452	13.6867	3.65179	2.59155	2.79103	26.0916	25.5965	29.5354	0.75195
DUSP18	12.9929	11.5274	12.1486	8.96612	13.2217	12.9841	20.7852	23.3338	17.421	0.746968
LIPH	0.5514	0.523175	0.349256	0	0.0981941	0.153063	0.829428	0.622775	0.929535	0.742237
NT5E	658.561	690.633	718.812	139.457	191.171	204.988	1168.14	1134	1152.25	0.740188
RP1-86C11.7	1.52798	0.677813	0.82956	0.451896	0.699698	0.654404	2.29842	1.15766	1.61114	0.739328
SSFA2	140.565	132.885	131.88	85.5113	95.4675	101.485	228.406	222.6	225.511	0.739027
PGM2L1	2.31741	2.94588	2.46323	1.82908	2.55351	2.63427	4.00879	4.31442	4.51374	0.732412
VPS9D1-AS1	1.33672	3.1677	1.80475	1.74778	0.902064	1.26551	3.28065	3.48243	3.57724	0.712758
CDK5R1	0.570312	0.708373	0.677314	0.118068	0.365623	0.712405	0.557619	1.26026	1.37976	0.709103
SERPINI1	6.35721	6.90915	8.25462	4.38696	6.45297	4.23526	12.1127	8.80343	14.0767	0.701314
RGS20	4.98243	4.64144	4.95656	3.15511	2.34868	2.51881	7.7592	7.82363	7.54731	0.66574
RP11-307L3.2	2.2792	5.50462	3.12788	3.66991	1.21765	2.78379	5.33309	6.04382	4.98449	0.58442
HIST1H1PS1	0	0.929525	0	0	0	0	0.900561	0	0.490988	0.582125
PPP1R1C	0.144923	0.675025	0.963839	0.600049	0	0.144825	0.653991	1.1529	0.831968	0.564967
DCBLD2	161.666	167.305	163.877	56.3441	76.8122	76.1783	250.697	236.117	240.716	0.561864
RFX8	1.29344	1.40574	0.983117	0.133886	0.207304	0.452398	1.45922	2.11509	1.5381	0.473394
FAM207BP	1.22109	2.27504	0.928121	1.01117	1.17425	0.976207	2.20414	1.9428	1.80256	0.427338
EDN1	11.4655	12.8094	11.7579	3.39088	3.69467	4.54671	14.1441	15.1749	18.0098	0.393407
RAPGEF4	7.44038	8.75147	8.56858	4.20089	6.5045	6.08345	7.12217	9.36672	9.6151	0.0762342
EMP2	6.81079	6.6689	6.13271	5.20763	4.8684	5.05127	5.71146	7.23674	6.14996	-0.0383315
B. Senescence-repressed genes.
Gene	P_Ren_1	P_Ren_2	P_Ren_3	Q_Ren_1	Q_Ren_2	Q_Ren_3	S_Ren_1	S_Ren_2	S_Ren_3	log2_SP
ELN	15.6609	15.6418	14.7887	2.57001	1.2244	0.763429	0.0718217	0	0.0391574	-8.69807
TOX	3.64228	2.87386	2.75139	7.91118	8.32575	6.47408	0	0.0263889	0	-8.45611
KIT	6.85956	5.95968	6.58478	7.06364	7.46227	7.06801	0	0.0314157	0.029148	-8.32369
TMEM155	4.36996	3.3924	4.44021	1.2565	0.875483	1.69827	0	0	0.0497753	-7.93754
LMOD1	29.9782	28.7947	30.194	31.5132	29.3759	32.2861	0.186917	0.164755	0.127385	-7.53693
CSDC2	7.63872	8.27435	7.76387	10.2055	9.96509	11.0953	0.133609	0	0	-7.46933
MGARP	10.408	7.4362	8.75096	5.72041	5.90484	4.97034	0	0.0814135	0.0755366	-7.40471
CHRM2	72.9393	65.456	69.0618	55.8703	55.111	55.2712	0.344824	0.497354	0.563997	-7.20489
TMEM130	2.26882	1.72806	1.22015	5.40596	3.43049	3.46509	0	0.0378385	0	-7.10723
CORIN	13.6242	10.6554	11.3746	11.9978	7.53668	7.69653	0.114705	0.134805	0.0416915	-6.93591
ROR2	3.09046	2.36714	2.66219	17.2318	12.2178	14.8241	0	0.0364225	0.0337934	-6.8535
PTN	58.3792	62.4037	62.3628	100.452	72.624	74.2989	0.689649	0.405251	0.563997	-6.78662
PODN	1.95107	2.85447	1.71111	34.0998	26.6399	24.3718	0	0.0663296	0	-6.61833
COL15A1	85.3478	77.7029	89.1551	801.116	694.691	695.269	0	1.97487	0.732924	-6.54134
ELOVL2	4.50492	3.92833	3.48858	13.095	15.7756	15.479	0.0928274	0.0272736	0.0506097	-6.12591
ANO1	11.0971	10.0338	10.7146	4.63735	3.50762	3.80802	0.154919	0.204825	0.147809	-5.97139
NEURL1B	14.1563	14.2425	14.6335	14.0673	15.0654	15.5048	0.170354	0.400414	0.185755	-5.82989
CDCA7	5.77184	4.74876	5.24945	0.919156	1.10692	1.03527	0.0742062	0.0872101	0.121372	-5.80132
CDKN2C	5.35109	6.06624	6.29454	1.84633	2.38232	1.65516	0	0.187694	0.139316	-5.75924
KIF20A	93.6212	101.355	114.204	10.925	10.3375	12.5004	2.05802	1.90038	1.7632	-5.75589
PRRX2	23.4242	26.5826	30.21	21.6176	13.7204	14.7595	0.424521	0.665218	0.462899	-5.69111
RP11-25K19.1	2.49511	1.93696	3.04791	8.4861	5.99849	5.34304	0	0	0.146161	-5.6774
FAM111B	20.8415	20.0156	22.2511	7.11696	6.88727	7.72972	0.323198	0.569752	0.352416	-5.66318
RAMP1	13.6713	11.1717	12.4422	31.58	23.0647	26.8927	0	0.50881	0.236041	-5.64551
MYBL2	9.62711	9.21494	9.4131	1.25774	1.12352	1.35435	0.140595	0.123925	0.306612	-5.62855
TMEM119	6.51502	6.01255	6.49291	20.4672	13.8738	14.3415	0.205595	0.0805413	0.112091	-5.57782
POLE2	8.48044	9.02863	9.8989	2.50807	3.49505	1.93707	0	0	0.596131	-5.52282
ADAMTS15	1.34787	1.14761	1.50781	12.2867	8.22296	8.19034	0.0327015	0.0384321	0.0178289	-5.49184
TK1	37.802	38.6963	40.8098	4.39127	3.39964	3.93661	0.797671	0.803533	1.05617	-5.46416
SLC7A14	3.99177	4.3971	3.57221	8.21334	9.0977	8.12451	0.0918121	0.0971111	0.0901011	-5.42181
KRT19	16.0595	17.0819	13.9093	2.75526	1.99087	2.03932	0.266929	0.470558	0.363826	-5.41692
APCDD1	0.874221	1.10596	1.23051	5.29545	4.411	5.37119	0	0.0572395	0.0265538	-5.25991
HTR2B	0.823663	0.511529	0.521707	1.36414	1.32011	1.64621	0	0.0485363	0	-5.25769
MKI67	14.81	16.8555	16.5546	2.16923	2.06027	2.34251	0.324981	0.391479	0.54926	-5.2516
KIF18B	3.62649	3.81421	4.0846	0.605457	0.187493	0.613746	0.0879846	0.0775523	0.143908	-5.21898
MEST	54.8245	56.6687	60.4343	51.5241	46.5236	47.4218	1.74656	1.47254	1.57325	-5.16492
LMNB1	19.3069	17.9084	19.3887	3.23284	3.58356	4.32691	0.747401	0.59604	0.261954	-5.1399
ASF1B	5.57051	6.41684	5.97543	1.24002	1.53601	1.85558	0.1802	0.105889	0.245613	-5.07825
TFAP2A	5.08577	7.89617	4.02664	1.75478	2.71704	2.75292	0.318755	0.187307	0	-5.0708
HOXA6	0.74821	1.35528	1.30326	1.03264	0.599589	1.12155	0	0	0.102268	-5.05797
RP11-632K20.7	1.76747	2.43926	1.49268	1.21969	2.83277	0.588755	0	0.173587	0	-5.03708
EFEMP1	23.9808	21.0225	23.9853	55.1338	52.8805	52.4937	0.79752	0.468639	0.836173	-5.0363
SPC25	15.4767	13.8918	17.2317	5.00629	0.775156	1.2083	0	0.641251	0.793282	-5.02168
HR	1.05111	1.17863	0.924679	0.725344	0.655139	0.661359	0.0292796	0.0688211	0	-5.00697
CCNE2	1.14812	1.38005	1.19638	0.536711	0.593588	0.44413	0.0557104	0	0.0607469	-4.9992
KIF2C	28.8574	31.3458	30.0236	2.953	3.16545	4.38598	0.495148	1.45479	0.899853	-4.98463
RP11-554A11.4	0.864462	1.04391	0.730064	2.58503	2.61706	2.39965	0	0.0849008	0	-4.95776
MCM10	3.17343	2.35826	2.83468	0.449212	0.347772	0.514994	0.0407995	0.0958985	0.133464	-4.9527
CDKN3	18.7948	18.6202	24.8296	2.59397	1.14755	2.3254	0.538507	0.791093	0.733988	-4.91472
PKN3	2.26562	1.7588	1.63177	0.605205	0.761375	1.09552	0	0.1292	0.0599369	-4.90233
CCNA2	21.8704	24.3717	22.2034	3.3775	2.54413	3.12852	0.596939	0.662572	1.04868	-4.89012
NUF2	27.4066	31.7448	30.5854	1.3509	3.83476	3.69521	0.327188	0.769049	1.96222	-4.87483
FBLN2	8.45429	7.58301	7.78817	8.15987	5.3559	5.76557	0.12889	0.378691	0.304508	-4.87472
GALNT15	5.83763	6.64385	6.02315	12.9055	13.251	12.38	0.158934	0.25683	0.216628	-4.87092
OXTR	11.926	9.91636	10.4717	1.75519	1.94766	1.69449	0.255063	0.42466	0.440359	-4.85049
C1R	12.333	14.1812	12.995	150.025	121.72	130.937	0.278971	0.573751	0.532334	-4.83417
NUSAP1	21.4903	17.5245	23.1442	3.16841	2.96395	3.75984	0.863309	0.901863	0.418381	-4.83121
LUZP2	3.83285	2.97544	3.41398	6.28177	3.96737	5.34638	0.120114	0.141162	0.0982294	-4.82956
DAAM2	6.49943	6.87575	6.17509	7.32127	6.8935	7.06811	0.143773	0.337936	0.209028	-4.82291
CDC25C	2.55005	2.96941	2.47786	0.239963	0.464438	0.347498	0.0871783	0.102455	0.0950597	-4.81204
C10orf10	19.8919	18.0893	17.4143	100.893	74.4658	67.0186	0.427455	1.00472	0.582624	-4.78106
TPD52L1	11.179	8.95823	9.07937	7.46553	7.22459	9.36959	0	0.637501	0.443612	-4.7562
DLGAP5	16.366	14.6496	16.6203	1.98794	2.00743	1.3351	0.43961	0.405937	0.924467	-4.75022
HUNK	0.968603	0.777856	1.11067	4.18332	3.15835	4.07205	0.0502412	0.0295227	0.0273916	-4.73679
HMMR	37.8554	34.0413	39.2212	2.48229	4.94162	4.62173	1.03064	1.66547	1.54525	-4.71142
UBE2C	35.2578	36.269	39.9775	3.30415	5.11603	6.08981	1.09127	1.66725	1.5469	-4.6948
SHF	1.6747	1.39294	1.59113	6.06728	3.1634	5.20001	0.179937	0	0	-4.69438
WDR76	3.1313	3.65828	4.21218	1.98968	1.49068	1.98284	0.139906	0.0822116	0.203406	-4.69235
BIRC5	15.24	17.5873	15.9922	1.78941	2.04154	1.86392	0.547445	0.32169	1.04464	-4.67296
SPC24	21.2369	31.1574	27.7667	4.03351	5.30853	4.28344	1.17229	0.861079	1.11849	-4.66862
EFNB3	0.727271	0.297148	0.581876	2.37729	1.53371	1.60656	0	0.0338338	0.0313915	-4.62216
LPPR3	1.91169	1.92525	2.30718	3.95764	4.05763	5.05996	0.0777191	0.0456693	0.127118	-4.61629
FLT3LG	0.597528	0.742179	1.24896	1.73183	0.957678	1.19425	0	0.105632	0	-4.61509
NDC80	8.97151	9.16858	10.3041	1.05796	1.72911	1.47532	0.341649	0.45171	0.372536	-4.60862
LBH	72.5767	74.7518	76.9849	75.2122	71.5717	72.1492	2.78305	3.12208	3.31053	-4.60529
HHIP-AS1	2.81832	2.80047	2.999	3.26736	3.25225	2.81641	0.169575	0.0996459	0.0924529	-4.57456
PURG	1.00752	0.78214	0.870221	1.0429	1.24779	1.87638	0	0	0.112674	-4.56114
STARD4-AS1	3.21439	2.14876	2.14203	0.739391	0.715528	0.780745	0.0671549	0.177577	0.0732261	-4.56098
GSTM5	1.03105	0.985117	0.753539	0.985161	1.27116	1.26813	0.119303	0	0	-4.53704
CRYAB	19.5242	19.7695	22.352	5.27212	1.74924	4.48388	0.912072	1.17909	0.596717	-4.51946
UBA7	4.59823	4.06297	4.08462	6.50105	7.42965	7.54644	0.112468	0.198265	0.245271	-4.51879
ASPM	8.58676	7.98502	8.64258	0.797365	1.05305	1.15469	0.340802	0.390511	0.371612	-4.51484
FAM83D	9.56741	10.6766	10.0842	2.26952	1.3577	1.64328	0.449735	0.352364	0.531259	-4.50752
PGM5	11.3966	11.6084	13.2417	12.3227	10.5871	9.06755	0.545955	0.577465	0.47625	-4.502
KIRREL3	7.09276	7.34149	7.60039	2.95014	2.07631	2.10373	0.341021	0.400782	0.239047	-4.4896
NRXN3	3.19517	2.28733	2.38132	0.99023	0.919941	0.745672	0.17268	0.0676467	0.109836	-4.48913
APOBEC3B	12.4099	13.8907	14.9897	2.3899	1.85022	1.73044	0.144708	0.765299	0.946741	-4.47495
TOP2A	35.898	36.3477	36.9963	6.3409	6.2135	7.23466	1.5465	1.83644	1.56335	-4.46504
SAMD11	50.4352	52.3058	46.2337	6.93364	4.10486	5.90636	1.1854	3.65697	1.93885	-4.45738
CENPM	6.89422	8.91998	6.42887	0.528615	1.8416	0.893088	0.38409	0.338549	0.31411	-4.42322
COL9A2	2.67172	1.87334	1.88332	3.56843	2.69354	3.18666	0.194461	0	0.10602	-4.41911
FBLN1	222.993	219.463	232.494	2872.81	2283.24	2201.07	10.4516	10.3639	10.8622	-4.41324
ITGA9-AS1	2.71801	1.31875	2.09818	2.46177	0.816796	2.54641	0	0.150155	0.139316	-4.40556
KIAA0101	8.93776	8.02933	7.90426	2.79294	1.98205	1.29201	0.169112	0.59624	0.4149	-4.39732
HOXA-AS3	1.31669	1.70358	1.04248	4.99739	1.05515	2.19299	0	0.193973	0	-4.38853
SGOL1	4.6722	5.25294	4.20943	0.66707	0.774649	0.563503	0.121173	0.356018	0.198191	-4.38738
NREP	53.1869	48.7302	50.9272	31.736	24.403	25.3478	1.978	2.72226	2.7244	-4.36359
MRVI1	15.985	16.1288	17.4826	25.5071	22.5543	24.1825	0.847932	0.818573	0.809016	-4.32443
OLFML2A	13.7547	17.5869	13.1781	111.748	96.3314	102.224	0.347733	1.12384	0.758339	-4.31938
CAND2	3.23013	3.11283	2.83083	5.01534	4.19519	3.97927	0.12566	0.196907	0.13702	-4.31911
FES	17.5459	19.3456	19.3279	17.8988	14.672	16.2634	1.14752	0.224768	1.4598	-4.31113
LPPR4	4.22661	4.24406	4.01569	3.5666	4.1602	3.1219	0.138212	0.284257	0.207223	-4.30956
MEGF6	2.41125	3.36083	2.21282	3.17662	2.94235	2.92987	0.12365	0.145318	0.134828	-4.30558
SNAP25	0.841022	1.58558	0.570752	1.98984	1.92562	1.74093	0	0.0530992	0.0985324	-4.30505
RP11-394O4.5	2.51595	2.10337	1.51698	1.10182	0.77546	1.25712	0.145559	0.171067	0	-4.27652
MAB21L2	5.65039	6.70049	6.59428	7.09225	7.13076	7.2027	0.334624	0.353937	0.2919	-4.27223
PRC1	29.5927	29.5996	29.6993	3.70274	2.99689	3.73719	1.22291	1.90431	1.50015	-4.26378
ARHGAP20	1.5344	1.63977	1.64716	4.20791	4.08807	4.12214	0.0599501	0.158525	0.0326849	-4.26275
PRSS12	32.1853	30.102	30.701	103.318	90.1801	82.8048	1.58165	1.49612	1.7667	-4.26264
ZNF730	2.39217	0.825354	1.26266	1.65078	1.70401	2.12493	0	0.234941	0	-4.25319
ADGRA2	307.785	319.249	323.207	760.15	648.382	693.071	19.4937	15.846	14.525	-4.2522
ZFHX4-AS1	18.4995	16.7547	17.5763	13.8299	7.41243	8.72993	2.31894	0.454219	0	-4.25177
IMPA2	9.09345	9.41233	9.71961	35.2978	23.0761	27.0725	0.85491	0.167454	0.466099	-4.2451
CXCL12	13.583	14.5834	14.199	29.4935	24.848	24.1468	0.682815	0.679014	0.887726	-4.23518
METTL7A	1.81545	1.69121	1.2649	3.94633	2.8127	2.78181	0.0455141	0.133725	0.0744432	-4.23336
BARD1	2.33248	2.50713	2.06692	1.0679	0.754857	0.784436	0.101209	0.118944	0.147145	-4.23294
MBOAT1	1.6499	1.49429	2.09008	1.56551	1.43235	2.26707	0.103409	0.12153	0.0563788	-4.21771
OLR1	7.46391	8.16638	8.66202	16.9039	15.4952	15.5685	0.753515	0.265668	0.287573	-4.21644
PLB1	1.03349	2.13947	2.45479	0.713187	3.58888	2.40984	0	0.304505	0	-4.20802
CDK1	41.6217	41.3157	40.355	7.06282	6.01469	10.5688	2.8225	1.357	2.5181	-4.20229
PTGER2	102.615	92.6142	96.7653	110.388	108.208	117.496	4.90476	4.0689	6.92117	-4.19931
MATN2	5.89929	5.49555	5.63787	11.279	9.01004	7.31709	0.365394	0.306732	0.256132	-4.19764
DCN	68.3174	63.2833	69.9679	367.497	257.246	252.624	3.99237	3.56469	3.51939	-4.1857
FAM46B	3.33324	2.66846	2.57311	0.970392	0.834733	0.988884	0.0783427	0.138107	0.256276	-4.18103
CHL1	1.322	0.906933	1.54812	0.636473	0.689843	0.906335	0.0462459	0.0407625	0.126067	-4.14782
LMO7	94.274	90.7801	87.675	20.8505	21.9597	22.0028	5.17813	5.04618	5.17108	-4.1469
PRUNE2	3.2636	3.60029	4.40631	1.12607	2.34004	2.40313	0.301441	0.101219	0.234781	-4.14408
KIAA1456	4.14027	3.1167	1.66882	1.03895	1.40758	1.1284	0.188724	0.110898	0.205785	-4.14246
CENPA	6.84032	7.13303	7.66295	1.05679	1.14541	1.32632	0.61429	0.360969	0.251184	-4.1409
RP11-119F19.4	1.00677	1.9539	0.956533	0	2.01699	2.01218	0	0.222475	0	-4.13811
C7orf31	0.918453	0.969674	0.80281	0.988732	1.47203	1.1014	0	0.0324732	0.120517	-4.1366
PLK4	4.46312	2.79172	5.2166	0.598253	0.87485	0.834262	0.241494	0.283813	0.184328	-4.13541
FAM65B	1.0595	1.32998	1.43497	3.17343	3.21553	3.24391	0.0678178	0.0398511	0.110923	-4.12894
FGL2	0.868316	1.30321	0.989981	30.0201	30.988	33.6389	0.087076	0.0255838	0.0712111	-4.10385
PDE7B	1.96779	1.84732	2.02176	2.70006	2.71376	2.85821	0.0688369	0.12135	0.15012	-4.10029
NPR3	49.555	40.8198	39.8154	24.7404	32.178	24.0441	3.35558	1.83096	2.48285	-4.08537
PRSS35	5.0545	5.33639	3.84181	4.39487	3.32141	4.19239	0.152062	0.357418	0.331618	-4.08079
RASSF4	2.06967	1.98085	2.07414	4.87164	4.31681	4.2782	0.170589	0.150362	0.0465028	-4.05899
SLC8A1	3.20856	3.5948	3.59002	1.05841	1.23381	1.12752	0.141433	0.21816	0.265064	-4.05646
GFRA1	5.91669	5.82287	6.75343	19.0601	21.331	20.4576	0.346225	0.466735	0.310903	-4.04044
MND1	3.43999	3.95624	3.26832	1.05505	1.021	0.636602	0	0.337849	0.313461	-4.03333
EXO1	23.0582	25.6185	21.3046	2.62766	4.40762	4.8622	1.27283	1.12191	1.90837	-4.02352
RP11-400K9.4	1.70502	1.60438	2.01265	0.855705	1.07651	1.13591	0.155438	0.0456693	0.127118	-4.01922
FANCD2	3.92274	3.15529	4.10866	0.635979	0.530237	1.06267	0.248823	0.208876	0.232558	-4.0185
MAMDC2	15.2116	16.4687	15.5866	4.80139	4.86509	4.43086	0.974777	1.02501	0.923046	-4.01539
GBP2	1.17075	1.14256	1.1441	8.24063	10.5078	9.69389	0.100632	0.0591335	0.0548649	-4.00976
FOXM1	18.6038	17.6271	20.3637	2.56273	2.21076	2.79221	0.851233	1.15672	1.50831	-4.00855
CD302	1.25275	0.97251	0.908336	4.70921	5.28374	3.7557	0	0.0874199	0.108146	-4.00209
IQGAP3	4.59295	4.44489	4.57899	0.68222	0.561172	0.740959	0.185887	0.309488	0.354712	-4.00164
ADAMTSL1	8.96944	8.98989	8.34673	1.27184	0.935399	0.844152	0.646878	0.529451	0.466041	-4.00154
CA11	1.33763	1.34993	0.953161	4.70765	3.323	5.41374	0	0.118235	0.1097	-3.99753
RP11-5C23.1	1.02455	0.397678	0.365032	0.795393	0.615778	1.53578	0	0.113201	0	-3.98079
KLHL13	2.27266	2.05832	2.77104	4.39127	3.94601	3.89876	0.227906	0.133922	0.0931912	-3.96423
SLC38A4	3.2207	2.52548	3.36906	4.57975	3.8584	5.65677	0.195743	0.258801	0.1334	-3.95453
NEIL3	2.25354	1.74942	1.99509	0.636182	0.410433	0.25591	0	0.135813	0.252019	-3.95099
LRRCC1	1.94067	2.46069	2.18186	2.07578	1.65887	1.77774	0.0973068	0.142949	0.185682	-3.95008
ASAP3	11.1152	10.2044	12.443	21.3101	16.8851	18.2551	0.290777	1.0252	0.871927	-3.9478
SMAD9	7.02584	7.85258	7.37102	5.638	4.98838	6.51793	0.344248	0.566404	0.544287	-3.93474
ATP10A	9.96978	9.31612	10.0687	1.94931	1.89379	1.9188	0.583207	0.718047	0.620791	-3.93287
CDCA3	7.23893	5.13394	8.15133	0.462538	0.572941	1.65221	0.537726	0.513465	0.29317	-3.93233
COL11A1	15.9113	14.7435	14.5384	5.29145	3.4183	3.51842	1.0694	1.03237	0.888441	-3.91779
CLEC3B	1.74195	1.08182	1.48952	3.24561	3.35025	2.26299	0	0	0.285716	-3.91613
BUB1B	61.1361	50.2518	54.8694	6.13121	8.47619	9.72439	3.50029	3.73971	3.81674	-3.91042
ADHFE1	7.74963	10.3132	5.46958	5.95902	4.96823	4.42535	0.999186	0.391428	0.181586	-3.90379
HLA-DMA	4.5052	4.08029	4.81542	7.38371	3.61031	5.06491	0.564735	0.33185	0	-3.90175
CDK15	21.7994	19.8545	18.3469	8.88382	6.32747	5.48904	1.42009	0.986196	1.61886	-3.89787
HMGB2	45.4408	43.6892	43.1731	13.381	14.5449	12.9836	2.84804	3.52026	2.51654	-3.89636
ESCO2	14.6653	8.50422	11.4154	3.2921	1.41594	3.0017	0.531563	0.937071	0.869428	-3.88676
CLSPN	4.44805	3.49317	4.49635	1.07075	0.663165	0.620236	0.272302	0.297162	0.275711	-3.87931
ID2	89.1286	83.8731	86.6328	19.6401	21.9843	22.4029	6.18082	5.02067	6.44226	-3.87925
TMEM200B	5.52297	4.97655	5.34106	5.10438	3.16137	3.99158	0.370883	0.305113	0.404412	-3.87398
CLDN11	219.879	212.935	202.747	254.497	205.046	207.456	15.3099	14.8265	13.3366	-3.86984
SLFN11	8.61551	8.38466	8.30489	7.90403	6.76327	6.70198	0.604531	0.51065	0.617985	-3.86794
SLC40A1	2.14985	2.5034	2.58725	15.8741	15.3905	13.2842	0.107795	0.0950139	0.293851	-3.86576
LZTS1	3.78246	3.85917	3.92227	5.10105	5.09231	4.64387	0.357636	0.210154	0.230436	-3.85669
CTD-3064M3.3	0.6911	0.877911	0.596919	1.5608	1.20834	1.00455	0.0945061	0.0555337	0	-3.85157
ITGBL1	24.4286	22.6493	23.7733	13.6158	15.4549	19.9645	1.48769	1.52985	1.94663	-3.83517
TCF19	9.89638	9.95242	11.2545	2.949	2.22298	3.18417	0.451102	0.629556	1.10674	-3.82978
DEPDC1B	1.97407	1.60909	2.11	0.204339	0.63278	0.443864	0.148472	0.130868	0.121421	-3.82842
RAD54L	12.5391	8.00065	11.587	2.1336	1.37649	2.40313	0.516756	0.759141	0.986079	-3.82812
DNAJC22	1.92878	1.86621	1.85908	1.96757	1.88167	1.50845	0.21024	0.123541	0.0687739	-3.81203
ZNF853	3.16558	3.57447	3.34179	10.1943	8.81471	9.80984	0.240492	0.169581	0.31468	-3.79812
KIF11	12.9674	12.7261	13.0918	2.25901	3.05038	2.61201	0.839782	0.919654	1.04057	-3.79201
PBX1	196.583	200.478	212.724	660.579	600.954	549.231	15.5634	13.5351	15.2733	-3.78058
COL3A1	137.258	122.323	131.465	539.339	409.451	402.268	9.70584	9.87269	8.95931	-3.77639
CEMIP	13.2103	11.9776	13.7996	52.6118	44.4787	40.2861	0.84722	0.995687	1.04979	-3.75252
NEDD9	9.86965	8.69606	9.81627	16.83	18.4766	17.7968	0.654376	0.769049	0.691236	-3.74648
GDF6	1.29961	0.931283	1.45638	1.51771	1.2818	0.899121	0.0501258	0.0883647	0.136643	-3.74435
FZD2	40.7012	43.7	43.1085	49.4443	47.3572	46.3924	3.51355	2.9421	3.06495	-3.74341
VASH2	2.1621	2.7974	3.1669	17.7177	15.8825	17.7352	0	0.318518	0.295525	-3.72621
F10	4.84814	5.67844	4.68701	7.57159	3.68065	6.62979	0.511767	0.150362	0.488279	-3.72514
VCAM1	2.53315	2.15928	2.54831	64.9871	72.8406	77.2336	0.298857	0.0878072	0.162938	-3.71968
RAD51AP1	16.9208	13.0002	13.0931	3.2502	2.51624	1.91755	1.04959	1.23352	1.00142	-3.71105
IFIT1	4.39527	3.25927	3.98895	13.1735	12.6169	19.798	0.0986785	0.579854	0.215199	-3.70354
TCEA3	12.8643	12.5918	16.2079	15.0529	8.51616	12.0172	0.84134	0.988777	1.3761	-3.69986
LIN7A	5.22618	4.76199	5.00372	2.92416	2.84596	3.2465	0.242821	0.517239	0.39716	-3.69545
DAB1	0.907864	1.15656	0.663507	2.74694	4.47712	3.65225	0.0700323	0.102881	0.0381818	-3.69184
FRZB	1.28712	1.33226	1.81581	17.6028	14.0028	13.9539	0.176011	0.103428	0.0639744	-3.69098
KIF15	2.80179	3.55915	2.54098	0.632766	0.734813	0.814514	0.306511	0.180112	0.208888	-3.67797
SMIM1	1.2559	0.389984	1.19323	2.08001	1.6103	1.25505	0	0.222022	0	-3.67667
CHAF1B	3.46865	2.99191	2.72014	0.740887	1.27953	0.88033	0.0828194	0.46233	0.180613	-3.66103
SEMA3D	3.62214	2.84243	2.9738	8.51749	7.82456	6.88526	0.236891	0.278404	0.242163	-3.6393
VANGL2	1.40882	1.39847	1.95292	2.72534	3.55352	3.48505	0.0347407	0.102072	0.24623	-3.63545
LSAMP	1.854	1.86495	1.55059	6.89253	6.42421	6.1323	0.117838	0.138487	0.171321	-3.62319
PLEKHA6	8.69858	8.58966	7.94784	7.00313	6.67696	6.69436	0.751988	0.648096	0.655977	-3.61753
KCNJ8	19.4603	20.3946	16.8714	11.5826	8.96704	6.80649	0.731817	1.50511	2.39393	-3.61467
IFITM1	14.3603	12.5906	14.7673	93.0348	77.1705	103.999	0.508262	1.79199	1.10842	-3.6134
ABAT	2.29522	2.93004	2.56836	3.64292	2.98377	2.72691	0.268529	0.180335	0.188232	-3.61271
FAM162B	4.28559	3.8814	2.82759	2.21804	1.33557	1.18963	0.179069	0.526123	0.195258	-3.61
MAP2K6	0.773497	0.667185	0.653242	1.77924	1.72182	1.11652	0.0646395	0.0379835	0.0704833	-3.59648
DES	0.54862	0.511073	0.521242	1.70365	1.31894	0.657897	0.0825247	0.0484932	0	-3.59294
CPXM1	3.55908	2.16228	2.30332	13.8819	12.1525	14.1751	0.232767	0.136779	0.296112	-3.59159
FZD7	88.8141	90.4566	90.303	84.7541	88.3063	82.5899	7.16295	7.25998	7.96777	-3.58971
ZNF367	2.19869	1.68059	1.70332	1.05042	0.975854	0.43944	0.203528	0.149496	0.110964	-3.58878
BST1	4.66654	5.69271	4.27531	7.07308	8.01343	7.66125	0.250697	0.441943	0.546722	-3.56171
GREM2	19.579	17.4033	19.6416	5.0207	5.59339	4.99487	1.60157	1.4901	1.72211	-3.55617
PEAR1	79.2323	75.4239	68.1252	42.6772	34.4764	37.977	7.55005	5.5457	5.88044	-3.55337
SAPCD2	1.44227	2.04022	1.94886	0.265406	0.462313	0.448401	0.192844	0.141648	0.131423	-3.54317
KAZALD1	7.09163	6.306	7.65651	14.4144	10.8493	12.8851	0.387905	0.854778	0.581588	-3.52871
CLEC14A	9.8468	9.37562	8.78686	2.81563	1.91823	2.60953	0.490998	1.00982	0.936927	-3.52228
RASSF2	2.77439	1.804	2.59088	24.7417	16.4942	16.3507	0.285354	0.167679	0.175022	-3.51286
ABCA8	0.934153	0.809507	0.660491	6.7462	8.98318	9.85622	0.0653569	0.038405	0.106898	-3.51254
TNFSF4	16.3289	14.9098	15.3432	7.14809	8.0703	6.36179	1.35255	1.36703	1.41583	-3.49367
ANKRD18B	3.23606	3.45104	2.82612	1.35341	2.04318	1.56793	0.344185	0.288928	0.214457	-3.48853
MAN1C1	6.11202	6.18882	6.03424	28.0022	30.1118	31.0439	0.599598	0.610715	0.457663	-3.45844
PDE5A	108.763	105.163	107.692	222.451	234.136	221.977	9.95778	9.91994	9.44421	-3.45529
ANKRD33B	2.09296	1.92565	1.10473	2.2467	2.8575	3.17605	0	0.342592	0.127145	-3.44717
MIR143HG	5.33318	5.86522	3.1669	4.14034	4.98614	2.66478	0	0.589257	0.728962	-3.44593
CSRP2	84.8792	74.3186	72.1939	44.4037	45.9052	38.2939	6.49206	6.58931	8.2588	-3.43869
NLGN1	9.11777	9.68587	11.0944	35.7648	26.1502	31.3311	0.481233	1.41391	0.918294	-3.40965
ENPP2	1.3733	1.48068	1.63096	1.57947	2.01761	1.75358	0.229527	0.0674374	0.125139	-3.40942
NYNRIN	5.54098	7.18942	6.57685	10.8212	8.90585	10.3685	0.519453	0.707604	0.617906	-3.38748
TMEM47	97.3801	96.3079	95.4976	49.3763	55.194	53.3844	8.74037	8.71241	10.2042	-3.38628
NRIP2	1.92036	2.98156	2.83816	1.76693	1.7099	2.13229	0	0.565809	0.174989	-3.38519
AC004381.6	7.44232	10.2344	7.87903	5.72271	2.72641	4.24987	0.319854	0.563858	1.56947	-3.38092
VWA1	7.5293	11.69	5.86592	14.3404	8.44721	8.72805	0.906059	0.399314	1.11147	-3.37564
TRAIP	1.82441	2.36048	2.36893	1.13308	1.26708	0.850812	0.274431	0.161261	0.199494	-3.36708
KCND1	2.12638	1.85343	2.19748	3.3981	3.70696	3.69067	0.224459	0.197845	0.183564	-3.3499
NACAD	3.53477	3.36496	3.99573	3.41852	2.85332	2.78464	0.155243	0.364896	0.550153	-3.34765
DTL	4.88141	4.6897	4.53532	1.39581	1.5993	0.943279	0.446243	0.476766	0.464468	-3.34582
RP11-867G23.10	0.792269	0.820052	0.752732	1.09345	0.84653	1.05564	0	0.233432	0	-3.3408
CDH18	1.50904	0.425989	1.56408	0.284006	0.219872	0.685462	0	0.12126	0.225013	-3.337
PCDHB9	0.990601	4.22953	1.41175	6.15231	7.93834	5.44461	0	0.656703	0	-3.33611
TSPAN18	2.37826	1.84625	1.77538	5.97859	5.44531	5.09282	0	0.600621	0	-3.32041
PRRT2	20.0931	15.0604	14.9212	26.7752	14.8063	27.0034	1.04222	2.85801	1.13644	-3.31354
GAS1	1.57053	1.2192	1.82374	13.0957	9.57908	11.8581	0.131245	0.154245	0.178888	-3.31248
GRIA4	8.06517	9.91325	8.9398	45.916	52.7824	49.0298	1.01098	0.891111	0.826786	-3.3022
RP11-253E3.3	1.47406	2.17965	1.80064	1.81646	1.51877	1.89394	0.105587	0.248179	0.201481	-3.29621
SECTM1	1.48989	1.54214	1.83496	10.3956	5.83708	7.88555	0.166009	0.243876	0.0905087	-3.28189
ZFPM2	69.8869	67.2847	75.8385	75.1779	75.7715	76.5153	6.69917	6.9647	8.28815	-3.2785
CNN1	61.6272	66.9543	64.6509	36.2734	42.2443	42.8682	6.58904	6.27507	7.06085	-3.27769
KCNK2	24.4879	17.6274	21.9263	7.37389	5.70873	5.11672	2.79055	1.70537	2.12998	-3.27282
SMO	9.86507	10.8599	9.99971	18.3738	18.2964	17.7055	0.992592	1.39984	0.811746	-3.26137
HSPA2	2.39808	2.80131	2.30011	5.91021	4.42915	4.83855	0.412257	0.201875	0.168573	-3.26026
MN1	1.32209	1.01367	1.20959	12.1984	9.60071	9.80293	0.147312	0.129846	0.093701	-3.25699
IFI35	2.78262	3.08593	3.39912	5.76067	4.77836	5.85941	0.298977	0.263528	0.407508	-3.25613
B3GALNT1	4.97845	3.86478	4.19251	4.06015	4.83583	5.08814	0.397128	0.566732	0.4021	-3.25449
GBP1	25.885	23.0283	24.7863	20.8631	22.5996	22.7	1.71151	2.51429	3.4992	-3.25405
SYT15	6.71517	6.35731	6.22445	3.72979	4.20005	3.1098	0.246369	0.579084	1.20889	-3.24574
TBX4	5.91308	4.91821	5.41735	8.74387	7.1078	7.38633	0.635327	0.933327	0.173191	-3.22163
CTD-2291D10.4	1.69817	0.329573	1.21007	0	0.680429	0.84851	0	0	0.34817	-3.21716
APOE	1.12304	1.74363	1.26099	11.4134	8.50874	8.05997	0	0.360969	0.0837281	-3.21443
SYNGR3	3.01154	3.11715	2.58876	8.31278	10.8026	13.0412	0.215716	0.253518	0.470435	-3.21368
FST	161.568	168.526	166.855	45.1043	41.275	44.5721	17.086	17.5268	19.0723	-3.2105
HAUS4	4.09111	3.0436	4.0489	4.58766	3.82489	3.91798	0.128207	0.452022	0.629089	-3.20912
OLFML3	46.1052	43.0686	46.8944	66.8006	47.0143	50.7259	5.3717	4.39658	4.96827	-3.20686
LDB3	1.38573	0.910244	1.2153	0.551688	0.256264	0.532611	0.240513	0.14133	0	-3.20094
MATN3	4.05562	3.6415	3.57468	4.04629	7.98803	6.83616	0.441004	0.345523	0.4408	-3.19913
LIMS2	29.4976	31.121	28.9404	23.0133	18.3776	18.7187	3.42328	3.32686	3.01492	-3.19714
ANO4	35.7968	31.7985	37.2254	44.4277	47.9533	51.5231	3.61655	4.32902	3.50533	-3.19439
ARHGAP28	2.68693	2.83677	2.91024	46.3917	48.318	47.043	0.242504	0.285	0.396641	-3.19001
TYMS	34.283	32.3745	38.1419	11.9826	15.3422	14.1637	3.79514	3.67311	4.01653	-3.18984
ECHDC3	1.94456	1.39344	1.77646	1.85801	0.719217	1.94324	0.112502	0.264433	0.184009	-3.18865
PENK	2.78188	1.07979	1.32153	3.35949	11.8896	7.4133	0	0	0.570358	-3.1839
RELN	8.78263	9.41607	9.11397	5.27368	6.78186	6.45468	1.0742	0.838486	1.10138	-3.17979
SCARA3	132.111	148.975	147.175	106.807	111.148	113.115	14.2779	15.9809	17.1044	-3.17665
PKDCC	8.23185	7.19397	7.30589	27.8588	21.0937	22.2158	1.03806	0.871404	0.606376	-3.1756
RP11-141O15.1	1.1061	1.43111	1.4012	1.14494	0.886389	0.736898	0.277303	0.162949	0	-3.16121
SEMA3B	16.5056	17.8361	15.5565	37.4507	32.3798	41.9617	1.589	1.98417	2.05752	-3.1476
SLC15A3	4.86828	2.93942	4.11141	25.1962	20.3733	28.1088	0.406832	0.717188	0.221806	-3.14671
SOD3	27.2577	29.1386	31.8411	125.81	69.4691	96.9	2.01647	3.94973	4.03108	-3.14178
GUCY1B3	1.86379	1.24017	1.41663	16.0954	17.5816	17.9867	0.160203	0.0470694	0.305701	-3.13955
AMOT	4.20768	4.83709	4.89932	4.96705	4.44803	4.49111	0.457863	0.553926	0.572677	-3.13759
C22orf15	1.8877	0.6513	0.597833	2.1711	1.34466	0.838409	0	0.185396	0.172013	-3.13366
GPC6	14.4555	14.0643	14.4952	27.6364	25.9498	25.4611	1.72119	1.34854	1.84551	-3.12951
RP11-305K5.1	1.45665	1.50773	0.23066	2.0104	2.33462	1.21305	0.365188	0	0	-3.12913
PRIM1	3.71934	3.14981	4.57779	1.22498	1.08384	1.18262	0.381458	0.448304	0.485267	-3.1218
PAXIP1-AS2	1.85385	1.96936	1.66864	3.43391	2.3457	2.24261	0.146769	0.0862442	0.400093	-3.11677
KCNH2	0.981505	0.820554	0.789059	7.11179	5.68732	5.50779	0.170354	0.0667356	0.0619183	-3.11532
GINS2	4.79847	4.51305	5.21656	1.14622	0.665538	1.47545	0.971649	0.367046	0.340551	-3.11296
ARPIN	1.49471	1.38737	1.58992	1.58083	1.61444	1.7697	0.146633	0.201051	0.173214	-3.10185
DBP	1.16192	0.429525	0.73596	0.801816	1.50754	1.10584	0.0832281	0.097813	0.0907524	-3.09814
OAS3	1.50514	1.65292	1.30795	1.51999	1.8828	2.9899	0.0552212	0.210919	0.255907	-3.09674
BCAM	11.5249	11.1211	10.7752	17.2052	20.8262	19.9139	1.58855	0.974052	1.35561	-3.09249
MDK	109.051	119.061	116.974	181.309	145.96	161.192	11.4555	14.1174	14.92	-3.09121
DIAPH3	12.2714	12.3961	12.1712	4.09236	5.01979	4.07913	1.69914	1.47498	1.15797	-3.08808
HDAC5	20.3311	21.0321	21.6926	12.7996	10.0577	10.3669	2.29892	2.31289	2.8106	-3.08667
ETNK2	8.26934	6.61641	7.95307	7.24687	6.09825	8.16233	0.763124	0.762326	1.16496	-3.08559
GPRC5A	13.0835	12.5106	14.6111	26.7737	33.1052	33.4482	1.68834	1.55478	1.49751	-3.08423
GLI1	2.83155	3.41932	2.83971	1.62832	3.02548	1.25761	0	0.556187	0.516038	-3.08377
KDELC2	32.7202	30.996	32.446	24.3952	26.2208	26.9244	3.87208	3.74162	3.72955	-3.08364
ZNF519	1.59754	0.992136	0.910689	0.330727	1.53625	1.7561	0	0.282416	0.131015	-3.08179
CDH6	144.453	134.611	146.184	74.1415	69.5558	71.6737	17.0423	15.7854	17.52	-3.07831
PABPC5	0.781806	0.758646	1.20704	1.4162	0.939769	1.66021	0	0.0863808	0.240436	-3.07156
PLEKHA4	15.0978	16.0423	14.8374	33.5023	26.9955	29.0906	1.4194	1.50132	2.55374	-3.07014
SPEG	7.98407	7.65431	6.39019	5.73063	4.43655	5.3953	0.860302	0.899845	0.863031	-3.06999
ARHGAP33	16.7029	18.0928	10.7026	8.04161	4.66924	7.18127	1.7529	2.23175	1.43353	-3.06993
PIANP	7.70812	8.97573	6.84165	13.4379	11.1349	11.5036	0.686529	1.12061	0.998127	-3.06802
ZNF362	24.077	26.3557	29.4584	46.6176	46.9176	47.7752	3.38722	3.06215	3.12522	-3.06075
EPHB3	1.25193	1.08488	0.995824	2.89316	1.49322	1.42565	0	0.283083	0.119386	-3.04972
SEMA4G	3.83882	2.36515	4.1104	3.91055	2.83215	2.86194	0.458289	0.59246	0.199888	-3.04392
MYH10	26.9953	27.9502	26.9162	45.5907	44.0556	39.4889	3.08316	3.35661	3.4922	-3.04304
PDGFRB	64.9763	65.8147	64.6237	86.3724	70.3253	71.0977	7.65815	7.55099	8.66894	-3.03278
ITGB3BP	11.5164	12.3537	10.9417	7.80268	6.04069	7.11438	1.25987	1.29557	1.71721	-3.02637
LMCD1	2.64121	3.23504	2.56517	4.07056	2.86914	2.90336	0.397297	0.285339	0.361012	-3.01585
GPC4	1.21838	1.35118	1.20483	5.66236	5.73865	4.87021	0.112207	0.109892	0.244702	-3.01537
PXMP2	7.47454	7.20309	7.83617	4.80228	7.22912	5.15135	1.16311	0.569554	1.05688	-3.01271
RP11-731J8.2	1.05711	0.902702	1.05458	1.34955	0.847134	0.897936	0.0530044	0.109013	0.216736	-2.99254
FAT4	5.94352	6.37759	6.50449	10.895	13.5839	10.6559	0.920501	0.588234	0.859434	-2.99085
GALNT5	58.777	59.2971	62.7745	51.0146	59.4499	60.5745	8.0868	7.18978	7.88365	-2.96506
HELLS	33.1308	30.7018	36.092	15.0823	12.7884	13.5207	4.43567	4.13972	4.26766	-2.95985
EEPD1	1.99295	2.41111	2.16399	3.48287	2.48896	2.40543	0.428262	0.2059	0.212263	-2.95601
LCTL	3.0176	2.2513	2.71808	0.567921	0.816537	0.665772	0.29475	0.381042	0.353536	-2.95595
IL15	3.23879	3.0436	2.83423	2.11738	2.45886	2.04417	0.384621	0.376685	0.419393	-2.94886
SLC2A12	1.95981	1.84282	2.07181	2.40006	2.07928	2.23432	0.290646	0.243985	0.226373	-2.94847
SMC4	180.292	172.28	183.211	56.2572	48.8578	49.0896	23.3205	21.5562	24.8573	-2.94171
RP11-38L15.3	2.21219	0.572443	1.7515	1.14494	2.95463	1.4738	0.277303	0.162949	0.151186	-2.93917
COL14A1	1.25459	0.885399	1.0475	91.5346	100.173	103.984	0.228749	0	0.187072	-2.93838
CDKN1C	4.95341	4.23772	3.26554	14.4403	11.1794	9.79908	0.608248	0.357418	0.663236	-2.93495
ZNF711	1.25603	1.67152	1.10811	1.36204	1.53377	1.58391	0.0449844	0.237903	0.245256	-2.9338
PDE1C	12.3354	10.7941	11.8574	8.09591	9.28548	8.73265	1.48877	1.79234	1.30661	-2.93097
SRRM3	1.94624	1.74942	2.14108	1.41374	1.36811	1.09188	0.205444	0.392349	0.168012	-2.93011
NXNL2	2.59852	2.17241	1.80416	0.620716	0.480546	0.998753	0	0.618386	0.245892	-2.92744
GRIN3B	1.01491	0.933775	0.714266	0.855999	0.903679	1.01422	0.0565424	0.232578	0.0616541	-2.92441
CPS1	9.8805	9.31387	11.2314	10.2275	9.61459	10.0501	0.796204	0.62382	2.60455	-2.91838
ITGA7	7.33397	7.10455	6.58087	2.46562	2.51162	2.7562	1.08433	0.803397	0.899625	-2.91475
INPP5J	1.64127	2.54824	2.89597	1.9416	3.75788	2.8117	0.352691	0.207248	0.384576	-2.90722
ATOH8	13.9422	16.9937	14.6701	7.55308	8.04024	8.46381	2.45002	1.61244	2.03035	-2.90404
COL9A3	2.13642	3.31701	5.35131	12.4645	7.47079	8.53989	0.29215	0.51502	0.637124	-2.90323
CSRNP3	1.169	0.567187	1.31892	1.21005	1.5223	0.94917	0.219805	0.129162	0.0599191	-2.90145
EHHADH	1.88999	1.5418	2.37394	1.85688	0.872805	1.56859	0.0963717	0.39641	0.288981	-2.89268
GAS6	370.176	400.477	394.393	342.068	304.565	296.331	53.2849	52.4052	52.827	-2.87768
PRKD1	12.1476	12.0768	12.6735	11.9917	14.4827	13.9586	1.84221	1.81395	1.38441	-2.87188
MFAP4	26.7565	26.8443	31.0427	296.287	215.682	208.126	4.84555	3.02167	3.7201	-2.86885
RP11-848P1.9	1.3351	0.77733	0.951356	0.690991	0	1.33419	0	0.147514	0.273731	-2.86259
CCDC146	4.42836	3.09397	4.41774	5.50063	6.03285	8.40817	0.666124	0.978569	0	-2.85992
EXTL1	25.7278	24.4108	24.0559	8.03162	7.85423	4.4891	2.45716	3.24872	4.52132	-2.8589
ANKRD53	0.73377	1.40216	1.01892	1.51907	0.814179	0.50765	0.339616	0.0498914	0.0462899	-2.85584
GCA	1.3636	1.88189	1.00765	2.5093	3.39964	2.42253	0.455812	0.133922	0	-2.85039
RTKN2	2.12192	1.04459	1.42597	6.21428	7.38236	6.15455	0.233549	0.320222	0.0848875	-2.84616
RP11-54F2.1	1.69579	1.91482	1.9041	1.27661	3.45913	2.31086	0.231894	0.408797	0.126429	-2.84576
CDH4	2.29125	3.087	2.87856	3.72417	2.64038	2.83846	0.37029	0.468656	0.31059	-2.84453
MXD3	2.27286	2.94071	2.57076	1.12032	1.21426	1.35198	0.162804	0.526169	0.399426	-2.83837
LOXL3	4.04289	3.91469	3.75853	9.08968	11.8446	12.3376	0.45774	0.57638	0.606077	-2.83655
PER3	6.15031	6.40787	5.15141	3.35067	3.24253	3.72003	1.09556	0.858367	0.530937	-2.83329
ACTA2-AS1	5.98846	5.27707	5.53584	3.0156	1.55641	2.10262	0.973835	0.858367	0.530937	-2.8298
SMAD6	4.75954	6.04155	5.8664	3.92802	3.24716	3.47082	0.773989	0.625366	0.949457	-2.82703
HAUS5	3.66681	3.67968	4.54596	2.86982	1.93508	2.32371	0.605381	0.671942	0.403401	-2.82289
ACTA2	319.067	310.005	341.624	167.123	162.938	170.023	45.1068	46.3041	46.1106	-2.81936
MFI2-AS1	1.38573	1.61361	3.29144	2.86878	1.66571	1.03859	0	0.612431	0.284111	-2.8108
C5	0.767286	0.700758	1.00773	0.794228	1.22975	1.01484	0.101838	0.159579	0.0925375	-2.80624
GDF5	3.72629	2.73202	3.24531	10.5	8.37773	7.70612	0.389248	0.503206	0.509325	-2.79126
VAMP5	26.6708	31.96	29.7615	44.4681	34.4264	42.0361	4.57731	3.79725	4.40393	-2.7902
SV2A	9.32794	10.1465	9.95035	6.82244	6.62463	7.95406	1.2603	1.57989	1.42004	-2.78803
SLIT2	13.5514	13.246	13.323	11.417	14.127	12.9534	1.94981	1.7707	2.12608	-2.77867
THBS4	0.645706	0.334175	1.43146	3.1191	4.13957	3.65652	0	0	0.353031	-2.77197
RPS6KA2	10.9057	11.3758	11.0254	50.5031	54.4053	55.9094	1.33785	1.94665	1.59773	-2.77021
EDIL3	66.4265	60.7218	66.7307	36.8911	43.656	49.2515	9.88997	8.4867	10.078	-2.76842
HOXA-AS2	10.6611	11.2858	10.5895	14.5468	9.32014	13.8016	1.45788	1.92753	1.39097	-2.76806
RNF150	3.57223	3.26135	3.2386	5.88501	5.26165	5.3547	0.435172	0.489195	0.557037	-2.76534
AP000662.4	5.65534	6.0788	3.30653	6.30422	5.22922	6.52096	1.30875	0.192262	0.713534	-2.76378
FAM109B	5.28179	4.18227	5.41967	7.76351	5.41779	6.12272	0.635599	0.700295	0.866326	-2.75671
NLRP1	41.4058	47.8615	46.3953	30.8454	31.8899	31.3425	6.14755	7.32806	6.62671	-2.75459
PDGFD	1.13563	1.20904	1.35641	51.3866	41.3427	40.3039	0.195228	0.1434	0.212878	-2.7465
DOK5	4.08377	4.19446	4.59628	5.853	3.12155	3.13923	0.661543	0.777472	0.51525	-2.71982
GSDMD	5.23757	6.52083	4.78841	11.7636	9.50311	9.13483	1.11488	0.829824	0.567311	-2.71964
PNMAL2	0.339752	3.69249	1.29119	9.84709	4.35625	4.41377	0.511062	0.30031	0	-2.71392
LAYN	197.328	172.682	194.937	163.405	170.351	174.113	27.6587	28.3433	30.1592	-2.71301
C21orf58	7.2183	6.24398	4.40877	2.13479	1.65271	4.22499	0.620453	1.09377	1.01482	-2.71116
ZNF608	24.5217	22.3956	23.1457	41.807	48.6777	43.8048	3.3752	4.25001	3.08885	-2.70915
POU6F1	1.05226	0.928263	0.931586	2.02989	1.45652	1.24274	0.179868	0.147971	0.117677	-2.70852
C10orf54	3.28774	3.51194	3.22363	5.3362	4.25765	4.96769	0.59346	0.534718	0.409837	-2.70422
MAP6	2.84835	3.27369	2.91708	1.83794	2.07506	2.32889	0.278218	0.686642	0.424718	-2.70154
HOXA2	1.49573	2.95562	2.00244	3.65951	3.48692	2.85355	0.409075	0.360571	0.223029	-2.70076
PLXDC2	18.0056	17.5062	17.7299	26.3283	30.3992	27.1648	2.6953	2.7427	2.75976	-2.69926
C7orf69	1.90618	2.07168	1.08663	1.18387	0.916529	0.952443	0.286732	0.336979	0.156327	-2.6988
GLIS1	2.06135	2.17903	1.95848	1.81594	1.54645	2.05995	0.197918	0.542737	0.215811	-2.69621
GPRC5B	2.46045	2.2039	2.04545	7.64053	7.84895	7.61275	0.391458	0.25094	0.407446	-2.6761
SGK3	4.17814	3.64893	3.47344	2.54858	3.4678	3.50428	0.561148	0.659484	0.550691	-2.67349
PCDH7	21.5919	21.6214	21.4843	16.4286	19.8807	19.8641	3.27397	3.45612	3.52257	-2.65771
RAVER2	5.372	5.66282	4.88902	3.98025	2.80954	3.33403	0.978188	0.599794	0.950684	-2.65474
CRISPLD2	8.68634	8.14196	8.81498	12.4153	9.61169	10.5617	1.82037	1.141	1.1248	-2.64976
CNTRL	6.94816	7.19182	8.31291	5.06114	4.43379	4.75754	0.870965	1.19419	1.53008	-2.64274
EYA2	3.56023	3.04727	4.07642	3.77973	3.87721	2.96484	0.549269	0.605177	0.561492	-2.63837
TMC3-AS1	1.92452	0.498003	0.914242	0.996051	2.31337	1.28214	0	0.141759	0.394578	-2.63724
GAL3ST4	4.70281	4.6763	5.17097	9.40772	8.6383	9.08241	0.715355	0.887421	0.736692	-2.63677
CDH24	12.1731	10.7864	11.6825	6.10938	6.60196	8.17135	1.57217	2.22807	1.81514	-2.62507
TUB	24.9605	25.5818	23.9147	17.9988	14.159	18.077	4.11319	4.27622	3.68004	-2.62505
DLX1	0.9654	1.68624	1.60514	0.49965	0.967048	0.602965	0.181522	0.213332	0.296899	-2.62144
FBXO5	6.75715	6.6762	7.27295	4.10861	4.16535	3.82488	1.3505	1.12772	0.891303	-2.61946
WISP1	1.12203	0.435517	1.33255	26.1322	31.4705	31.6758	0.140649	0.330592	0	-2.61658
HOXA5	16.4489	15.9472	15.5574	28.506	21.4723	22.2393	1.9033	2.82893	3.11305	-2.61174
HOXA3	5.17812	4.87068	4.23741	5.32082	4.72505	4.64581	1.02338	0.634766	0.681936	-2.60999
USP44	7.84994	7.99826	9.11881	8.69691	7.22444	6.58824	1.47601	1.40941	1.23223	-2.60013
COL1A1	1459.7	1439.52	1379.73	1592.2	1265.82	1144.87	236.534	235.3	233.952	-2.59995
C17orf107	1.54767	0.901093	1.19473	1.00126	1.55031	1.15996	0.436507	0.0855001	0.0793282	-2.59908
GPRASP1	1.79697	1.5393	1.53068	1.71041	2.4166	1.79575	0.279625	0.219084	0.304904	-2.59844
TMEM25	11.4138	12.3107	12.0918	9.93264	10.6036	9.69011	1.67131	2.00883	2.23659	-2.59774
SELENBP1	8.37686	8.96207	8.15947	13.2615	18.9541	17.6568	1.16477	1.49332	1.55872	-2.59618
CELSR2	1.22932	1.34514	1.23471	1.11494	1.65127	1.60288	0.140889	0.289762	0.201634	-2.59083
SPIN4	2.3965	2.60457	2.44767	1.55041	2.30457	1.19744	0.630852	0.238308	0.368509	-2.58937
SGOL2	55.6911	51.1616	57.4891	22.7395	24.3992	25.6121	11.015	9.87927	6.47951	-2.58584
GRIK2	1.31339	1.27948	1.884	0.746397	0.866769	0.694852	0.193689	0.341447	0.2112	-2.5846
DHX58	0.473132	1.22431	0.749203	3.91797	7.58304	4.2553	0	0.278805	0.12934	-2.58365
CORO6	2.69687	2.57672	2.11881	2.25473	1.41308	2.95418	0.390066	0.504264	0.340264	-2.58201
CCDC170	0.652416	0.832059	0.79696	2.3154	2.57677	2.09563	0.105148	0.123574	0.152871	-2.57984
BTN3A3	13.785	12.8416	13.621	50.2271	37.4119	38.9392	2.48829	2.43694	1.80883	-2.57935
DCHS1	2.31423	2.43688	2.39466	12.4044	13.6061	12.5021	0.310198	0.486076	0.40401	-2.57371
STX1B	3.72845	3.73604	2.21085	1.916	1.31381	1.92902	0.517089	0.631077	0.477092	-2.57365
PRR16	16.6605	16.8794	17.3717	15.0533	17.4244	17.7074	2.3362	3.61919	2.6053	-2.57219
VILL	1.03813	1.22497	0.986324	2.23513	1.33108	2.15784	0.187389	0.256932	0.102165	-2.57193
TMSB15B	3.47929	2.98832	2.532	2.91182	1.77969	2.51523	0.334062	0.392603	0.789235	-2.56969
GPR137C	1.45915	1.13274	1.32606	1.64172	1.52519	1.26796	0.286289	0.140191	0.234128	-2.56823
EPB41	16.444	18.1553	21.1784	13.6171	10.5421	11.6856	1.64903	3.7145	4.04574	-2.56753
INADL	1.57237	2.00814	1.42162	0.577531	0.934873	1.11512	0.305187	0.269001	0.270382	-2.56626
MEIS1	225.051	227.078	218.577	184.399	175.702	171.965	34.4869	44.0243	34.7951	-2.56545
SULF1	52.7901	43.4755	49.5742	396.603	313.909	317.137	7.59555	8.79134	8.28222	-2.56361
MYRF	5.49314	5.63992	5.30319	8.07049	6.67402	5.48941	1.06618	0.626509	1.08991	-2.56238
MCM6	14.3929	12.5058	13.7374	10.0461	9.1531	9.63273	2.08556	2.33432	2.46361	-2.56155
PCDH18	28.5459	26.7803	29.026	117.89	119.315	122.578	4.963	4.39299	4.94928	-2.55988
CASP1	9.01314	9.56245	10.7042	48.5141	47.9114	47.8874	1.58174	1.06224	2.34071	-2.55433
NPTX1	65.5453	70.7957	68.1672	77.8803	67.0871	66.7466	11.5332	11.1299	12.2947	-2.54847
TRO	38.1539	34.422	32.9188	66.6055	51.5647	60.7987	4.34317	6.83608	6.93459	-2.54201
HEPH	6.19418	6.14603	6.66455	14.2671	12.2287	12.2365	1.38836	0.888345	0.992428	-2.53938
SFXN2	2.40253	5.96828	4.86962	1.65793	2.31037	3.2012	0.240929	0.991024	1.05084	-2.53608
RBL1	3.08108	2.66135	3.25716	1.12298	1.18237	1.82137	0.652764	0.421935	0.480449	-2.53281
ARHGEF26	1.54925	1.53069	1.76187	0.971911	0.902922	1.10251	0.317784	0.269731	0.25026	-2.53091
MXRA8	190.716	213.883	196.85	189.173	165.06	172.357	34.8413	34.155	35.4524	-2.52565
KCNE4	2.02364	2.50189	2.27871	3.8015	4.74491	3.29555	0.507335	0.430618	0.245867	-2.52298
SERPINB9	1.5873	2.04595	1.25199	2.04604	1.96801	1.91543	0.22525	0.158833	0.466665	-2.52163
SORT1	20.6895	20.08	21.8912	20.9982	21.769	22.9552	4.03868	3.38144	3.49714	-2.52095
TRAF5	4.07949	3.24415	3.00146	2.72933	3.30903	2.85867	0.523844	0.725578	0.550802	-2.51991
STX18-AS1	1.48367	1.15177	1.05722	2.68759	2.9724	1.48266	0	0.491786	0.152096	-2.51979
TRIM59	8.45162	8.76451	8.69649	3.96154	3.01583	3.18713	1.82301	1.32495	1.38624	-2.51473
ECHDC2	5.88453	5.8371	4.4261	7.95234	7.07349	7.43234	0.737636	1.15587	0.938376	-2.5115
SORL1	1.09712	1.12389	1.24655	0.983445	1.88528	1.45807	0.187149	0.209947	0.213344	-2.506
RMI2	8.83557	10.5744	10.3184	12.1944	10.9158	10.6691	1.93822	1.95247	1.35864	-2.50164
DCLK2	3.35434	3.23252	3.29684	1.19728	1.43672	1.50265	0.391475	0.817914	0.54544	-2.49372
PLCD1	32.5879	31.5876	29.7642	29.4458	26.2591	22.6701	4.87486	6.3657	5.46323	-2.49156
ZNF436-AS1	1.1137	0.451077	1.01211	2.10512	1.00889	1.20972	0	0.299603	0.158843	-2.49081
DOK6	2.02544	1.63697	2.33296	3.10176	3.1573	3.77086	0.375622	0.343347	0.352694	-2.484
ZNF395	2.18033	1.79216	2.21775	5.62896	5.79674	5.10108	0.540187	0.272078	0.294511	-2.48363
FOXC2	7.36595	7.88183	8.9371	6.69728	4.30746	4.72493	1.4973	1.40775	1.42858	-2.48046
NCAPD2	201.678	190.826	205.057	120.665	110.34	112.694	37.1666	31.9198	38.2752	-2.47661
PALM	18.0854	18.8355	17.8634	30.4902	29.0578	28.3175	3.50156	3.20509	3.19401	-2.46816
MBP	0.865093	0.839466	0.976033	1.67901	1.90645	2.32336	0.162662	0.191166	0.133025	-2.46099
COL1A2	1098.62	1038.31	1071.47	1623.09	1395.42	1336.32	197.447	188.531	199.053	-2.45527
LRRN3	20.6545	19.3398	20.7959	13.4293	15.6907	16.9816	4.01082	3.55285	3.55748	-2.45053
TBX18	1.49491	1.1605	0.946871	2.579	4.39255	0.746946	0	0.660683	0	-2.44688
OPN3	22.8044	23.1224	27.2672	40.1448	33.5657	34.2609	3.26694	3.42807	6.7429	-2.44542
PCDHGB3	1.14798	1.25575	1.14027	3.07876	2.63441	2.99837	0.117738	0.27674	0.256764	-2.44412
APOBEC3G	0.874203	1.04407	0.894468	2.64509	1.40111	2.28482	0	0.297199	0.220597	-2.44152
FBXO4	5.48895	6.92425	9.77819	8.52254	10.4468	8.57066	1.03208	1.51617	1.5474	-2.43784
IFIT2	1.76741	1.37204	1.81355	3.21987	3.17261	3.42645	0.372201	0.437425	0.115957	-2.41987
MX1	3.07515	3.51805	4.76697	7.03641	7.78207	21.0262	0.486917	0.715306	0.92914	-2.41414
SYNPO2	3.19767	3.06644	3.2466	6.29541	6.68261	6.14038	0.565884	0.526497	0.694173	-2.41237
RP11-490M8.1	8.76114	1.56953	5.76272	4.18559	2.70034	3.03064	0.506873	0.595697	1.93444	-2.40574
GLT8D2	16.9251	19.5556	17.2647	34.7671	26.4955	31.5327	3.84846	3.13121	3.17418	-2.40411
PCDHGA6	1.03313	1.12283	1.79137	3.20822	3.8498	3.53607	0.27196	0.114149	0.360092	-2.40324
MTCL1	24.4158	23.8767	24.7548	19.379	19.3586	19.3771	4.28262	4.4421	5.09432	-2.40217
JADE1	13.1991	12.64	14.7786	23.8108	23.0979	24.2684	2.44922	2.51097	2.72747	-2.40149
PRDM8	178.249	178.795	186.867	143.2	130.964	145.844	29.7282	35.4417	37.8704	-2.40016
MNS1	5.26268	7.46034	5.21745	3.78955	4.4007	3.42986	2.06511	0.4045	0.938251	-2.39628
HACD4	1.40232	1.18127	1.304	1.88395	1.79326	1.80389	0.269286	0.237357	0.232458	-2.39504
STON1	5.88332	5.89045	5.43301	14.0011	11.1038	11.5938	1.07521	1.06923	1.12732	-2.39484
CYP2U1	9.90331	9.56636	8.67438	8.67596	9.19557	8.60031	1.57598	1.63166	2.14807	-2.39368
OXCT1	14.67	13.9599	15.4943	6.40563	9.33481	8.69416	2.79259	3.12108	2.53754	-2.38434
SFRP1	374.026	387.44	398.245	224.685	293.857	298.32	77.188	70.7903	74.8894	-2.37951
EFS	17.0874	18.6078	15.9716	12.1192	10.7771	9.88183	3.03441	3.46127	3.43849	-2.37877
NFIX	106.653	109.54	109.123	142.08	130.435	133.01	21.7802	19.77	21.0461	-2.37769
RP1-152L7.5	4.99163	4.97765	5.28233	2.18439	1.30085	1.7033	0.793584	1.29136	0.865328	-2.37004
RP11-166D19.1	195.644	160.722	165.645	89.5503	88.3802	102.293	27.5666	38.8184	34.6623	-2.36905
GLI2	121.807	127.317	122.755	71.598	74.9522	75.8605	23.2303	22.8792	26.044	-2.36569
RNASEH2A	15.3501	14.7926	16.3945	6.13647	4.58107	6.34744	3.18482	2.80719	3.03865	-2.36548
RARRES2	0.517378	0.401641	0.921673	24.0995	17.6209	18.2252	0.194563	0.0571645	0.106076	-2.36301
FHL1	76.1671	77.69	75.4106	203.1	191.08	206.259	13.4718	15.4695	15.97	-2.35188
RBMS3	6.09429	5.65029	6.24295	5.74024	5.83273	6.10458	1.43373	1.14885	0.94748	-2.34924
GALNT16	4.111	2.73546	4.09184	31.6112	30.4341	30.5181	0.294469	1.21125	0.642181	-2.34839
IDH2	29.7109	25.4457	26.9668	25.0203	20.4708	21.5932	5.37127	5.46277	5.33125	-2.34489
LOXL1	94.246	108.456	105.946	157.445	149.064	154.832	19.8434	20.1513	20.8386	-2.34303
PLEKHG4	3.76255	4.18841	4.13123	1.35946	1.90582	1.98641	0.453844	0.925564	1.0043	-2.3416
RPL39L	11.7097	10.2632	14.8936	6.64695	3.63243	6.22836	1.98868	2.50412	2.78803	-2.34014
HS6ST1	147.157	155.858	154.906	268.567	242.926	258.839	32.5233	27.887	30.0355	-2.33998
OSER1-AS1	1.11262	1.59458	1.54499	2.1262	1.92041	1.79609	0.257482	0.302603	0.280759	-2.3383
CASS4	10.1715	10.0896	9.8429	12.2835	11.5474	11.0117	2.0542	1.5817	2.31715	-2.33825
BDNF	58.2361	59.4474	61.199	41.746	46.7992	49.9838	12.3213	11.5219	11.5605	-2.33704
FAM69B	1.25696	1.37757	1.54548	2.60219	3.0811	2.36443	0.333661	0.130711	0.363826	-2.33546
NCAM2	2.19826	2.1655	1.8725	5.86909	5.71004	5.90854	0.478897	0.361812	0.39786	-2.33201
PLCE1	1.53855	1.11475	1.17916	0.955543	1.57816	1.36325	0.37029	0.172259	0.218707	-2.33182
RAD51D	0.654434	0.805191	0.856407	0.818009	0.791609	0.653989	0.111443	0.207373	0.141771	-2.33011
CAV1	370.446	375.175	376.963	331.615	342.843	334.415	76.0174	72.1241	76.0821	-2.32381
SIX1	8.85778	7.81071	8.65033	31.8193	30.174	30.3489	1.39276	1.69139	1.97427	-2.32345
RECK	34.1377	31.8484	32.9855	42.8321	45.7362	46.0912	6.18638	6.53451	7.05604	-2.3232
PIF1	3.02932	2.92176	2.35484	1.14025	1.25058	0.917351	0.483293	0.770837	0.41406	-2.31586
FANCB	1.78986	2.31578	1.41712	0.441121	1.29773	1.14984	0.19231	0.602696	0.314544	-2.31541
LINC00968	3.06138	3.73458	3.94739	26.7091	33.6451	39.3339	0.657856	0.966424	0.537997	-2.31282
MRGPRF	24.5048	27.7837	27.3664	45.3904	44.959	43.8208	5.17342	5.13001	5.77333	-2.30879
CTD-2015H6.3	3.10736	3.65995	2.54508	1.55278	3.43466	2.24863	0.967066	0.473556	0.439372	-2.30842
PAK3	0.521112	0.269693	0.495107	1.79804	1.1136	1.73586	0.261289	0	0	-2.29907
LRIG3	6.32288	5.22177	5.01678	15.4571	13.7454	15.3596	1.11299	1.12966	1.13087	-2.2955
PSMB9	1.71291	2.17593	2.36718	7.09225	7.73687	6.69139	0.468473	0.550569	0.255413	-2.29537
CGNL1	0.854973	0.331858	2.23384	6.19496	6.85146	6.62154	0.321517	0.37786	0	-2.29014
LAMA2	5.10463	5.34323	4.91067	5.24415	6.06937	5.95775	1.09693	1.01775	1.02822	-2.28887
ROR1	8.82839	8.80569	8.28615	34.6705	31.2147	28.3386	2.41452	1.22964	1.66744	-2.28686
MAPT	1.13355	2.81591	0.646187	2.3467	2.18013	1.35933	0	0.200391	0.743702	-2.28327
GTF2IP4	0.785976	0.583625	0.746753	1.34417	1.42402	1.57088	0.205614	0.120823	0.112101	-2.2708
ZFHX4	6.81794	7.17085	7.19651	6.77505	7.07808	6.11	1.69384	1.24417	1.45738	-2.269
RBPMS2	1.05953	2.19338	1.94621	1.90102	2.94346	3.10586	0.318755	0.124871	0.637216	-2.26611
VSTM4	3.06781	3.53487	3.66631	7.66922	7.88556	8.05959	0.638508	0.579854	0.91776	-2.26523
PRDM5	49.3319	49.2383	58.5876	44.9851	49.8868	40.4952	6.18385	14.535	12.0409	-2.26222
PPAP2B	45.2185	43.5081	46.7349	131.771	112.402	115.085	9.29832	9.73564	9.21721	-2.2615
SERPINF1	12.9066	14.1014	12.7924	189.841	135.479	133.915	2.63653	2.46476	3.20157	-2.2611
PACSIN3	12.7813	13.091	14.3688	16.6243	11.9049	15.3138	2.41583	3.07578	2.90863	-2.26017
TAGLN	969.761	994.139	978.944	518.346	514.61	504.672	197.11	202.872	214.385	-2.26004
PSIP1	22.5103	21.4592	21.6308	24.3633	21.5645	21.5791	4.57723	4.0183	5.1113	-2.25881
NMI	3.49549	3.42143	3.53764	6.44988	5.60233	6.83435	0.57152	0.873176	0.747826	-2.25347
USP1	50.9616	46.7448	60.6215	38.0265	34.3091	38.5058	11.8414	10.6205	10.7599	-2.25271
SSH3	9.75126	10.2044	10.9788	14.5847	15.7664	14.8531	2.39083	1.97445	2.14899	-2.24754
RP11-253M7.1	1.32089	2.15876	2.37785	2.01493	2.22846	1.66737	0.418299	0.245801	0.570144	-2.24666
LRRC2	2.95024	2.21519	3.12467	4.50567	3.79826	3.62489	0.654761	0.577126	0.515634	-2.24608
HSPB1P1	3.3723	8.22775	2.7463	2.99204	3.86064	2.88858	1.44934	0	1.58037	-2.24343
ATHL1	3.68482	2.73051	2.97049	3.75642	2.50548	3.15229	0.461899	1.08568	0.434977	-2.24312
ZNF660	7.02512	6.46353	7.16895	10.773	10.0083	15.6008	1.95691	0.919938	1.49368	-2.24079
HHEX	11.8545	10.3114	10.5166	11.2359	11.3311	13.4879	2.68552	2.14617	2.10838	-2.2355
SCN9A	26.4639	24.1901	25.899	13.1477	14.9948	13.3491	5.73564	4.64263	5.8814	-2.23516
CBR3	6.01352	6.2244	5.91389	3.93138	2.87451	3.37372	1.26957	1.11903	1.47086	-2.23364
PALLD	105.05	104.592	106.888	87.2021	94.3237	92.3338	22.0358	22.4256	22.8439	-2.23355
ANXA2R	0.883294	1.3714	0.734313	3.42866	1.7696	1.82056	0.166084	0.243985	0.226373	-2.23157
KIAA1614	15.6286	12.66	15.4943	28.1345	25.5929	26.4826	3.57743	2.40248	3.34359	-2.23142
ZNF300	2.10744	2.07381	2.17148	2.15072	2.14077	2.34331	0.491136	0.550966	0.316454	-2.2253
COL16A1	29.2414	29.844	28.9465	40.9066	30.9454	30.3818	5.56288	7.12687	6.15395	-2.22394
APPL2	23.7217	23.5288	23.1167	19.2338	15.6228	16.0954	4.98297	5.45231	4.65279	-2.22149
NALCN	1.66418	1.8536	2.02797	0.78641	1.13067	1.35574	0.299306	0.479668	0.415374	-2.21516
ACBD4	5.86288	7.15214	3.58091	13.4379	7.71865	12.5548	0.314967	2.40605	0.858604	-2.21295
LAMA5	37.7991	47.5493	41.1555	118.236	157.866	144.89	8.50798	9.51117	9.27715	-2.2124
TES	19.8161	20.4422	20.0066	23.5864	23.4469	22.5493	4.86795	4.19279	3.96285	-2.21019
DDAH2	67.116	70.3512	72.6681	97.685	85.1815	89.5407	16.6554	13.8524	14.948	-2.20878
RAB26	2.15863	2.90463	2.73455	6.25641	4.3823	5.75244	0.216471	0.763216	0.708123	-2.20792
CALHM2	4.68426	5.81823	5.02271	5.95703	7.0786	5.55042	1.20791	1.12384	1.04272	-2.20188
EFEMP2	547.376	617.116	597.098	785.241	680.724	726.539	119.919	135.111	128.711	-2.19867
RHOD	9.61296	11.0242	11.209	10.1767	7.35334	5.56736	2.95773	1.93114	2.0605	-2.19617
MASP1	2.33756	2.105	2.1987	11.0336	8.76678	8.97015	0.386784	0.41324	0.651797	-2.1936
RND2	1.47113	4.94884	2.79543	6.59875	9.03834	5.88053	0.737636	1.08362	0.201081	-2.18802
TSHZ1	7.09048	9.20587	7.76944	9.92233	9.42392	9.01139	1.70948	1.48495	2.0869	-2.18801
DENND2D	1.03857	1.41092	0.740055	2.95635	1.45648	2.33519	0.585838	0.11475	0	-2.18671
MEIS2	13.5555	11.3968	12.466	10.1662	8.52639	9.04793	2.84698	2.37377	2.99949	-2.18649
NTN4	18.6274	16.8441	18.6378	56.5732	47.7895	50.7304	3.84887	4.0107	4.02895	-2.18631
KATNAL2	2.10429	1.56254	1.3908	4.54577	5.71878	5.3943	0.412868	0.32348	0.375161	-2.18594
NR2C2AP	3.15862	4.45826	5.45636	5.35015	4.37209	5.02167	0.215967	1.14216	1.53069	-2.17807
GARNL3	1.77159	1.2695	1.0358	2.25698	0.873656	1.77039	0.20499	0.361368	0.335282	-2.17685
PPARG	7.76544	8.82888	7.26173	7.08873	6.07596	7.27134	2.02347	1.29713	2.00582	-2.16312
STMN1	161.719	155.72	165.938	86.7776	93.6773	94.7675	32.8788	35.1555	39.9922	-2.16176
RP11-802E16.3	1.51325	1.17474	1.79717	2.34958	0.606333	3.02444	0	1.00318	0	-2.16057
TLE4	19.5592	17.9822	17.7903	16.031	14.9786	16.1104	4.11699	4.10088	4.21545	-2.1539
SLC44A2	287.7	304.868	299.137	267.956	260.405	290.449	64.2656	68.8305	67.3139	-2.15361
DEK	52.4341	49.2814	50.9116	39.3375	36.5683	37.0422	11.0974	10.9108	12.3367	-2.15184
POLA1	2.8101	2.68759	2.99026	1.62892	2.08978	1.63999	0.574875	0.635874	0.700593	-2.15083
CACNA1C	0.915697	0.882958	1.01653	2.55421	2.53357	2.21544	0.188488	0.264118	0.181813	-2.14972
TMEM121	1.20754	1.74984	1.30025	1.83324	1.80634	1.44806	0.121094	0.640414	0.198062	-2.14959
FKBP5	4.64285	4.26418	5.40522	2.30141	2.04372	2.05846	0.885281	1.24272	1.09939	-2.14881
XAF1	1.65847	0.936343	0.859477	4.05767	4.34959	10.0947	0	0.533069	0.247295	-2.14617
HS6ST1P1	1.29926	2.01724	2.08902	4.1381	3.20364	3.39576	0.300673	0.265023	0.655712	-2.14589
CCDC8	6.41024	5.30405	7.11148	9.93312	10.0278	7.94023	1.27026	1.25536	1.73137	-2.1448
PTK7	44.3145	46.8396	43.6116	115.349	96.195	94.9734	8.42463	11.6872	10.3701	-2.14443
AP4S1	9.48691	9.24198	9.36695	8.47219	9.83851	10.0381	1.95869	1.80866	2.59342	-2.14308
PCDHGA7	3.51615	4.40256	3.197	6.88788	9.27121	8.68995	0.739332	1.00257	0.775165	-2.14279
GYG2	6.99878	7.63579	8.38678	9.65938	11.7224	12.7909	1.89689	1.72771	1.60299	-2.13876
CCDC80	59.4523	56.2123	58.3614	101.677	96.4311	98.6465	13.2682	12.9622	13.3366	-2.13693
SPATA6	1.1408	1.38616	1.0603	2.41305	2.26561	2.55265	0.186523	0.284972	0.345755	-2.13403
NDRG4	31.7197	38.572	36.2485	25.7158	33.7736	30.3682	7.34054	8.82296	8.18608	-2.12943
CRABP2	14.6703	14.477	15.1194	14.6707	5.97776	8.32408	3.36621	3.18686	3.56857	-2.12878
MTMR11	7.35629	6.05831	6.13833	7.81325	7.68924	7.28737	1.25088	1.7528	1.46889	-2.12821
NGF	2.47366	3.29196	2.79788	0.975438	0.377583	1.05942	0.177188	0.624714	1.15924	-2.12651
FAM122C	1.43476	1.11381	1.41996	2.35148	2.20373	1.67275	0.3597	0.158525	0.392219	-2.12396
ACOX2	10.9498	13.4216	8.76077	18.294	10.7761	14.2059	1.73379	3.05643	2.8358	-2.11924
SGCD	21.1373	24.4099	25.1446	143.754	105.832	97.2353	5.12401	4.70947	6.44682	-2.11841
PYROXD2	3.05634	3.20808	2.65843	3.47557	3.44965	3.44143	0.582771	0.837095	0.635457	-2.11814
TMEM117	22.1201	21.0598	27.7573	28.945	30.7701	25.2331	5.96412	5.53364	4.96305	-2.10751
FAM117A	1.77303	1.05254	1.18909	0.971623	1.67158	0.62535	0.39221	0.414847	0.1283	-2.10169
GPR85	1.32161	1.25914	1.48395	0.621824	1.01095	0.750403	0.361453	0.292046	0.295597	-2.09852
TMEM35	17.3055	17.4471	16.7622	28.9635	23.4136	25.4915	3.97231	3.57581	4.51575	-2.09429
SSBP2	2.30366	2.6825	2.60241	6.16493	5.04293	6.17634	0.528233	0.720129	0.529909	-2.09335
SLC37A4	2.64526	2.69314	2.71926	3.50124	2.50208	2.29678	0.847996	0.651623	0.391202	-2.09135
AC025171.1	1.72135	1.72931	1.44305	2.51548	3.5703	3.74393	0.456935	0.447507	0.249122	-2.08483
HMGN2	531.089	546.921	548.893	269.683	231.638	263.824	122.324	137.288	123.901	-2.08478
CD37	2.40757	0.844065	1.10682	1.12547	1.12027	1.55222	0.233647	0.480534	0.318462	-2.07748
AC144831.1	0.928689	0.648848	1.41175	2.8839	3.42341	2.92338	0.279391	0.20522	0.228487	-2.06763
SDC3	47.6379	51.6151	52.5382	62.1926	66.1459	67.6388	12.538	11.0855	12.6429	-2.06538
FAXDC2	4.02121	2.94497	4.2891	14.7648	13.8019	15.5053	1.19835	0.838301	0.653342	-2.06493
TMPO	28.1432	29.115	27.7884	11.3757	11.8822	12.4931	6.82235	6.91287	6.6523	-2.06057
S1PR1	6.14742	6.58241	6.48512	38.1797	30.7131	31.6483	1.14791	1.68634	1.77323	-2.06018
H2AFY2	10.9004	11.4116	11.9542	14.5714	14.7749	17.242	2.34237	2.91801	2.96279	-2.05902
PLAC9	12.7025	11.116	10.9715	21.5158	12.2152	13.6171	2.43185	3.2663	2.6517	-2.05885
RP11-888D10.3	0.793969	1.23272	0.754347	1.6437	1.27252	5.02506	0	0.233933	0.434092	-2.05765
DKK3	658.923	700.766	706.729	442.923	482.91	477.892	164.167	162.412	169.983	-2.05709
CTD-2334D19.1	1.2178	1.89076	1.78813	0.458386	1.06462	1.54887	0.333062	0.391428	0.453965	-2.05491
GBGT1	0.7011	0.890615	1.27167	1.18754	1.12368	1.14648	0.191747	0.394361	0.104541	-2.0517
LTBP4	69.2558	82.6313	68.3928	898.391	795.033	735.386	16.4218	18.6965	18.0464	-2.0508
BMP4	3.53842	5.09421	4.15645	62.7315	56.6082	55.0975	1.35483	0.796128	0.949704	-2.04426
TBX5	11.6622	11.5904	13.7603	14.1014	11.1927	12.3418	3.31185	3.0408	2.62381	-2.04381
RP11-57H14.4	1.65915	1.40098	1.38276	2.41039	3.12569	2.23978	0.218923	0.360202	0.501301	-2.0399
CIART	4.15898	3.97369	5.77518	5.29849	4.10199	4.15616	0.962467	0.989739	1.44303	-2.03431
CTIF	25.5025	26.3413	24.8412	18.6051	18.357	18.6048	6.16234	6.67347	5.89271	-2.03371
ADAMTS8	0.986639	0.425516	0.468701	61.8444	66.2396	60.5275	0.0824513	0.24225	0.134858	-2.03307
PTGDS	1.11948	1.15874	0.886349	14.2918	11.6625	13.9841	0	0.164921	0.612064	-2.02605
CREB3L4	5.86251	6.40521	9.28325	11.2377	10.092	7.16043	1.63306	1.34347	2.3149	-2.02602
CTHRC1	83.1579	74.7248	79.008	81.1563	69.828	72.435	17.9531	20.2415	19.9741	-2.02591
SSPN	18.0646	14.8892	15.0442	25.3936	25.0208	19.6124	4.02565	3.74546	4.02379	-2.02481
FBXO15	2.05265	1.59347	2.43777	1.7706	3.01569	3.58969	0.771909	0.302393	0.420847	-2.0247
SOX6	1.82026	1.60873	2.04871	3.82634	3.85994	4.54757	0.48443	0.334167	0.528224	-2.02401
MR1	7.24501	9.45907	9.07365	12.9535	13.987	16.4548	0.990737	3.05643	2.29565	-2.02293
GPSM2	1.95788	2.24121	2.49074	1.47704	1.30305	1.60835	0.524126	0.513311	0.612331	-2.01971
RIMKLB	28.9933	27.8825	23.8462	17.9173	25.3149	28.7574	6.50932	7.65001	5.85568	-2.01188
SLC16A5	2.19905	2.08648	2.03127	1.26459	2.83917	2.74694	0.735079	0.431947	0.400767	-2.01046
P4HA3	10.2775	13.6773	11.7175	13.9819	12.2364	13.4984	2.65022	2.85509	3.37145	-2.0067
CXXC5	122.594	129.051	133.016	90.3522	86.8467	95.5586	30.2431	31.4251	34.1837	-2.00471
MCM3	17.3214	17.7011	17.5592	8.44721	9.42482	10.1539	4.27233	4.38455	4.46173	-2.00294
HOXA4	1.4825	1.86331	2.14631	1.31533	1.58403	2.61025	0.637145	0.561599	0.173687	-2.00063
NAALADL1	0.893695	0.27751	0.679277	1.48012	0.286471	0.893088	0	0.315979	0.146585	-2.00018
GPC2	1.36384	1.73937	0.971833	1.81508	0.936799	1.11953	0.366342	0.21527	0.439407	-1.99681
BACH2	0.419535	0.651371	0.462889	2.57759	1.84368	1.59586	0.162858	0.15551	0.0665929	-1.99432
FLOT1	98.4769	98.3418	104.37	96.9349	88.4059	92.7266	26.8371	23.2762	25.4935	-1.99408
EVL	14.1517	13.5087	10.4078	24.1974	21.3374	20.7942	3.23253	3.66001	2.66506	-1.99387
MAPK10	0.630613	1.02571	0.627674	1.42985	1.54012	1.3804	0.271023	0.106173	0.197017	-1.99191
ATP6V1G2	2.15167	1.67034	2.60183	4.65693	2.35128	4.30042	0.441353	0.778044	0.401045	-1.98705
XRCC6BP1	3.32127	4.12529	5.04885	4.58386	4.96823	3.09775	0.333062	1.56571	1.2711	-1.9789
HADH	8.73561	9.79545	10.3746	8.16324	9.43112	8.54781	1.91629	2.68108	2.78605	-1.96899
ADAMTS2	16.5803	16.6136	17.7307	11.1519	9.80421	10.821	4.03772	4.19652	4.77714	-1.96859
ELFN1	4.97169	4.33263	4.41883	3.38657	3.85562	3.20536	1.01322	1.07737	1.42048	-1.96663
DERA	19.1686	19.6536	20.1363	13.1779	14.2597	13.6619	5.00511	4.15591	5.93217	-1.9658
PARP9	4.49476	4.52995	4.49522	10.1214	11.8801	13.0811	1.36408	0.836414	1.26106	-1.96559
NRM	10.867	11.7786	12.7597	5.94263	5.0936	6.55674	3.08421	2.53728	3.44712	-1.96501
MAP3K14	2.29515	2.01786	1.83907	3.03408	2.9694	2.23833	0.54074	0.53773	0.498914	-1.96354
STARD5	1.26596	0.668281	1.13062	1.99183	2.11015	1.74584	0.2666	0.290939	0.228409	-1.96332
FER1L4	1.22109	1.26391	1.48242	1.26397	1.73962	1.49143	0.204087	0.479704	0.333807	-1.96303
ZNF273	1.40455	1.34197	1.28313	1.11836	1.90478	0.971717	0.487557	0.238749	0.31012	-1.95903
CAMK4	26.7916	25.4393	26.9272	24.7528	24.8412	21.9055	7.32736	7.24141	5.81076	-1.95761
LOXL1-AS1	24.8338	23.1863	21.6814	22.9268	26.8932	27.1645	5.55285	6.08098	6.33007	-1.95609
ACADS	2.65634	2.4549	2.22333	3.27335	4.96696	3.9818	0.761089	0.559039	0.570553	-1.9558
IL11RA	2.66504	2.35533	3.50591	3.98939	4.20563	4.79382	0.925111	0.869782	0.403498	-1.95547
KCNAB2	8.85214	9.55081	6.55726	6.83341	12.2639	10.1955	1.8055	2.78499	1.84568	-1.95535
GSTM2	15.9687	13.7247	15.646	24.9418	17.3671	19.1637	4.07491	3.8438	3.80019	-1.95193
CARD10	12.1681	13.1539	11.939	10.3588	11.0269	10.2847	3.59228	2.46271	3.59062	-1.94972
NOD1	0.877207	0.978904	1.01574	0.96476	1.05445	1.23274	0.164939	0.266535	0.314739	-1.94433
ALDH3B1	16.4981	16.8807	16.754	15.1177	13.9579	13.4057	3.90559	4.73344	4.39176	-1.94383
TMEM52B	1.65957	1.61961	2.83816	2.94488	1.7479	2.65351	0.499273	0.586765	0.505523	-1.94246
PKNOX2	3.03093	2.68904	3.35962	8.96387	10.9878	10.2405	0.651312	0.765449	0.946926	-1.94159
TMCO4	5.80571	6.50293	6.73738	5.66617	6.18117	6.17474	1.68424	1.57617	1.70046	-1.94082
ZNF785	13.5935	11.512	11.5062	12.7916	19.41	14.8192	1.4871	4.80617	3.24308	-1.94079
PIR	6.80717	8.70374	8.36966	10.3621	6.41768	11.8044	1.80697	2.12362	2.29872	-1.93869
HSPB6	195.713	196.287	184.368	128.442	98.4694	93.6791	49.8417	51.2373	49.3338	-1.93806
AFF3	7.47568	7.83504	8.38751	11.4323	10.8977	10.2987	1.99661	2.02552	2.16685	-1.93701
KCNAB3	1.30455	0.856918	0.858078	0.830988	0.884586	1.3538	0.226423	0.399151	0.164595	-1.9341
RP11-545I5.3	2.76112	0	1.31166	4.76345	10.3258	6.8981	0.692222	0	0.377401	-1.92891
PTCH1	2.03585	2.234	2.61779	5.54563	4.44052	5.30798	0.59866	0.635918	0.577461	-1.9264
RP11-644F5.10	2.04747	3.1789	1.94529	1.9947	2.12335	0.601788	0.543502	0.851661	0.493865	-1.92466
SCHIP1	1.94929	1.39683	1.21093	0.931262	1.08145	1.19875	0.112775	0.596422	0.491883	-1.92377
PCOLCE	115.939	115.092	112.631	267.322	184.425	185.738	31.1736	29.2067	30.248	-1.92296
PCDHGB1	1.18952	1.18199	1.08496	5.91021	3.88924	7.37004	0.143145	0.378516	0.390214	-1.92239
ABCC9	2.09689	1.43156	1.56837	1.16993	0.8819	1.02544	0.380292	0.368064	0.597616	-1.92095
SETBP1	3.31643	3.00364	2.23191	21.0264	24.6942	18.4351	0.623582	0.671787	0.963272	-1.92081
KAZN	4.76381	5.0336	4.92421	5.06807	5.16077	3.94511	1.36018	1.24764	1.28419	-1.91935
RP11-426C22.4	2.52653	2.91921	1.89803	4.0141	6.21528	5.81294	0.530297	0.882904	0.530052	-1.91805
SDK1	0.711724	0.976104	0.924149	9.65097	9.18265	8.79567	0.267648	0.220185	0.204291	-1.91604
CCDC89	1.39751	1.49172	2.07463	1.08493	1.53988	1.48384	0.131385	0.540431	0.644682	-1.91476
PRICKLE1	5.83647	6.78805	5.70652	7.03001	7.14328	7.08384	1.53239	1.51954	1.81017	-1.91464
HOXB4	5.71184	5.81021	5.27086	8.35893	7.78663	8.9228	1.48136	1.30571	1.66912	-1.91397
NAT1	5.47356	3.25465	5.31106	3.13425	3.73304	3.84053	1.05108	1.33821	1.33712	-1.91361
CNTLN	10.3137	9.01787	9.64427	11.5749	13.224	12.3138	2.28628	2.83087	2.58201	-1.91208
FTX	3.20635	2.66688	1.74077	2.1336	4.77185	4.69182	0.86126	0.506094	0.657386	-1.91092
CCDC61	10.5282	13.6773	12.0442	6.67215	6.19854	8.58858	3.23198	3.41851	2.99554	-1.90996
SALL2	5.06596	4.92073	4.50492	8.16283	6.75948	7.33192	1.31385	1.14704	1.41216	-1.90368
C5orf38	2.54945	1.48436	3.02779	1.31949	3.06457	2.86619	0	0.845059	1.04541	-1.90125
CYR61	297.607	313.144	290.482	164.899	173.237	152.47	79.796	78.0226	83.4765	-1.9011
SKP2	29.8495	25.4147	26.6065	24.0869	20.3195	20.5277	7.72478	7.94367	6.25155	-1.9011
ARHGEF19	3.39384	3.10512	3.80028	3.26209	4.1767	5.45069	0.911624	0.803533	1.04374	-1.90037
GABARAPL1	233.191	230.031	252.698	395.076	357.097	369.901	66.6391	62.3954	62.9485	-1.89882
LINC00654	0.746476	0.908389	0.920074	1.21124	1.29341	1.10887	0.182086	0.196162	0.314367	-1.89441
TSPAN11	2.3933	3.13524	2.13175	13.3157	14.7439	17.4891	1.01252	0.132217	0.920044	-1.89141
RP4-545K15.5	1.69203	0.875681	1.42897	0.389209	1.80791	0.751501	0.282798	0.332356	0.462547	-1.89084
GPR161	5.80701	5.36665	7.04978	6.77421	6.64791	6.58602	1.38651	1.87391	1.66305	-1.88805
TEAD4	8.89	10.2935	9.59162	6.39472	6.39965	6.24889	2.71984	2.7969	2.28608	-1.88275
PPP1R14A	3.04769	1.89274	2.31648	1.26188	1.95385	1.42129	0.611254	0.359185	0.999771	-1.88101
ANKRD35	1.91896	2.06264	1.50764	1.83354	1.47864	1.62263	0.333062	0.619761	0.544759	-1.87397
HIRIP3	2.54814	3.33455	3.11268	2.78833	3.09216	2.80105	0.82135	0.772226	0.86575	-1.87092
GNB3	2.23533	1.33484	0.980205	0.533958	0.826761	0.988031	0.129324	0.797931	0.317285	-1.87037
TCEAL3	38.7868	37.9514	38.0028	30.1116	26.8733	27.1525	10.4837	10.7138	10.1889	-1.87017
RFX2	1.32812	1.48659	1.20315	1.27884	1.63359	1.14203	0.603982	0.191107	0.303962	-1.87017
RP11-380L11.4	0.791845	0.922065	1.69274	0.409825	1.58639	1.38479	0.595555	0.17498	0.162349	-1.86858
ARID5B	53.9676	49.7694	56.3825	114.508	120.813	123.168	14.482	14.6437	14.9581	-1.86083
NNAT	5.03969	4.72431	5.14957	24.2132	23.3174	21.7605	1.43034	1.42885	1.24772	-1.8605
STOX2	16.9081	17.3724	17.718	97.8044	94.8472	80.5076	4.8623	3.9561	5.5058	-1.86002
CYBRD1	160.668	153.776	161.675	342.195	321.189	318.31	43.6142	44.1016	43.4924	-1.85946
MAMSTR	0.872775	0.521182	0.829221	0.972916	0.860815	0.67091	0.201977	0.356056	0.0550591	-1.85845
CENPQ	2.70429	3.31475	2.36649	1.62062	2.05307	2.34687	0.321146	0.94356	1.05054	-1.85674
SPACA6P	2.79999	2.42638	1.73226	1.88727	1.04364	1.17129	0.685643	0.863352	0.373814	-1.85559
HMGN5	1.79832	1.26094	2.03927	1.20095	1.76652	1.68116	0.523562	0.461483	0.428171	-1.8511
ZFAND4	1.17964	1.35887	0.795389	1.57557	1.21978	1.10279	0.286201	0.235448	0.405698	-1.84603
DSCC1	2.45167	3.47548	2.78507	1.21371	2.90432	2.39675	0.801709	0.706651	0.917897	-1.84431
KCTD16	1.27969	1.6557	0.810551	0.993467	2.22191	2.23793	0.320822	0.329913	0.393555	-1.84281
KIAA1644	0.895151	0.765815	0.95462	1.92881	2.02027	2.33677	0.219838	0.209919	0.29964	-1.84236
RP11-49I11.1	1.21507	1.25768	1.53925	4.19246	5.19316	4.85699	0.609246	0.179003	0.332163	-1.84029
ROBO2	3.58384	3.62325	3.3456	5.09003	5.34319	5.47622	1.09698	1.01296	0.837309	-1.84017
TMEM240	2.7483	6.66721	3.59033	4.2672	5.78128	5.14956	1.29189	1.21463	1.12695	-1.83974
VSIG10	4.03951	2.51645	3.43518	2.83919	3.55685	3.48857	0.712656	1.03591	1.04293	-1.83961
ACTG2	158.769	171.945	176.098	97.1576	101.765	104.576	47.0307	47.1007	47.5969	-1.83832
TRIM14	16.9992	16.5624	16.4778	12.1107	10.8098	16.2999	4.14097	4.74497	5.13619	-1.83536
CDKN1B	72.9634	76.931	81.9968	130.197	106.468	115.9	27.4383	19.733	17.862	-1.8342
LDB2	15.1543	12.7655	14.6533	30.4828	22.2211	23.8974	4.28424	3.61	4.05455	-1.83307
DENND2A	4.42469	5.02416	5.89798	27.2069	26.567	29.1699	1.53975	1.28422	1.4894	-1.83105
ITIH3	1.95417	1.01135	1.03147	2.24754	1.392	1.08491	0	0.767695	0.356139	-1.83049
MBNL1-AS1	3.50231	3.72205	3.64783	1.86111	2.37138	2.52669	1.21141	0.893953	0.9523	-1.83014
TRPC6	2.0858	2.15895	1.98172	1.88225	3.08583	2.9128	0.603368	0.425461	0.723707	-1.82897
NUDT17	0.753543	1.81993	0.875036	0.693336	0.939343	0.836701	0.125944	0.296029	0.54932	-1.82799
MAGEE1	1.15516	1.00225	0.645594	1.05505	0.490078	0.64509	0.153319	0.330341	0.306495	-1.82676
AKAP7	1.169	1.29643	1.26933	1.55578	0.669142	1.25165	0.314007	0.295227	0.445114	-1.82467
TMCO6	1.56858	2.02949	1.98707	1.89427	2.19977	1.17564	0.589874	0.346622	0.643202	-1.82195
BEND6	7.36143	6.92201	6.99407	5.25882	4.15436	4.92156	1.63759	2.42861	1.9557	-1.82104
CBX2	1.32784	1.0308	1.11019	1.09957	0.510761	0.87578	0.199737	0.281686	0.500926	-1.82014
OBSL1	73.0292	65.6593	68.8538	123.418	100.624	101.278	20.7374	19.2666	18.7925	-1.8196
LHPP	2.34914	2.5075	3.76635	6.07907	4.94162	3.52132	0.441704	1.03822	0.963272	-1.81942
IFI44	1.95762	1.8704	1.85993	2.49398	2.17214	5.26693	0.453029	0.665523	0.493985	-1.81857
TNS2	13.981	14.9564	12.9618	24.2008	19.5703	20.554	4.15129	4.14234	3.5871	-1.8183
SHISA4	27.7964	26.1874	26.2811	26.8171	28.3305	24.5414	6.90101	8.46816	7.41424	-1.81679
AQP3	5.41929	7.13915	6.55308	28.8979	36.5851	40.8632	1.23512	2.17735	2.02018	-1.81471
C2orf88	0.870052	2.02627	2.89322	0.900603	2.78892	0.434731	0	0.576786	1.0703	-1.81353
MVB12B	2.40569	2.22515	2.84489	3.76173	3.6916	3.50378	0.731437	0.769128	0.629655	-1.81121
RP11-326C3.11	2.0218	2.0927	0.640302	8.37118	4.86061	6.39802	0.506873	0.297849	0.552697	-1.80852
GAS7	2.60437	3.51717	3.60179	16.1111	13.4609	14.5222	0.996772	0.844531	0.935227	-1.80817
SP2-AS1	1.82711	3.30957	6.07576	1.26084	2.4403	2.43449	0.916126	0.538334	1.74816	-1.80778
TNFAIP8	27.1481	26.2535	25.7933	59.4143	56.9374	63.4059	7.46729	7.26751	7.88792	-1.80764
MAGI2-AS3	133.55	122.097	116.846	83.5531	83.8409	89.8381	36.7383	34.7554	34.9457	-1.80718
RHOBTB3	793.386	793.569	793.124	1480.86	1586.13	1533.18	235.201	215.75	229.552	-1.80634
DNAH10OS	0.880928	0.987805	0.929963	1.77306	1.17658	1.10041	0.331278	0.173036	0.301022	-1.79709
TXNDC16	1.32409	1.04887	1.41206	1.67827	1.86231	1.56623	0.447123	0.310509	0.332417	-1.79591
MEX3B	6.92157	7.32712	7.53934	10.2042	8.23603	9.67664	1.68268	2.13205	2.46552	-1.79464
HCFC1R1	27.7332	29.7641	29.7492	63.7641	47.9311	53.2577	9.41996	8.81138	6.91759	-1.7946
CPT1C	59.0905	72.7099	66.6245	87.3066	97.064	95.8037	16.9656	19.722	20.5102	-1.79456
PASK	1.4027	1.29833	1.02516	1.0052	1.21054	0.916529	0.405764	0.381497	0.287591	-1.79356
ARHGAP19	2.67866	2.84191	2.82069	3.14241	2.64745	2.31993	0.570817	0.947078	0.897019	-1.78829
AMIGO1	2.10882	2.10751	1.61208	3.7134	2.87484	3.07631	0.510459	0.621338	0.556607	-1.78744
PKI55	5.56316	5.23109	5.58332	7.46173	6.21627	5.79429	1.76794	1.31591	1.67073	-1.78433
ARHGEF25	9.33485	9.88955	8.66033	15.9149	11.881	15.639	3.05613	2.47535	2.56687	-1.78378
PATZ1	5.25155	5.46947	4.80354	7.63059	7.94632	8.89876	1.2757	1.49925	1.73878	-1.78216
AMOTL2	100.549	98.9837	98.2727	67.073	63.0695	61.8153	28.7284	27.5446	30.3566	-1.78144
AC091729.9	1.49651	1.6401	1.5891	1.64018	1.83415	2.37519	0.397249	0.544674	0.433163	-1.78101
ADCY3	7.42421	7.43178	6.79849	15.2687	14.3649	13.5693	2.0572	2.02915	2.22315	-1.77907
ZBED3	0.819268	0.775608	0.873309	3.14394	3.17058	3.17501	0.240461	0.282599	0.19665	-1.77796
CEP162	1.24366	1.01143	1.46293	1.83905	2.89497	1.77545	0.356332	0.340256	0.388546	-1.77666
CNKSR3	1.50481	1.59091	1.9749	1.92736	1.74551	1.8022	0.484421	0.491677	0.504205	-1.77627
NEXN	194.027	184.053	184.716	233.488	230.687	214.29	58.7539	51.1833	54.6159	-1.77406
HTRA3	3.25191	3.46642	3.59688	5.12451	4.90078	4.21976	1.24115	0.900931	0.875701	-1.77321
TMEM8B	7.72994	8.05263	7.62848	9.08542	8.71227	7.8742	2.02544	2.3363	2.49485	-1.77163
JMJD8	11.3163	12.4961	11.6715	13.6555	16.1003	17.0537	3.00393	3.42336	3.9703	-1.77092
C1orf54	6.6052	5.35722	6.55657	11.8374	8.69029	7.29034	2.22441	1.82995	1.37445	-1.7703
TRAPPC9	4.05219	3.8519	4.26902	6.33452	6.75965	5.92265	1.0781	1.0721	1.42424	-1.76791
STARD10	16.7914	19.7775	27.2309	28.1692	18.0961	19.3838	5.22579	6.39745	7.12278	-1.76697
MB21D2	5.60257	4.60512	6.26234	6.89852	7.21875	6.03789	1.26688	1.68309	1.89194	-1.7662
PCDHGA9	1.53682	1.41673	1.82516	2.58503	3.38678	3.40751	0.505689	0.509405	0.393861	-1.762
ARSJ	34.401	33.2637	34.4204	27.906	33.4464	34.6423	9.68011	9.85491	10.5987	-1.76032
KBTBD7	2.34467	2.54824	2.77221	4.47648	3.96665	3.64479	0.548631	0.967159	0.747787	-1.75971
TRANK1	1.51794	1.4981	1.44219	7.45427	7.56259	8.5488	0.513305	0.436841	0.366707	-1.75938
SERAC1	6.21648	4.4621	4.86746	3.10421	3.85516	3.30904	1.12775	1.90524	1.56275	-1.75818
DVL2	13.8532	13.3873	13.783	19.2041	20.631	21.3986	3.93406	4.15389	4.05512	-1.75631
B4GALNT4	66.0373	59.926	61.5958	111.742	127.588	119.63	14.0611	22.922	18.5471	-1.756
TPPP3	1.16569	0.72394	0.66451	3.13721	3.17609	3.26171	0.175345	0.103037	0.477994	-1.75566
SENP7	3.36694	2.86546	2.51175	2.42671	3.51759	2.7665	1.01293	0.903846	0.674972	-1.75439
SCAI	1.61322	1.74377	1.47451	3.19178	3.68197	2.97937	0.491472	0.523448	0.418675	-1.75284
PRTFDC1	10.8485	10.1454	10.8496	10.6384	8.94778	9.25614	2.67203	3.08421	3.69403	-1.75257
HFE	13.6819	14.6604	11.9922	8.97613	6.33145	7.02888	4.05815	4.59897	3.31877	-1.75188
AASS	4.9205	4.43588	5.32843	5.03851	6.10547	5.55163	1.43255	1.54329	1.3885	-1.75049
PRX	0.919034	0.835255	0.724093	2.22745	2.19148	2.41923	0.202307	0.277386	0.257363	-1.74955
NTF3	19.169	16.8504	17.4089	20.4257	13.1023	17.3249	5.30044	5.85554	4.7393	-1.74901
TMEM237	7.43243	6.36904	6.57959	6.66611	6.85747	7.44943	2.38861	1.85197	1.82681	-1.74808
COL5A2	97.0453	94.6802	96.7721	113.643	114.406	115.992	28.6723	28.0336	29.2121	-1.74753
EPB41L2	74.2286	74.1242	74.438	111.372	113.687	117.154	23.9795	21.4457	21.1476	-1.74269
SLC22A18	9.51767	11.0518	10.4105	11.2593	9.35767	12.1488	2.28586	3.03991	3.93555	-1.74205
TNFSF12	4.92367	8.38428	7.39419	8.54906	10.1823	8.57088	2.26967	1.96546	1.95383	-1.74201
MASTL	4.73167	5.76085	6.01562	4.43975	3.65541	4.18418	1.63856	1.62481	1.67502	-1.74107
MOXD1	8.5069	10.2658	8.58034	16.4427	13.6989	11.5228	2.24389	3.02912	2.90965	-1.74106
PTGS1	45.9838	46.39	46.6587	126.673	128.295	142.146	14.4237	14.0948	13.0774	-1.74091
ETAA1	4.97938	5.32206	4.49092	4.93013	5.78305	5.33658	1.1398	1.65847	1.62753	-1.74084
SRR	40.5581	46.2642	42.073	46.2662	31.8386	37.222	12.4507	14.9984	11.2005	-1.73768
TMEM97	11.0939	9.99167	10.3578	8.55047	5.38806	8.20681	3.03413	3.18378	3.22966	-1.73474
RP1-241P17.4	1.28469	3.32434	1.22058	0.886531	1.37267	0.855876	0.644151	0.757032	0.351193	-1.73409
CIB2	1.15766	1.31809	1.75983	4.47371	4.82411	3.77914	0.348277	0.545745	0.379763	-1.73344
NAALADL2	159.067	163.195	151.13	132.013	180.818	153.357	48.487	43.3573	50.5718	-1.73292
ZNF738	2.07065	1.80348	1.63143	1.3592	1.78076	1.05986	0.455812	0.62497	0.579856	-1.72915
CCDC85C	1.73036	1.68202	1.85845	1.869	1.70016	1.90963	0.463987	0.485446	0.641672	-1.728
STAP2	2.41232	2.80903	0.572984	2.49703	1.93315	1.50668	0	0.266535	1.48377	-1.72704
DDR1	91.8235	95.4795	93.8043	133.59	129.886	151.532	26.6108	29.7849	28.6021	-1.72562
KLHL23	4.38896	3.18001	3.47495	9.38903	8.67567	5.26318	1.10033	1.16384	1.07982	-1.72361
AMPH	3.7646	3.83573	4.09834	4.62744	3.14252	2.07696	1.12076	1.03987	1.38288	-1.72309
LPAR6	1.1952	1.27577	1.2775	2.93828	2.63393	3.35922	0.561828	0.330141	0.245048	-1.72105
LINC00672	1.25155	0.97158	0.792729	0.647749	0.501475	0.260563	0.39221	0.138282	0.384901	-1.7201
ZNF107	10.9265	8.48225	6.84719	11.3102	12.8547	10.3383	2.62275	2.77412	2.57387	-1.71986
PRPF40B	6.08536	6.0888	6.80953	6.99893	6.71886	7.56774	1.62733	2.03203	2.10716	-1.71899
NR1H3	10.8374	14.134	12.15	30.5129	23.6225	27.725	3.91245	3.64014	3.73289	-1.71778
GNRH1	2.09923	1.62964	1.49585	1.62971	2.52338	2.88448	0	1.15971	0.430398	-1.71623
HVCN1	0.75837	0.735904	1.44105	1.76625	0.911597	1.61044	0.427784	0	0.466457	-1.71478
SATB1	2.41607	2.67241	2.08545	5.00181	4.80874	4.87619	0.807622	0.614156	0.76408	-1.71456
TGFB3	1.54845	1.48491	0.908671	4.52563	4.30658	4.73323	0.548052	0.28179	0.373499	-1.71189
MGMT	8.62398	8.49097	8.5933	15.2409	11.9116	11.8412	2.63666	3.03674	2.18502	-1.70992
GLUL	26.0847	24.7909	28.3004	30.1892	27.2219	32.0542	7.52435	8.06853	8.6913	-1.70505
CCDC109B	5.68465	4.03474	4.32077	2.12954	3.64439	4.05771	1.14013	1.48349	1.68721	-1.70352
FAM229A	3.35231	3.01331	2.01159	2.1916	1.13113	2.82108	0	1.55955	1.01288	-1.70334
FANCC	2.60916	2.63105	2.55562	3.50823	3.44889	3.22563	0.56646	0.879709	0.948565	-1.70284
LBR	11.7567	11.0441	11.6706	9.272	8.18105	9.51085	3.86387	3.37663	3.34894	-1.70277
MIS18BP1	5.7831	6.01263	5.49451	4.86377	4.51025	3.66359	2.0971	1.64306	1.58798	-1.69825
CARD16	13.3038	9.7695	14.6896	35.3579	33.1362	36.2911	3.24517	4.13167	4.27575	-1.69632
CA5B	19.2071	25.5048	18.969	19.8816	19.4424	27.0232	6.08248	7.37176	6.21784	-1.69471
IFITM2	114.94	102.254	123.951	254.453	233.97	243.767	37.2293	34.2982	33.8865	-1.69432
FANCG	5.08999	5.63183	5.1695	4.96592	2.25045	4.09261	1.5841	1.55141	1.77529	-1.69421
HSD17B11	10.4029	9.44713	10.8162	26.4125	21.7064	21.5109	3.05092	2.89158	3.54136	-1.6931
EPS8	22.4989	23.9739	24.9966	13.5138	13.8078	15.9273	7.72566	6.88285	7.50016	-1.69271
TRAPPC6A	1.53205	2.37866	2.03783	7.29489	8.59412	5.35853	0.921816	0.541678	0.376932	-1.6925
SORBS3	171.769	170.147	183.433	181.356	133.245	142.986	45.7329	53.5953	63.2499	-1.69214
LPAR1	91.692	83.8162	90.5636	181.891	194.241	202.067	28.1053	26.5863	27.754	-1.6903
ZSCAN12	1.3242	1.11509	1.21547	1.57978	1.83456	1.90645	0.270086	0.495963	0.368129	-1.68813
VMAC	1.25847	1.10438	1.50758	1.3593	1.22773	2.13248	0.411525	0.386913	0.403856	-1.6867
TGFB1I1	228.58	242.611	258.072	225.467	183.521	199.818	72.1989	77.6216	76.7843	-1.68626
SUOX	4.81339	4.06879	6.75816	7.52898	8.05745	7.1083	1.68943	1.4182	1.75444	-1.68563
MTMR9LP	1.97013	1.73333	1.37266	3.8067	4.31536	3.01881	0.395134	0.754614	0.430856	-1.68325
CAMK2D	47.5009	45.5738	45.7944	33.9528	37.0761	35.9448	14.823	13.9818	14.5009	-1.6811
FMN2	125.644	113.917	128.039	84.5434	82.033	77.2669	37.4717	38.8643	38.4033	-1.67978
RP11-861E21.2	3.41634	1.59126	1.62293	2.12178	0	0.682804	0	1.50987	0.560352	-1.67934
LRRC32	8.35489	8.37479	7.46446	21.6662	17.8072	16.3469	2.51352	2.43575	2.62055	-1.67633
SDPR	6.56944	6.76029	6.45934	10.4374	11.3249	10.9162	1.89595	2.26195	2.03603	-1.67578
GAS6-AS2	11.3094	10.3	12.0657	6.80158	6.7846	8.08171	3.99162	3.18326	3.368	-1.67542
DUT	74.7782	70.6701	74.3414	60.1283	47.9398	61.2982	22.8226	21.6493	24.3527	-1.67513
MUC1	3.67742	4.33505	2.45868	7.47212	7.74942	9.39148	0.819505	1.74565	0.726044	-1.66974
FAM127C	24.7147	25.7074	27.0671	22.432	21.9519	21.413	8.51577	7.42534	8.43695	-1.66841
RAB11FIP1	5.5817	4.86897	5.50928	6.77807	6.41707	8.10078	1.51308	1.79567	1.71457	-1.66774
PQLC3	34.707	43.38	28.6198	31.6327	35.6846	36.4285	10.5071	9.84008	13.2471	-1.66737
CEP126	1.52432	1.65939	1.81448	1.63226	2.19035	1.89098	0.395331	0.603991	0.574761	-1.66689
RP3-508I15.9	0.941449	0.487232	1.49078	0.649672	3.01778	1.41122	0.236025	0.554772	0.128681	-1.66682
HMCN1	1.43596	1.55642	1.40291	1.41627	1.70438	1.20484	0.631698	0.28738	0.466611	-1.66536
PPM1M	19.2202	19.8943	19.4785	24.5373	23.3604	29.6111	6.50509	6.22929	5.77963	-1.66211
SLC22A17	16.3314	16.9306	13.668	26.9205	22.0721	20.3108	5.31364	5.06825	4.45048	-1.66176
DIXDC1	22.3833	22.5447	21.9892	19.5593	23.5775	22.6849	6.67665	6.94991	7.59226	-1.65703
PYCR1	36.2344	39.2255	34.2367	33.7216	28.7706	29.3665	11.701	11.4595	11.6683	-1.65516
NICN1	2.92296	3.00106	2.95626	4.78239	3.24908	4.09878	0.638241	1.33349	0.850595	-1.65372
MYLK	89.198	89.6015	95.5095	106.59	121.69	120.726	31.2862	26.3426	29.7368	-1.65066
SYNGR1	16.5829	14.9134	18.08	36.0188	35.5825	33.0528	5.17971	5.36653	5.27641	-1.64766
OSR1	31.5969	33.9248	32.199	22.5516	20.1136	19.9893	9.29494	12.4441	9.45608	-1.64734
APOL6	1.40134	1.5703	1.34298	7.46715	7.94877	8.20748	0.421584	0.506234	0.449704	-1.64716
ANKDD1A	3.65668	4.129	4.10587	6.88197	4.26231	6.3118	1.00008	1.02842	1.77206	-1.64565
CDC14B	7.88217	8.0685	7.65419	9.98635	11.1983	11.0822	2.24414	2.32971	2.9976	-1.64044
STAT5A	0.831566	0.445204	0.817312	3.32434	2.11406	2.46435	0.301932	0.253459	0.117581	-1.6377
ZCCHC24	22.2509	24.338	22.4944	44.1494	41.5124	42.3979	7.78466	7.18206	7.31973	-1.63217
HAUS1	11.6204	15.8292	14.686	11.5746	13.1776	13.0367	4.94708	4.26361	4.40536	-1.62973
PIK3C2B	0.722072	0.896872	0.731774	1.52807	1.4659	1.4592	0.217231	0.226932	0.315827	-1.62905
FANCE	2.51102	3.37381	2.84451	3.19901	1.70267	2.21978	1.08956	0.981711	0.752438	-1.62828
HEG1	26.6838	25.096	27.131	47.6008	55.72	55.0946	8.89486	7.83424	8.81526	-1.62722
MIAT	1.79482	0.796184	0.974431	12.2087	10.2736	13.0677	0.385687	0.453275	0.315416	-1.62696
LINC00900	0.891004	1.21045	1.09345	1.53715	1.84455	1.2985	0.279223	0.360969	0.395805	-1.62475
APOBEC3F	8.43836	9.40614	6.37269	12.0942	12.1373	8.21641	3.25466	2.295	2.30678	-1.62408
OSR2	1.42372	1.38155	2.02901	15.474	9.98306	5.86886	0.535398	0.157305	0.875701	-1.624
UTRN	296.479	314.81	278.043	220.701	318.274	284.441	110.052	82.8373	95.7149	-1.62363
RCAN2	1.6248	1.56165	1.98478	2.96326	2.2321	3.20873	0.581918	0.683894	0.412442	-1.62354
GAREML	1.15594	1.10444	1.26722	1.77945	1.42512	1.30325	0.31209	0.445377	0.38892	-1.62159
PRKCA	116.711	121.983	123.463	105.193	120.561	104.969	41.9631	35.1004	40.6792	-1.62098
CHML	12.2842	10.686	11.7374	8.58525	9.32749	9.66397	4.29847	3.38836	3.61533	-1.61865
GPD2	167.415	181.404	177.305	104.144	110.97	126.219	55.3292	54.7454	61.4402	-1.61707
THRA	84.0596	85.03	80.4698	90.9664	75.8679	81.2449	26.8215	25.33	29.2463	-1.61632
SESN3	3.97254	4.35963	3.72512	7.47399	8.08826	7.61641	1.34305	1.2124	1.37957	-1.61547
AR	1.66645	1.56001	1.83941	1.6996	1.9246	1.49389	0.571384	0.519881	0.562746	-1.61484
FAM228B	2.12552	2.30239	1.92553	1.73966	1.90138	2.07468	0.892259	0.655387	0.527	-1.61467
HDAC6	46.7511	39.0847	37.5845	31.5319	33.5657	41.0116	13.0465	14.9589	12.3176	-1.6139
MAP1LC3A	28.362	32.6775	27.9221	30.5535	32.0871	27.445	10.4244	9.07493	9.57759	-1.61331
ABHD8	4.18967	4.4893	5.04583	8.42926	6.24204	6.30973	1.59774	1.82557	1.06467	-1.61265
VGLL3	24.8676	22.7017	21.9704	17.4306	19.0062	16.496	7.90225	7.10678	7.75109	-1.61133
NFYB	8.32266	7.63312	9.27527	11.0503	8.72381	9.75582	2.2714	2.85568	3.13914	-1.6099
JDP2	33.497	35.0657	37.7324	59.3648	50.6363	44.3788	11.4516	11.4396	11.9666	-1.60852
PRRT3	3.88152	4.264	3.0268	3.63878	4.34299	4.13504	0.991472	1.26232	1.41144	-1.60795
PHKA2	4.50368	4.34013	3.73089	2.52611	2.73793	3.0152	1.36826	1.43154	1.3282	-1.60701
MFSD6	47.4713	47.0372	45.5556	168.897	161.726	180.221	13.9944	16.0251	16.0421	-1.60445
AC106786.1	0.778598	0.24177	0.591794	1.61188	0	1.55614	0	0.275284	0.255413	-1.60304
PCDHGA3	1.18982	1.49207	1.86959	5.49485	6.30767	4.52741	0.481858	0.566299	0.450361	-1.6028
TIFA	1.21639	0.921252	1.26844	1.90401	1.61669	1.15627	0.267764	0.393358	0.462287	-1.60023
G6PD	79.0792	82.0222	83.5948	69.7742	59.4271	63.7076	27.0059	26.5177	27.2176	-1.59962
PCBP3	4.23523	5.52352	5.47247	38.228	28.5093	29.1186	2.54829	1.64717	0.8336	-1.59867
TRPV4	2.39291	1.8871	1.87654	1.49403	2.25242	1.6701	0.742748	0.637893	0.654146	-1.59724
CABLES2	3.94265	3.74364	3.68398	4.24973	3.65562	3.0608	1.51941	1.09445	1.14905	-1.59534
ARHGEF5	0.959766	0.745067	0.759892	0.993467	0.769123	0.799262	0	0.424174	0.393555	-1.59173
NUPR1	4.17763	3.55694	4.28924	10.7411	10.1154	7.94557	1.45277	1.23088	1.30781	-1.5909
HOXB3	25.0001	23.9353	23.112	23.9667	21.326	22.5815	7.27425	8.70443	7.95592	-1.58985
TSPY26P	2.73078	2.21851	2.92637	3.08962	3.76601	3.45876	0.764225	0.813946	1.04164	-1.58794
SLC38A2	291.546	270.418	274.959	261.171	283.071	276.245	95.8699	90.1451	92.4735	-1.58748
ZNF767P	2.2774	1.84954	1.59784	2.3211	1.68464	1.50556	0.421626	0.743268	0.747083	-1.58216
PCDHGA2	1.73742	2.23389	1.57334	3.14725	3.1327	2.84852	0.816709	0.479915	0.55659	-1.58107
SCARNA9	8.38503	1.62733	1.65971	2.89316	1.67987	2.09484	0	2.47054	1.43263	-1.58034
ZC3H12B	1.3678	0.707882	1.29954	2.04509	1.58327	2.96155	0.228608	0.403004	0.498551	-1.57845
RBMXL1	3.57217	3.31174	3.17416	3.5646	3.2951	3.2102	1.04374	1.09035	1.24348	-1.57429
COPZ2	55.1186	55.964	58.3573	50.5288	41.9681	48.4585	18.7217	18.8593	19.3538	-1.57339
CEP70	4.10799	3.43434	3.34541	2.89713	3.68993	4.55632	0.746951	1.39657	1.51789	-1.57223
TEK	3.89023	4.39271	3.87937	24.6935	26.7435	28.2091	1.59594	1.36408	1.13378	-1.57091
SCMH1	7.60691	9.06252	8.05021	10.9145	9.6569	9.74679	2.26584	3.12891	2.93393	-1.5695
TAF9B	13.0012	12.5632	11.791	9.03458	10.5645	9.94873	4.17119	4.62088	3.80267	-1.56849
PXYLP1	21.9301	20.9012	18.7728	21.1269	22.6201	27.1228	7.18546	5.75771	7.83506	-1.56796
TMEM59L	1.29292	1.5613	1.70611	3.12274	4.72001	3.51722	0.432185	0.634902	0.471257	-1.56776
KLF4	2.88611	4.64102	2.79105	13.0168	11.8946	12.3607	1.16286	1.09332	1.22573	-1.56724
SLC25A23	42.5622	43.9681	50.4682	64.5241	61.2331	57.2693	14.8715	17.7738	13.6049	-1.56663
CTTNBP2	2.33438	2.27726	1.94311	4.36227	3.84072	3.71596	0.559343	0.858223	0.796272	-1.56599
ALDH6A1	4.35097	4.00445	3.98468	4.31803	5.06832	4.88592	1.48439	1.28857	1.39787	-1.56495
PRRT1	1.17802	0.562769	0.602665	3.37677	1.74282	2.98833	0.408925	0.160195	0.222947	-1.56494
ZBTB12	3.815	4.49345	4.06208	5.03833	5.06022	5.52143	1.87989	1.27908	1.02492	-1.56399
ZNF766	2.60446	2.58431	2.32564	3.36482	3.16992	3.17019	0.854231	0.726982	0.963577	-1.56211
SMAD3	591.028	575.121	616.821	974.985	1048.18	1079.71	189.108	211.884	203.177	-1.56126
KIAA1522	2.47204	2.28877	2.32713	3.42744	2.36267	2.28905	0.682293	0.902091	0.818373	-1.56068
CDKL1	2.08445	2.91269	2.44253	5.0345	4.23169	4.58267	0.627095	1.04406	0.854734	-1.55844
LANCL1	13.7492	13.5371	14.4355	9.45238	12.5685	10.9042	4.3459	5.35829	4.46377	-1.55817
KLF12	9.5538	9.5048	9.87018	7.60898	9.45862	8.13376	3.62764	2.72608	3.47066	-1.55807
SLC2A1-AS1	1.42641	1.02215	1.14673	1.36292	2.63787	1.97369	0.660198	0.290959	0.269956	-1.55791
YPEL3	19.9098	26.3324	23.6452	41.981	28.9554	27.6337	6.65526	8.47333	8.61761	-1.55734
TAPBPL	1.99043	2.6149	1.81836	4.91307	4.90788	5.2022	0.690933	0.676677	0.81618	-1.55657
ZNF747	1.58386	1.6394	1.67202	2.18597	2.31286	2.11038	0.370607	0.746662	0.548438	-1.55526
B3GNT9	9.76661	9.38703	10.5647	15.0549	15.8565	14.0273	2.60752	4.18561	3.32869	-1.55388
CTGF	614.013	643.95	644.69	974.346	1021.2	987.128	215.972	209.636	222.524	-1.55365
POMZP3	2.54692	3.1939	1.76833	2.02797	2.19802	1.56627	0.884109	0.952453	0.723027	-1.55274
SCD5	12.8858	12.8437	12.4317	12.5149	13.0034	12.3604	3.29034	4.99187	4.72938	-1.55231
LIPE	0.905648	1.20524	0.891184	0.736567	0.673916	1.09897	0.340574	0.314487	0.371364	-1.54833
MAGI3	6.11762	5.28767	5.24308	4.63508	3.74001	4.53783	1.56533	2.14625	1.99132	-1.54561
SPEF2	1.34497	1.13902	0.851902	2.02502	1.43709	2.32156	0.245229	0.396279	0.501372	-1.5454
RP4-639F20.1	2.61897	2.5876	2.71449	2.95739	2.28955	1.66549	0.716276	0.631347	1.3668	-1.54504
CDCA7L	4.69627	5.58353	6.0698	3.76631	4.13638	4.18572	1.90925	1.79506	1.90837	-1.54249
PCDHGA11	4.00576	2.84614	3.48333	4.28698	5.22318	4.5119	1.17447	1.35028	1.03009	-1.53971
POT1-AS1	0.650245	0.673048	0.823728	0.897438	2.43173	1.94941	0	0.383173	0.355513	-1.5393
DPYSL3	24.2525	22.9028	23.925	46.3608	42.8168	43.063	8.00208	7.98755	8.47784	-1.53859
ANKRD28	19.484	19.3699	19.0829	20.7322	20.8686	20.9541	6.21777	6.75931	6.99561	-1.53645
ZNF469	9.90057	11.2764	10.0065	16.3818	17.7435	16.6692	3.68824	3.10315	3.97597	-1.53412
MANSC1	1.09984	0.886644	1.06505	5.21063	5.22044	4.77682	0.286338	0.336516	0.433646	-1.53024
TCF7L1	7.72889	7.54832	6.98788	16.7748	15.6507	16.1532	2.62522	2.49759	2.58993	-1.52947
AEBP1	6.46719	6.94422	5.51278	19.4572	17.0977	17.8482	2.182	2.03013	2.35448	-1.52701
KANSL1-AS1	1.43129	1.11112	0.226645	1.9754	0	1.66871	0.358831	0.210856	0.391271	-1.52685
PCIF1	9.74248	10.1074	8.78708	11.897	9.57022	10.7678	3.24163	3.84937	2.87193	-1.52323
IDNK	1.13983	0.825863	1.01075	0.943885	1.46148	1.97437	0.457216	0.268669	0.311594	-1.52051
ZNF674	1.27175	1.5044	1.06445	1.3791	1.50445	1.21037	0.364381	0.455	0.521486	-1.51817
COMMD4	30.399	31.0463	34.2631	22.9717	28.7142	25.8736	9.04106	11.6471	12.797	-1.51513
PCDHGB7	5.00405	4.46906	5.25921	13.2015	15.1886	14.4267	1.93176	1.87885	1.34374	-1.51512
CTD-2054N24.2	1.36528	0.706576	1.51333	1.88429	1.09408	0.909566	0.684559	0.20113	0.373223	-1.50987
PC	7.13732	10.1282	10.5728	13.346	12.7922	9.50997	2.77061	2.98479	4.02812	-1.50864
ERBB2	21.2842	23.4558	21.6647	27.706	26.688	27.3909	8.40085	7.37064	7.59843	-1.50663
LYRM9	1.53705	2.38642	1.11264	3.93967	2.58079	2.99887	0.770688	0.582263	0.420181	-1.50601
NID1	24.9303	22.5377	23.946	62.1319	45.8369	46.297	8.36397	7.69454	9.10142	-1.50508
NAALAD2	1.52051	0.786913	0.802571	1.04926	1.89541	1.6883	0.254131	0.149332	0.692764	-1.50436
DDX60	1.42202	1.3247	1.31246	3.19624	3.15821	4.34437	0.641711	0.323213	0.466483	-1.50375
ATP9A	13.9797	15.2424	15.5036	20.0151	20.5984	20.5327	5.26338	5.30625	5.22242	-1.50191
ACSF2	11.2375	10.8635	11.0796	10.5347	9.96819	12.925	3.72094	4.06064	3.94141	-1.501
C1QTNF2	0.86852	0.793215	0.970798	0.740367	0.573178	0.816876	0.23055	0.406427	0.293291	-1.50073
DISC1	2.4797	3.48678	2.4004	7.45816	5.84895	6.45219	0.985287	0.785751	1.18947	-1.49884
ALPK1	21.5016	13.8573	25.0539	45.3531	65.0213	58.3797	4.88199	7.88907	8.65043	-1.49579
[truncated: 1,969 more rows]
[truncated: 9 more columns]
