# Supplementary material for: BRD4 Connects Enhancer Remodeling to Senescence Immune Surveillance
Source: Oxford University Press journal article supplement (doi:10.1158/2159-8290.cd-16-0217), 2016-04-21
Supplement: 21598290cd160217-sup-162675_1_supp_3432487_h51dft.xlsx [file 21598290cd160217-sup-162675_1_supp_3432487_h51dft.xlsx]

## Sheet: Table S2
A. BRD4-gained TEs.
Gene Name	K27ac_proliferating Tag Count	K27ac_quiescent Tag Count	K27ac_senescent Tag Count	BRD4_proliferating Tag Count	BRD4_quiescent Tag Count	BRD4_senescent Tag Count	log2_K27ac_SP	log2_BRD4_SP
CHST15	1.68	2.7	53.13	0.01	9.42	21.87	4.98299	11.0947
TXNDC8	3.66	5.94	78.46	0.01	3.4	11.29	4.42204	10.1408
RNU6-19P	4.42	2.7	44.14	0.01	4.53	11.29	3.31997	10.1408
LOC100130744	6.09	4.27	43.32	0.01	1.89	9.18	2.83052	9.84235
MRPL15	2.29	3.82	44.14	0.01	3.4	8.47	4.26867	9.72622
LOC101927364	3.66	0.57	42.51	0.01	3.77	8.47	3.53789	9.72622
MATN1-AS1	5.33	2.7	61.3	0.01	10.17	8.47	3.52368	9.72622
EFTUD1P1	1.68	1.47	41.69	0.01	1.52	4.95	4.63317	8.95128
C15orf39	1.99	0.79	40.87	0.01	2.27	4.95	4.3602	8.95128
LOC101927273	3.35	1.35	40.87	0.01	3.02	2.83	3.60881	8.14466
PMS2P9	6.24	4.04	50.68	0.01	0.76	2.13	3.0218	7.73471
LOC102546299	2.44	2.7	44.14	0.01	4.15	1.42	4.17713	7.14975
MUTYH	1.99	0.91	40.87	0.01	3.4	0.72	4.3602	6.16993
GPR137B	1.68	2.25	40.05	0.8	3.4	17.64	4.57527	4.46271
DLK1	5.48	3.82	42.51	0.8	7.16	16.23	2.95555	4.34252
DCDC1	4.88	6.62	64.57	0.8	6.41	15.52	3.72591	4.27798
LOC100130539	4.12	2.47	50.68	0.8	6.41	13.41	3.6207	4.06717
LOC101927950	6.4	4.04	72.74	1.58	8.67	20.46	3.50661	3.69481
MIR595	9.59	7.29	66.2	1.58	9.42	19.05	2.78723	3.59179
CHRNB4	2.75	1.69	60.48	0.8	10.17	9.18	4.45895	3.52042
MIR122	4.27	4.94	62.12	0.8	7.16	9.18	3.86275	3.52042
RIMS3	4.72	2.81	68.66	0.8	3.02	9.18	3.86261	3.52042
PLXNA1	3.81	4.38	51.49	0.8	3.4	9.18	3.75643	3.52042
IGF2	5.33	5.72	55.58	0.8	8.67	9.18	3.38236	3.52042
EMX2	7	3.03	67.84	0.8	4.53	9.18	3.27671	3.52042
TNFSF14	0.92	1.58	51.49	0.8	4.53	8.47	5.80651	3.40429
GREB1L	2.44	2.7	53.13	0.8	6.03	8.47	4.44457	3.40429
KLK4	4.12	3.03	55.58	0.8	4.9	8.47	3.75385	3.40429
SNX10	2.75	1.13	55.58	1.58	15.45	16.23	4.33706	3.36067
TNFSF14	1.53	1.24	80.91	1.58	8.67	15.52	5.72471	3.29613
BMP2	3.66	2.03	44.96	0.8	5.28	7.77	3.61873	3.27984
ST8SIA4	5.64	7.62	64.57	0.8	4.53	7.77	3.5171	3.27984
IL1RN	12.48	5.94	51.49	0.8	2.65	7.77	2.04467	3.27984
LOC101927416	2.75	3.71	84.18	2.37	7.16	22.57	4.93597	3.25145
GPR55	22.82	10.54	52.31	3.16	20.72	29.62	1.19679	3.22858
OTC	7.92	8.97	170.81	1.58	3.4	14.11	4.43075	3.15872
ROR2	10.65	8.52	42.51	0.8	4.9	7.06	1.99695	3.1416
TRPC7	29.81	12.66	62.94	1.58	7.92	13.41	1.07818	3.08531
STON2	18.41	25.99	122.59	3.16	5.66	26.8	2.73528	3.08424
SCN5A	8.98	17.25	90.72	3.94	16.95	32.44	3.33663	3.04151
LINC01163	2.44	1.24	73.56	4.73	31.26	38.79	4.91397	3.03577
DPH3P1	14.61	20.39	58.85	6.3	26.74	50.77	2.01009	3.01055
KY	4.88	1.58	44.96	1.58	3.77	12.7	3.20369	3.00683
LOC101929454	5.03	4.94	40.05	0.8	4.53	6.36	2.99317	2.99095
TMEM233	3.35	2.25	130.76	3.94	13.56	30.33	5.28662	2.94448
GATA5	14.3	11.43	307.28	7.88	26.36	60.64	4.42547	2.944
BUD13	2.75	1.02	40.87	1.58	7.92	12	3.89354	2.92504
MIR6718	8.37	9.42	68.66	1.58	8.29	12	3.03617	2.92504
HJURP	19.62	19.72	51.49	1.58	8.29	12	1.39197	2.92504
TNFSF14	2.29	0.68	84.18	2.37	12.43	17.64	5.20006	2.89589
PLIN4	16.43	9.3	57.21	3.16	16.57	23.28	1.79993	2.88109
CD209	0.77	0.91	44.96	1.58	6.41	11.29	5.86764	2.83705
OLIG3	3.51	3.93	44.14	1.58	8.67	11.29	3.65254	2.83705
SLC25A51P1	5.64	5.94	49.86	1.58	3.4	11.29	3.14412	2.83705
TMPRSS9	14.3	5.72	148.74	3.16	13.19	22.57	3.37871	2.83641
TSHZ3	48.21	59.02	107.06	3.16	19.21	22.57	1.15102	2.83641
LINC01504	1.38	0.91	41.69	0.8	2.65	5.65	4.91696	2.82018
ITPK1-AS1	3.81	2.7	57.21	2.37	10.17	16.23	3.9084	2.7757
ADAMTS18	3.35	1.13	172.44	7.09	16.57	47.95	5.68579	2.75767
SLC18A1	2.59	2.81	51.49	1.58	6.79	10.59	4.31327	2.74471
RNASE7	6.7	6.95	40.87	1.58	4.9	10.59	2.60881	2.74471
KCNS2	1.83	0.57	44.96	2.37	3.4	15.52	4.61873	2.71117
TLE3	12.63	9.64	110.33	4.73	19.59	30.33	3.1269	2.68083
GRIN2A	3.81	2.81	59.67	1.58	6.79	9.88	3.96914	2.64459
PTPRE	6.09	8.07	52.31	2.37	8.29	14.82	3.10257	2.64459
LINC00922	17.65	24.2	67.84	1.58	6.03	9.88	1.94247	2.64459
RAPGEF1	4.27	3.26	61.3	3.16	6.79	19.75	3.84358	2.64386
PREX1	4.12	4.38	56.4	0.8	9.8	4.95	3.77498	2.62936
MIR4251	2.44	2.25	49.86	5.52	8.29	33.15	4.35293	2.58627
LOC339166	5.33	4.04	108.7	3.94	16.57	23.28	4.35007	2.56282
LINC01250	14	18.6	43.32	3.16	7.92	18.34	1.62961	2.537
OMA1	5.33	4.27	57.21	3.94	14.69	22.57	3.42406	2.51814
MIR4718	8.07	10.54	81.73	3.16	9.05	17.64	3.34023	2.48085
PILRA	19.32	22.97	48.23	3.16	7.16	17.64	1.31984	2.48085
OPCML	7.31	5.5	62.94	11.02	38.03	60.64	3.10603	2.46015
ICOSLG	5.18	4.49	61.3	5.52	13.19	30.33	3.56486	2.45801
MIR629	5.94	3.93	146.29	6.3	10.17	33.85	4.62222	2.42573
CD300LB	27.23	25.32	163.45	7.09	22.6	38.08	2.58558	2.42518
HIVEP3	19.17	21.29	130.76	3.94	12.81	21.16	2.77	2.42507
MIR6855	2.44	2.03	59.67	5.52	16.2	29.62	4.61205	2.42383
FTHL17	1.23	1.24	57.21	1.58	6.03	8.47	5.53954	2.42244
ADAM20	3.05	1.13	44.14	1.58	5.66	8.47	3.85521	2.42244
KCNK3	7	2.36	49.04	1.58	6.41	8.47	2.80853	2.42244
IGFBP3	13.85	6.84	43.32	1.58	7.92	8.47	1.64515	2.42244
MITF	11.87	12.22	44.14	2.37	10.93	12.7	1.89477	2.42187
RAPGEF1	8.98	3.59	58.85	3.16	10.17	16.93	2.71226	2.42159
DAB2IP	10.35	14.79	49.86	3.16	14.32	16.93	2.26825	2.42159
CYP26B1	11.41	8.74	114.42	11.81	39.92	62.76	3.32597	2.40984
PVRL1	30.72	17.14	65.39	10.23	35.78	54.3	1.08989	2.40815
MAB21L2	1.68	2.36	42.51	0.8	4.15	4.24	4.66127	2.40599
ST6GALNAC3	5.79	3.93	52.31	0.8	1.52	4.24	3.17545	2.40599
SSBP3	5.03	4.49	95.62	6.3	13.94	33.15	4.24868	2.39559
BCOR	14	8.3	143.84	2.37	7.54	12	3.36097	2.34008
VWA5B1	10.8	8.74	85	3.94	14.69	19.75	2.97643	2.32559
KBTBD12	23.88	12.22	518.12	15.74	24.48	78.27	4.43941	2.31402
IVL	6.09	4.27	152.01	4.73	9.42	23.28	4.64158	2.29918
CALCRL	2.29	1.24	68.66	1.58	3.77	7.77	4.90605	2.29799
MOS	1.83	1.47	44.14	1.58	4.53	7.77	4.59217	2.29799
LOC101928035	4.12	6.5	47.41	1.58	2.65	7.77	3.52448	2.29799
UFM1	4.57	2.47	49.86	1.58	1.89	7.77	3.44762	2.29799
LINC00595	1.83	1.69	67.84	3.16	9.42	15.52	5.21222	2.29613
GPR132	22.82	16.69	85.82	14.95	44.43	72.63	1.91102	2.28042
LZTS1-AS1	28.9	29.68	152.83	4.73	9.8	22.57	2.40279	2.25449
SLCO2B1	3.81	5.38	42.51	2.37	14.69	11.29	3.47994	2.25209
LINC00581	5.48	2.47	57.21	2.37	4.15	11.29	3.38402	2.25209
FUT10	13.69	14.79	62.94	2.37	1.89	11.29	2.20085	2.25209
TSN	13.09	3.37	58.03	2.37	6.03	11.29	2.14833	2.25209
MYT1	1.38	1.13	57.21	3.16	7.92	14.82	5.37353	2.22955
COPS8	2.59	2.03	87.45	3.16	4.9	14.82	5.07743	2.22955
XYLB	13.24	5.72	123.41	3.16	7.54	14.82	3.22048	2.22955
OBP2A	9.89	5.72	76.83	26.75	101.28	124.8	2.95763	2.22201
RGPD4-AS1	0.92	1.8	77.65	3.94	11.68	18.34	6.39921	2.21873
MACROD2-AS1	2.59	3.26	109.52	3.94	6.41	18.34	5.4021	2.21873
PGBD5	4.88	2.47	85.82	3.94	12.81	18.34	4.13636	2.21873
NDRG4	13.85	7.4	279.5	7.88	6.03	36.67	4.33489	2.21833
KCNJ1	12.93	10.76	162.64	9.45	13.56	43.72	3.65289	2.20991
MIR4777	11.57	5.16	157.73	4.73	15.07	21.87	3.769	2.20904
SLC22A1	95.95	116.13	387.37	25.97	68.53	116.34	2.01336	2.16343
LOC101927364	12.93	11.32	115.24	6.3	20.34	28.21	3.15585	2.16278
LOC100130539	6.09	6.06	42.51	3.94	10.93	17.64	2.80329	2.16258
ARHGEF28	6.55	8.52	163.45	4.73	10.17	21.16	4.64121	2.16143
ZFP64	11.72	8.07	69.47	4.73	8.67	21.16	2.56742	2.16143
LINC00332	0.92	1.02	49.04	1.58	2.65	7.06	5.73618	2.15974
STIM2	4.42	7.62	51.49	1.58	7.92	7.06	3.54217	2.15974
PDE8B	8.52	6.06	96.44	2.37	5.28	10.59	3.50071	2.15974
PWP2	7.46	6.62	48.23	2.37	8.67	10.59	2.69268	2.15974
LOC101928708	10.5	5.94	56.4	3.16	15.45	14.11	2.42531	2.15872
PID1	5.03	7.18	52.31	0.8	6.79	3.54	3.37846	2.14568
ADORA2A	10.2	9.42	203.5	9.45	21.85	41.61	4.31839	2.13854
ZNF137P	9.59	11.1	56.4	21.25	45.56	93.08	2.55609	2.13101
CHEK2P2	13.39	2.7	129.13	71.58	157.75	313.05	3.2696	2.12876
FAM189A2	10.5	15.01	52.31	9.45	41.05	40.9	2.3167	2.11371
FBXO15	16.58	20.39	526.29	29.11	43.68	125.51	4.98834	2.10822
C7orf33	1.07	0.68	41.69	7.09	16.95	30.33	5.28402	2.09689
MATN1-AS1	9.44	7.96	154.46	7.09	15.82	30.33	4.0323	2.09689
LOC646938	34.98	19.05	70.29	7.09	13.56	30.33	1.00679	2.09689
EIF3M	2.59	1.35	74.38	3.16	5.66	13.41	4.84389	2.08531
LINC00595	7.92	5.72	97.26	3.16	11.68	13.41	3.61827	2.08531
OR56B4	3.35	2.92	50.68	5.52	12.81	23.28	3.91918	2.07635
MIR586	10.04	5.38	89.9	2.37	8.29	9.88	3.16256	2.05962
MFSD2A	8.68	11.77	70.29	2.37	11.68	9.88	3.01755	2.05962
LINC01452	10.5	8.3	58.03	2.37	6.79	9.88	2.46641	2.05962
KIR3DX1	7.46	4.49	374.29	22.03	41.05	91.67	5.64884	2.05698
CPAMD8	6.55	5.05	54.76	14.17	38.03	58.53	3.06356	2.04634
CMPK2	1.68	1.8	55.58	3.94	4.9	16.23	5.04803	2.0424
LINC00593	9.74	5.27	96.44	3.94	11.3	16.23	3.30764	2.0424
ZBTB7C	16.73	8.52	109.52	5.52	15.82	22.57	2.71069	2.03167
LINC00242	10.5	10.42	49.04	5.52	13.19	22.57	2.22357	2.03167
NEK6	66.91	49.17	267.24	40.12	130.27	163.58	1.99784	2.0276
CES1P1	4.12	3.26	152.01	10.23	21.47	41.61	5.20538	2.02412
DCAF4L2	25.1	19.49	207.58	10.23	18.08	41.61	3.04791	2.02412
KLHL29	20.54	19.38	64.57	13.38	30.88	54.3	1.65243	2.02087
KIF6	14.15	8.3	70.29	14.17	53.47	57.12	2.31252	2.01116
IL33	5.03	3.71	103.8	1.58	9.8	6.36	4.3671	2.0091
FAM69A	5.03	6.95	41.69	1.58	4.53	6.36	3.05107	2.0091
EMR2	6.85	2.59	72.74	3.16	8.29	12.7	3.40857	2.00683
CCND2	20.54	44.35	93.99	16.53	37.28	65.58	2.19407	1.98817
RRAGC	7.92	3.82	85.82	5.52	27.49	21.87	3.43774	1.98621
RAB44	4.42	3.37	71.11	3.94	6.79	15.52	4.00793	1.97786
FOXN2	17.04	10.54	147.11	6.3	7.54	24.69	3.1099	1.9705
MIR4718	6.7	3.26	396.36	11.81	10.17	45.84	5.88651	1.9566
LOC101927229	3.66	3.26	53.13	4.73	10.93	18.34	3.85961	1.95508
IL37	5.79	1.8	57.21	4.73	4.53	18.34	3.30463	1.95508
MXD4	27.53	33.49	78.46	28.32	71.54	109.29	1.51095	1.94827
LOC101929633	8.68	5.61	180.61	5.52	10.55	21.16	4.37904	1.9386
MIR4642	15.52	10.54	103.8	12.59	23.35	47.95	2.74161	1.92925
CACNA1D	3.51	1.58	49.86	3.16	6.79	12	3.82834	1.92504
FBXO15	2.59	2.36	66.2	3.94	10.93	14.82	4.67581	1.91128
PLA2G2C	3.2	0.91	83.37	4.73	13.19	17.64	4.70338	1.89894
ITGA2B	10.35	6.06	60.48	4.73	16.2	17.64	2.54683	1.89894
DNAJC27-AS1	22.51	25.2	132.4	7.88	22.22	28.92	2.55627	1.8758
CDH13	4.57	6.17	108.7	10.23	26.74	37.38	4.57201	1.86946
GHRHR	11.87	9.86	49.04	14.17	40.67	51.48	2.04664	1.86117
LOC102724163	16.43	14.34	156.1	21.25	66.27	76.86	3.24807	1.85477
LOC390705	7.46	1.91	65.39	42.48	85.09	153.01	3.13182	1.84877
SHANK2-AS1	5.79	5.38	80.91	9.45	24.1	33.85	3.80468	1.84077
TGFA	13.39	30.24	67.02	3.94	11.68	14.11	2.32344	1.84045
INPP5F	7.16	7.4	50.68	7.09	18.83	25.39	2.82339	1.8404
TRAPPC9	7.16	8.63	107.88	7.88	18.08	28.21	3.91332	1.83994
KIAA1671	2.9	3.59	127.5	5.52	9.8	19.75	5.4583	1.83911
IL12A-AS1	3.2	3.37	40.05	1.58	5.66	5.65	3.64566	1.83833
LOC100506274	1.07	0.68	62.94	2.37	3.4	8.47	5.87829	1.83747
SYN3	2.44	0.91	80.91	2.37	6.41	8.47	5.05136	1.83747
HHAT	5.94	4.49	103.8	2.37	8.29	8.47	4.1272	1.83747
BMP2	4.12	6.84	110.33	3.16	9.8	11.29	4.74304	1.83705
EEFSEC	4.12	2.7	52.31	3.16	9.8	11.29	3.66637	1.83705
NRG1	9.44	6.62	55.58	3.16	9.05	11.29	2.55771	1.83705
FAM151A	3.2	2.92	43.32	0.8	5.28	2.83	3.75889	1.82273
SRPK2	9.59	6.95	73.56	0.8	3.02	2.83	2.93932	1.82273
MIR1227	76.94	62.05	229.65	46.41	125.38	162.88	1.57763	1.8113
CSF3	109.94	78.73	351.41	44.06	76.81	154.42	1.67644	1.80932
ZNF92	5.79	5.72	407.8	17.31	18.46	60.64	6.13815	1.80866
PNPLA1	21.75	33.49	250.08	7.88	8.67	27.51	3.5233	1.80369
MNX1-AS1	33.46	18.6	151.19	19.67	36.9	68.4	2.17585	1.798
RPH3A	8.98	7.74	74.38	5.52	13.94	19.05	3.05013	1.78705
MGMT	23.58	37.52	66.2	19.67	44.43	67.7	1.48927	1.78316
MIR3664	4.27	6.06	53.13	4.73	15.82	16.23	3.63722	1.77875
LINC00707	7.31	8.18	53.95	4.73	5.28	16.23	2.88368	1.77875
FAM201A	37.72	36.07	116.05	4.73	9.42	16.23	1.62134	1.77875
WNT4	2.44	3.03	47.41	3.94	7.92	13.41	4.28024	1.76704
SLC6A7	60.83	36.85	295.02	18.1	22.6	61.35	2.27796	1.76107
LOC101927822	23.88	19.61	130.76	7.09	11.3	23.98	2.45305	1.75797
PRG3	11.57	15.13	72.74	12.59	36.9	42.31	2.65236	1.74872
LINC00494	21.75	23.19	105.43	9.45	15.45	31.74	2.2772	1.74792
SPIN1	7.92	9.3	69.47	3.16	7.54	10.59	3.13282	1.74471
ACPP	11.72	14.79	70.29	3.16	8.29	10.59	2.58435	1.74471
GLI2	10.2	6.06	60.48	3.16	5.66	10.59	2.56789	1.74471
UNC45B	32.24	27.67	141.39	22.82	55.73	76.16	2.13276	1.73873
TSN	58.24	54.99	454.38	36.98	80.95	123.39	2.96382	1.73841
KIAA1045	18.71	16.13	226.38	14.17	27.87	47.25	3.59687	1.73747
NRARP	49.42	30.69	158.55	52.71	116.34	174.86	1.68177	1.73005
LINC00900	10.65	7.62	189.6	10.23	16.57	33.85	4.15403	1.72635
MDGA1	22.21	16.69	62.94	20.46	53.09	67.7	1.50277	1.72635
LINC00618	1.99	0.57	98.08	12.59	18.83	41.61	5.62312	1.72465
PSTPIP1	25.71	29.46	78.46	11.81	17.7	38.79	1.60963	1.71568
SHANK1	13.85	9.53	159.37	9.45	15.45	31.03	3.52442	1.71528
BRINP2	2.59	1.69	147.93	7.09	7.54	23.28	5.83582	1.71523
REN	12.63	7.85	126.68	4.73	5.28	15.52	3.32626	1.71422
HIF3A	9.89	9.86	87.45	4.73	7.92	15.52	3.14442	1.71422
LMF1-AS1	44.71	59.02	116.05	36.98	67.78	120.57	1.37608	1.70505
AGAP1	6.55	9.75	77.65	8.66	23.73	28.21	3.56742	1.70377
CYB561A3	8.07	6.62	125.86	6.3	14.69	20.46	3.96311	1.69938
MESDC1	36.04	28.12	74.38	6.3	9.42	20.46	1.04532	1.69938
PRSS41	4.27	4.38	51.49	10.23	28.25	33.15	3.59198	1.6962
CCDC174	74.81	33.6	172.44	19.67	38.03	63.46	1.20479	1.68985
SYT6	5.64	2.47	47.41	3.94	7.16	12.7	3.07142	1.68856
GJD4	20.84	13.22	70.29	3.94	8.67	12.7	1.75396	1.68856
YKT6	61.43	48.94	125.86	16.53	22.22	52.89	1.0348	1.67791
MYH16	17.34	6.28	103.8	5.52	10.17	17.64	2.58163	1.67611
GJA8	11.57	8.3	318.72	8.66	18.46	27.51	4.78383	1.66752
MIR4533	4.57	4.27	47.41	11.81	33.14	37.38	3.37493	1.66226
DIO3OS	27.38	33.16	57.21	25.18	49.33	79.68	1.06314	1.66194
PODXL	87.74	62.49	362.85	34.62	69.66	108.59	2.04807	1.64921
TRPV1	52.62	44.69	169.17	20.46	38.79	64.17	1.68479	1.64909
TRPV1	52.62	44.69	169.17	20.46	38.79	64.17	1.68479	1.64909
MIR4440	5.48	2.7	57.21	6.3	12.43	19.75	3.38402	1.64843
LOC101927847	5.18	2.47	114.42	7.88	12.81	24.69	4.46524	1.64766
OSTF1	5.18	6.06	54.76	4.73	4.15	14.82	3.4021	1.64763
KLKP1	20.08	14.79	149.56	4.73	3.77	14.82	2.89689	1.64763
DRGX	1.23	0.91	52.31	1.58	6.03	4.95	5.41036	1.6475
RPS6KA2-AS1	1.38	1.35	52.31	1.58	3.4	4.95	5.24435	1.6475
TANK	1.68	1.13	40.87	1.58	2.27	4.95	4.60451	1.6475
LOC100507468	4.27	2.36	52.31	1.58	2.27	4.95	3.61478	1.6475
LOC101928448	10.8	7.74	53.95	1.58	1.14	4.95	2.32059	1.6475
FXYD2	79.07	54.99	173.26	35.4	83.21	110.7	1.13174	1.64483
FAM46B	4.42	2.59	49.04	3.16	5.66	9.88	3.47184	1.64459
LINC01370	5.64	4.6	44.96	3.16	6.41	9.88	2.99487	1.64459
BRF1	36.04	34.16	72.74	41.7	87.35	129.74	1.01315	1.6375
CPLX2	5.79	2.92	131.58	11.81	26.74	36.67	4.50623	1.63459
VRK1	8.83	6.39	150.38	33.83	81.33	104.36	4.09006	1.62519
BEGAIN	6.85	5.5	69.47	7.09	16.95	21.87	3.34221	1.6251
MTG1	137.3	136.06	289.3	34.62	88.11	106.47	1.07523	1.62077
TSPY26P	59.15	52.42	138.94	9.45	11.3	28.92	1.23201	1.61368
KCNE2	2.75	1.58	40.05	3.94	6.03	12	3.8643	1.60677
CXCR4	7.61	9.64	85	3.94	6.79	12	3.48149	1.60677
OPRM1	5.48	4.49	54.76	3.94	7.54	12	3.32087	1.60677
OSBP2	29.35	12.78	58.85	3.94	4.9	12	1.00368	1.60677
SLC22A3	2.44	2.81	116.87	7.88	6.03	23.98	5.58188	1.60556
LINC01227	36.04	44.35	73.56	7.88	26.74	23.98	1.02932	1.60556
SLC2A6	27.23	29.24	154.46	14.17	26.74	43.02	2.50396	1.60217
THEG	12.02	24.42	68.66	20.46	27.12	62.05	2.51403	1.60063
GS1-279B7.1	41.97	27.11	528.75	18.89	21.47	57.12	3.65516	1.59637
GALNT9	17.65	20.84	69.47	6.3	15.82	19.05	1.97672	1.59637
PIK3R5	54.14	29.57	911.2	85.74	171.31	257.35	4.073	1.58569
PNOC	11.87	13.11	57.21	4.73	3.4	14.11	2.26895	1.57681
CYP1B1	3.96	6.17	47.41	2.37	8.67	7.06	3.58162	1.57478
TNFRSF21	6.55	5.5	64.57	2.37	10.17	7.06	3.3013	1.57478
MBOAT2	10.5	19.27	46.59	2.37	7.92	7.06	2.14963	1.57478
PCSK6	12.63	8.63	99.71	22.03	51.96	65.58	2.98088	1.57379
CHST11	12.63	9.86	278.68	10.23	12.06	30.33	4.46368	1.56794
KCNA5	26.47	50.62	54.76	7.88	16.2	23.28	1.04876	1.56282
GPAM	16.58	8.63	50.68	16.53	44.81	48.66	1.61197	1.55765
APOL6	14.61	19.27	338.34	8.66	12.81	25.39	4.53345	1.55182
CXCR4	14.91	13.56	552.45	30.68	55.73	89.55	5.21149	1.54539
LOC338694	56.42	51.07	128.31	40.12	88.11	117.05	1.18536	1.54473
SULT1C2P1	157.37	115.91	642.34	28.32	30.88	82.5	2.02918	1.54257
FBXO15	48.97	31.48	706.08	59.79	102.41	174.16	3.84986	1.54244
LINC01350	2.44	3.03	92.35	6.3	8.67	18.34	5.24216	1.54157
MIR3910-2	4.12	9.64	58.03	6.3	6.03	18.34	3.81608	1.54157
OR52K2	6.55	19.94	58.03	3.16	5.28	9.18	3.14723	1.53857
LRRC32	37.11	51.97	111.97	44.06	77.56	127.62	1.59323	1.53431
CCDC33	17.95	23.19	135.67	10.23	18.08	29.62	2.91805	1.53377
LOC100652824	12.02	18.93	182.25	7.09	16.57	20.46	3.92241	1.52895
LOC100507468	5.18	6.95	49.04	7.09	6.03	20.46	3.24293	1.52895
LINC01101	12.78	6.39	89.09	7.09	7.16	20.46	2.80138	1.52895
LOC101929331	20.54	22.97	53.13	7.09	10.17	20.46	1.37109	1.52895
LCP2	20.38	17.25	200.23	25.18	45.94	72.63	3.29643	1.52829
MIR218-2	28.29	20.61	414.34	43.27	81.71	124.8	3.87245	1.52818
GPR31	1.99	0.79	60.48	3.94	5.66	11.29	4.92562	1.51878
CXCR4	2.9	1.8	76.83	3.94	6.79	11.29	4.72754	1.51878
YWHAZ	4.27	5.72	82.55	3.94	10.17	11.29	4.27296	1.51878
PCDH9-AS2	3.66	3.26	52.31	3.94	3.02	11.29	3.83717	1.51878
ITGAM	4.72	5.05	53.13	3.94	5.66	11.29	3.49267	1.51878
VOPP1	8.22	3.26	53.13	3.94	11.3	11.29	2.69232	1.51878
SOX4	7.61	17.37	44.14	3.94	6.03	11.29	2.53612	1.51878
CHGB	15.67	11.66	240.27	7.88	18.08	22.57	3.93858	1.51814
PAPOLG	8.83	8.52	73.56	7.88	13.94	22.57	3.05844	1.51814
LOC101927421	20.99	17.37	59.67	12.59	34.27	35.97	1.5073	1.51452
C1QL3	64.93	34.39	245.99	33.83	62.13	96.6	1.92164	1.51372
KCNH6	18.71	9.98	104.61	8.66	15.45	24.69	2.48314	1.51149
RTN4RL2	30.72	27.44	76.83	22.03	43.3	62.76	1.32249	1.51038
FAM187B	2.9	1.69	59.67	4.73	3.02	13.41	4.36288	1.5034
LOC100133461	6.55	3.15	69.47	10.23	18.08	28.92	3.40682	1.49926
CNTD2	45.32	36.74	171.62	25.97	52.34	73.34	1.921	1.49775
LOC339166	139.58	50.85	647.24	78.66	117.47	222.1	2.21321	1.49751
BRINP2	18.26	12.1	415.97	22.03	36.53	62.05	4.50972	1.49396
LOC100506393	4.42	2.92	50.68	5.52	7.92	15.52	3.5193	1.49139
LINC01364	37.87	49.5	208.4	5.52	10.17	15.52	2.46023	1.49139
TMEM61	8.68	8.86	58.03	6.3	20.72	17.64	2.74103	1.48543
LOC149950	7.92	4.71	49.86	6.3	7.16	17.64	2.65431	1.48543
RB1CC1	29.81	23.53	278.68	13.38	24.86	37.38	3.22474	1.48219
VWA5B1	10.04	14.9	137.3	20.46	58.74	57.12	3.7735	1.48119
MAP3K8	26.92	17.7	171.62	7.09	8.29	19.75	2.67247	1.478
GBE1	10.8	10.65	59.67	7.09	14.69	19.75	2.46597	1.478
OCA2	14.76	7.62	72.74	7.09	10.17	19.75	2.30106	1.478
VAT1L	21.14	15.8	66.2	7.09	15.07	19.75	1.64686	1.478
NOL11	24.79	14.57	76.01	7.09	7.54	19.75	1.61643	1.478
VAC14	54.59	78.39	357.13	55.85	118.6	155.12	2.70974	1.47376
FLJ43681	98.99	119.71	208.4	48.77	102.41	135.38	1.074	1.47295
FECH	37.72	37.97	80.91	8.66	22.98	23.98	1.10099	1.46939
MIR3664	54.75	43.57	114.42	35.4	76.06	98.01	1.06341	1.46918
SNX29	85.61	37.97	496.06	37.76	48.2	104.36	2.53466	1.46664
MIR139	15.37	7.29	136.48	9.45	10.17	26.1	3.1505	1.46566
LINC00487	39.69	41.89	217.39	48.77	93.75	134.68	2.45344	1.46547
TBX21	31.63	32.48	72.74	49.56	85.09	136.79	1.20146	1.46471
LOC439933	11.87	14.46	218.21	13.38	23.35	36.67	4.20033	1.45452
KCNIP1	21.6	14.79	152.83	16.53	30.88	45.13	2.82282	1.449
CELSR1	27.83	31.14	76.01	33.04	66.27	88.85	1.44955	1.42716
TCF7L1	14.3	12.44	156.91	10.23	15.45	27.51	3.45585	1.42715
CEBPA	32.39	38.31	75.19	30.68	56.86	82.5	1.21499	1.4271
MIR670	34.07	24.65	341.6	35.4	64.39	95.19	3.32573	1.42706
SNX29	92.15	88.14	293.39	26.75	44.81	71.93	1.67076	1.42705
UBE2V2	82.87	93.62	359.58	40.12	68.53	107.88	2.11739	1.42703
BMP7-AS1	19.17	16.02	165.9	24.39	31.63	65.58	3.11339	1.42697
SERPINA1	10.04	10.65	97.26	8.66	22.22	23.28	3.27609	1.42665
CST4	21.45	14.12	127.5	25.97	50.83	69.81	2.57145	1.42659
ZNF556	2.29	1.91	49.04	3.94	8.29	10.59	4.42054	1.42644
SPATS1	8.52	6.95	122.59	3.94	8.29	10.59	3.84684	1.42644
GNRH1	18.1	13.34	63.75	3.94	7.16	10.59	1.81644	1.42644
LOC153910	19.02	37.97	41.69	3.94	12.43	10.59	1.13218	1.42644
TWIST2	12.17	7.51	254.16	18.89	29	50.77	4.38434	1.42635
PART1	14	8.63	138.12	7.09	12.81	19.05	3.30242	1.42593
ZNF354C	24.64	32.04	101.34	7.88	6.79	21.16	2.04013	1.42507
UBTF	6.55	6.84	81.73	4.73	3.02	12.7	3.6413	1.42492
LOC101927657	7.16	8.07	79.28	4.73	4.53	12.7	3.46893	1.42492
C3orf70	9.44	9.53	54.76	4.73	7.92	12.7	2.53626	1.42492
TEX10	17.19	13.78	64.57	4.73	12.43	12.7	1.90929	1.42492
BMPER	22.21	42.23	44.96	4.73	11.68	12.7	1.01743	1.42492
DOCK4	8.22	10.42	102.98	5.52	6.03	14.82	3.64708	1.42481
HUWE1	9.59	15.13	101.34	5.52	7.92	14.82	3.40153	1.42481
SRC	9.59	9.64	57.21	5.52	10.93	14.82	2.57666	1.42481
SOX17	0.01	0.35	51.49	2.37	1.89	6.36	12.3301	1.42414
MIR205HG	1.53	1.24	56.4	1.58	2.27	4.24	5.20409	1.42414
UGT8	1.53	1.91	45.77	2.37	6.79	6.36	4.9028	1.42414
FAM46A	2.59	3.82	44.14	1.58	2.27	4.24	4.09106	1.42414
PAPLN	5.18	6.06	79.28	2.37	4.53	6.36	3.93593	1.42414
NR5A2	8.07	12.66	44.14	1.58	4.9	4.24	2.45145	1.42414
LOC340113	16.58	18.71	64.57	2.37	7.16	6.36	1.96142	1.42414
LINC00648	2.29	2.7	72.74	3.16	6.41	8.47	4.98933	1.42244
PHACTR1	1.83	1.24	41.69	3.16	7.16	8.47	4.50979	1.42244
PSG2	4.88	6.17	53.95	3.16	2.65	8.47	3.46667	1.42244
POP4	16.43	10.09	165.09	38.55	76.43	102.95	3.32885	1.41714
ZNF337	26.77	25.65	62.94	33.04	61.75	88.14	1.23336	1.41558
NCOR2	39.84	39.31	84.18	27.54	49.7	73.34	1.07926	1.41307
C3orf56	2.9	3.26	55.58	0.8	3.4	2.13	4.26044	1.41278
TBX15	3.2	3.48	40.87	0.8	1.89	2.13	3.6749	1.41278
ANKFN1	6.09	5.38	49.86	0.8	3.02	2.13	3.03337	1.41278
BMP2	38.63	32.48	108.7	25.18	15.82	66.99	1.49256	1.41167
GAPVD1	69.65	83.88	152.83	40.91	91.49	108.59	1.13373	1.40837
SERPINA9	7.76	4.94	208.4	20.46	29	54.3	4.74715	1.40815
NTF3	21.45	27	152.01	18.89	40.67	50.07	2.82512	1.40632
LINC01391	32.7	28	256.61	14.17	21.85	37.38	2.97221	1.39943
LINC01105	53.38	50.51	128.31	12.59	26.36	33.15	1.26526	1.39673
NTM	10.2	6.17	345.69	35.4	46.69	93.08	5.08284	1.39472
LOC654342	7.31	2.92	74.38	11.81	19.59	31.03	3.34697	1.39365
LINC00936	12.78	10.2	527.93	34.62	29	90.96	5.36839	1.39363
RAD51AP2	7.31	17.03	161	11.02	28.62	28.92	4.46105	1.39194
NTSR1	114.35	71.56	299.11	85.74	143.45	224.22	1.38722	1.38687
SLC9A9-AS1	59.15	71.12	695.46	44.84	70.03	117.05	3.55552	1.38427
TSPAN11	33.46	59.02	210.85	35.4	65.52	92.37	2.65571	1.38368
SULT1C3	133.65	115.01	727.33	66.86	78.32	174.16	2.44415	1.3812
OLFML3	21.6	15.69	189.6	7.88	13.56	20.46	3.13386	1.37654
NOL4L	9.28	4.83	64.57	7.88	15.45	20.46	2.79867	1.37654
LOC101929517	16.43	11.54	63.75	7.88	7.54	20.46	1.95609	1.37654
LINC00900	16.43	15.24	159.37	14.95	22.22	38.79	3.27798	1.37554
MRPL3	3.35	3.37	67.84	7.09	15.07	18.34	4.3399	1.37114
CD70	11.72	20.5	71.92	7.09	10.55	18.34	2.61742	1.37114
NTM-IT	17.04	13.9	63.75	19.67	34.65	50.77	1.9035	1.36798
LRRC6	49.73	48.27	107.88	12.59	13.94	32.44	1.11724	1.3655
MIR3922	22.97	14.23	58.03	6.3	8.67	16.23	1.33705	1.36524
MIR3714	24.79	11.21	62.12	6.3	9.42	16.23	1.3253	1.36524
VKORC1L1	39.08	25.54	164.27	18.89	35.02	48.66	2.07157	1.36511
LINC00656	41.21	43.12	120.96	24.39	36.9	62.76	1.55346	1.36356
GYPA	5.03	5.72	150.38	17.31	29.38	44.43	4.90191	1.35993
ALLC	86.83	119.94	525.48	71.58	116.72	183.32	2.59737	1.35674
MYT1L	1.99	2.47	80.91	5.52	6.79	14.11	5.34548	1.35398
NOL10	15.37	9.98	98.89	5.52	5.66	14.11	2.68571	1.35398
CST1	11.26	10.98	70.29	5.52	11.68	14.11	2.64211	1.35398
KCNG4	39.08	31.81	81.73	21.25	38.03	54.3	1.06444	1.35349
TMCO5B	60.67	21.17	344.06	25.97	16.2	66.28	2.5036	1.35173
GALC	5.79	5.61	114.42	10.23	16.57	26.1	4.30463	1.35124
CYP26B1	86.67	87.46	387.37	64.51	91.49	164.29	2.16011	1.34865
SLC15A4	146.58	133.15	609.65	70.01	97.52	177.68	2.05629	1.34365
CHD9	14.45	14.9	196.14	9.45	13.19	23.98	3.76274	1.34345
TSN	3.51	2.25	80.91	4.73	10.17	12	4.52678	1.34312
BTBD11	3.96	9.64	83.37	4.73	9.42	12	4.39596	1.34312
FMN2	7.76	10.09	76.83	4.73	7.54	12	3.30754	1.34312
LOC101927543	15.82	15.91	85	4.73	6.79	12	2.42571	1.34312
CAMK2B	176.53	137.97	444.57	62.93	114.46	159.35	1.3325	1.34038
FOXD2	16.13	10.54	64.57	8.66	32.39	21.87	2.00112	1.33651
MORN5	59.76	52.75	378.38	67.65	115.21	170.63	2.66258	1.33471
STC1	152.2	110.42	525.48	116.42	151.73	293.31	1.78767	1.33309
TMEM174	34.98	73.02	71.11	29.11	51.59	73.34	1.02352	1.33309
LOC654342	37.72	28.56	257.43	86.53	156.25	217.17	2.77078	1.32755
LOC728175	19.17	14.79	178.16	11.81	20.34	29.62	3.21625	1.32656
TUBGCP3	22.97	15.57	116.05	11.81	19.21	29.62	2.33692	1.32656
MMP9	1.99	1.24	53.13	3.94	9.8	9.88	4.73869	1.32632
FOXI3	2.59	4.71	64.57	3.94	8.67	9.88	4.63984	1.32632
FTO-IT1	12.48	9.3	56.4	3.94	4.9	9.88	2.17608	1.32632
KCNIP1	21.3	14.79	62.12	3.94	5.66	9.88	1.5442	1.32632
LINC00581	9.74	13.22	187.97	7.88	11.68	19.75	4.27044	1.32559
MIR5008	67.52	58.69	154.46	65.29	138.55	163.58	1.19385	1.32506
RASGRF1	201.62	252.63	563.07	113.27	189.75	283.44	1.48168	1.32328
HLCS	23.73	9.53	62.12	11.02	13.94	27.51	1.38835	1.31983
BAIAP2L2	54.44	47.94	125.04	36.98	55.35	91.67	1.19965	1.3097
INHBA-AS1	28.9	30.58	581.87	46.41	53.85	114.93	4.33156	1.30825
LINC00659	129.7	76.49	297.48	55.85	87.73	138.2	1.19761	1.30713
B3GNT7	66.3	58.91	151.19	39.34	77.19	97.31	1.18928	1.30659
PDPN	85.61	114.56	178.98	54.28	117.47	133.97	1.06395	1.30342
SNX29	11.26	10.42	282.77	22.03	14.69	54.3	4.65035	1.30148
LINC00895	56.87	70.89	243.54	34.62	54.98	85.32	2.09842	1.30128
UBLCP1	11.72	9.08	154.46	6.3	5.66	15.52	3.72019	1.3007
LAMC3	10.65	10.87	58.03	6.3	8.29	15.52	2.44595	1.3007
LINC00867	4.88	4.49	71.11	8.66	5.66	21.16	3.8651	1.2889
CEACAM8	3.05	1.02	147.93	14.17	12.81	34.56	5.59996	1.28626
INHBA-AS1	9.44	22.41	44.96	5.52	12.06	13.41	2.25178	1.28057
FGF1	14.61	19.05	67.02	5.52	7.54	13.41	2.19764	1.28057
RHBDD1	7.92	4.6	102.16	7.88	8.67	19.05	3.68919	1.27352
FBLN2	15.06	26.88	82.55	10.23	12.81	24.69	2.45455	1.27112
SPHKAP	42.73	54.65	110.33	22.82	56.1	55	1.3685	1.26913
MIR548O2	94.73	118.48	219.84	22.82	31.26	55	1.21456	1.26913
THBS2	36.2	45.25	106.25	22.03	32.76	52.89	1.5534	1.26353
TRPV3	75.57	50.51	210.85	26.75	38.03	64.17	1.48033	1.26236
SNX29	11.72	9.42	265.6	11.81	10.17	28.21	4.50221	1.2562
LOC102724323	8.22	7.4	51.49	9.45	18.46	22.57	2.64708	1.25602
DAB1-AS1	2.14	0.57	59.67	7.09	7.92	16.93	4.80132	1.25572
SMIM21	4.27	3.37	127.5	4.73	8.67	11.29	4.90012	1.25513
LINC00942	4.42	4.15	72.74	4.73	6.79	11.29	4.04063	1.25513
DTNA	12.78	18.15	107.06	4.73	8.29	11.29	3.06646	1.25513
CYP26A1	25.71	15.01	103.8	4.73	7.92	11.29	2.0134	1.25513
RPL34-AS1	1.99	2.7	40.87	2.37	3.02	5.65	4.3602	1.25336
LINC01222	3.05	2.03	51.49	2.37	3.02	5.65	4.07741	1.25336
LMAN1L	2.59	1.8	40.87	2.37	3.02	5.65	3.98002	1.25336
SNORA70F	4.57	2.7	40.05	2.37	1.14	5.65	3.13154	1.25336
WBSCR17	38.17	46.37	92.35	27.54	43.68	65.58	1.27467	1.25173
ZNF440	46.99	42.67	129.95	18.1	27.12	43.02	1.46753	1.24902
LOC102724163	25.55	28	102.16	15.74	44.81	37.38	1.99944	1.24783
TBC1D22A-AS1	48.21	46.82	120.96	22.03	36.15	52.18	1.32713	1.24403
MIR8066	12.02	10.31	101.34	8.66	12.43	20.46	3.07569	1.24037
CHRD	45.93	36.07	236.18	21.25	34.27	50.07	2.36238	1.23648
SPP2	37.41	34.61	125.04	27.54	53.85	64.87	1.74089	1.23602
GPR39	13.85	29.46	74.38	6.3	10.17	14.82	2.42503	1.23412
LINC01248	21.75	19.05	259.88	18.89	19.59	44.43	3.57876	1.23391
TNP1	25.25	26.1	93.17	18.89	36.15	44.43	1.88358	1.23391
SCAF4	7.92	5.72	69.47	10.23	14.69	23.98	3.13282	1.22903
LINC00521	69.8	52.75	139.75	40.12	62.13	93.78	1.00155	1.22496
TNIP2	185.2	140.65	406.98	88.1	167.92	205.89	1.13587	1.22466
RAC2	268.67	261.7	708.53	170.69	278.98	398.36	1.39899	1.22269
SIX3	21.9	13.67	80.1	19.67	38.41	45.84	1.87087	1.22061
SALL1	3.51	3.03	98.89	3.94	9.05	9.18	4.81628	1.2203
DLGAP4	6.09	2.47	57.21	3.94	6.03	9.18	3.23175	1.2203
CCDC141	9.59	3.71	84.18	3.94	4.53	9.18	3.13387	1.2203
C10orf113	8.07	8.41	51.49	3.94	4.53	9.18	2.67365	1.2203
THBS2	6.7	11.54	40.05	3.94	5.28	9.18	2.57957	1.2203
TMEM72-AS1	48.82	97.99	159.37	15.74	43.68	36.67	1.70684	1.22016
CLDN10	15.82	15.24	87.45	7.88	12.43	18.34	2.46671	1.21873
DIO3OS	19.78	30.47	79.28	29.11	65.89	67.7	2.00291	1.21764
LOC101929528	78.31	84.22	256.61	44.06	86.22	102.24	1.71231	1.21442
COL13A1	64.78	47.04	134.85	36.19	51.21	83.91	1.05774	1.21325
PAPPA2	6.85	5.16	150.38	18.89	39.16	43.72	4.45636	1.21067
LINC01452	22.36	14.23	194.51	18.89	30.13	43.72	3.12085	1.21067
TLR10	10.35	10.42	83.37	9.45	6.79	21.87	3.0099	1.21057
SOCS1	159.81	112.21	441.3	89.67	132.53	207.3	1.4654	1.20902
MSRA	66.45	78.95	187.97	33.04	66.27	76.16	1.50016	1.20482
ZNF462	26.47	16.02	134.85	11.02	23.73	25.39	2.34893	1.20414
LRRC32	194.62	164.62	646.42	73.16	108.81	168.52	1.73181	1.20379
EBF1	5.94	5.83	80.1	5.52	10.55	12.7	3.75327	1.20209
DPYD-AS2	12.48	16.25	70.29	5.52	6.03	12.7	2.4937	1.20209
IL21R-AS1	10.8	3.82	42.51	5.52	3.4	12.7	1.97677	1.20209
PSMB2	24.03	10.54	69.47	5.52	5.66	12.7	1.53155	1.20209
CCND1	30.11	20.84	75.19	5.52	7.92	12.7	1.3203	1.20209
SYT6	28.9	19.72	71.11	5.52	12.06	12.7	1.29898	1.20209
GJB2	39.54	21.4	152.01	30.68	21.85	70.52	1.94278	1.20073
TMEM261	78.01	109.64	241.9	12.59	13.19	28.92	1.63268	1.19979
MIR6754	48.97	49.39	186.33	37.76	55.73	86.73	1.92789	1.19967
LRRC32	14.91	14.57	147.93	19.67	36.15	45.13	3.31056	1.19809
NANOS1	13.85	14.46	98.89	19.67	41.05	45.13	2.83594	1.19809
ADCK1	36.5	43.01	99.71	26.75	52.34	61.35	1.44984	1.19752
LOC400940	7.92	12.44	48.23	14.17	18.46	32.44	2.60636	1.19493
SHISA2	9.44	11.66	161	7.09	18.83	16.23	4.09213	1.19481
AURKC	11.87	9.53	120.96	7.09	20.72	16.23	3.34914	1.19481
LOC101928322	12.78	16.58	61.3	7.09	13.19	16.23	2.262	1.19481
MIR4462	20.23	10.98	92.35	7.09	18.08	16.23	2.19062	1.19481
ACKR3	16.43	11.21	48.23	7.09	9.42	16.23	1.5536	1.19481
ARHGEF33	7.61	8.52	87.45	8.66	14.32	19.75	3.52249	1.18941
STEAP1	22.51	17.93	137.3	8.66	14.32	19.75	2.60869	1.18941
OR9Q1	19.02	19.61	205.95	10.23	15.82	23.28	3.4367	1.18628
LOC401320	29.81	42.34	265.6	11.81	9.8	26.8	3.15539	1.18222
KLRG2	16.28	16.02	48.23	11.81	21.47	26.8	1.56683	1.18222
KIF16B	53.53	27.33	356.31	29.9	39.16	67.7	2.73471	1.17901
MIR3622B	27.83	27	56.4	14.95	26.74	33.85	1.01905	1.17901
TIAM2	53.22	43.01	113.6	16.53	25.23	37.38	1.09392	1.17718
CCDC68	35.89	27.89	503.41	18.1	21.85	40.9	3.81008	1.17611
RBM19	113.74	102.13	299.11	18.1	38.41	40.9	1.39494	1.17611
PC	37.72	40.21	76.83	18.1	28.62	40.9	1.02634	1.17611
PLA2G16	67.06	73.36	192.87	44.06	93.38	99.42	1.5241	1.17407
WNT7B	161.78	57.01	350.59	92.82	112.95	208.71	1.11575	1.16899
TBC1D22A-AS1	39.39	33.38	98.08	28.32	45.94	63.46	1.31613	1.16403
CYB5R2	2.75	10.98	111.15	1.58	8.67	3.54	5.33693	1.16382
LINC01030	1.68	1.8	51.49	1.58	6.79	3.54	4.93776	1.16382
FRMD4B	4.72	4.94	54.76	1.58	4.15	3.54	3.53626	1.16382
LINC00589	3.66	4.04	40.87	1.58	4.9	3.54	3.48113	1.16382
NRP2	6.7	6.17	62.12	1.58	4.9	3.54	3.21282	1.16382
ZNF83	4.88	5.27	43.32	1.58	1.89	3.54	3.15008	1.16382
PRR16	9.28	8.52	48.23	1.58	5.28	3.54	2.37773	1.16382
C4orf32	6.7	2.81	214.94	14.17	12.06	31.74	5.00363	1.16346
BMPR1B	22.66	24.2	345.69	18.89	27.49	42.31	3.93126	1.16338
AQP12A	3.81	1.91	67.84	6.3	12.43	14.11	4.15427	1.16329
ATXN10	8.52	6.73	67.02	6.3	9.05	14.11	2.97567	1.16329
BCL2L10	59	29.57	178.98	9.45	12.43	21.16	1.60101	1.16295
TM2D3	2.75	0.68	56.4	4.73	8.29	10.59	4.35819	1.16279
SOD2	5.33	7.96	102.16	4.73	8.29	10.59	4.26055	1.16279
TRPV1	13.09	10.42	55.58	4.73	1.52	10.59	2.0861	1.16279
TRPV1	13.09	10.42	55.58	4.73	1.52	10.59	2.0861	1.16279
ALK	7.16	2.59	79.28	7.88	8.67	17.64	3.46893	1.16258
MYCNOS	0.16	0.23	54.76	3.16	4.9	7.06	8.41891	1.15974
MSR1	2.44	1.58	40.05	3.16	5.66	7.06	4.03685	1.15974
GNAZ	3.35	2.92	40.87	3.16	6.41	7.06	3.60881	1.15974
MIR4312	9.28	5.94	46.59	3.16	8.67	7.06	2.32782	1.15974
2015-03-02	29.35	30.92	65.39	3.16	5.66	7.06	1.15571	1.15974
2015-03-02	29.35	30.92	65.39	3.16	5.66	7.06	1.15571	1.15974
ZFAT-AS1	69.19	48.61	223.11	33.04	61	73.34	1.68912	1.15039
RNU6-53P	25.55	37.86	93.17	16.53	25.61	36.67	1.86654	1.14951
GAL	25.1	11.99	81.73	29.9	50.83	66.28	1.70318	1.14843
CYP3A4	13.54	8.07	421.69	26.75	25.23	59.23	4.96088	1.14679
TSHZ3	40.91	60.59	143.84	38.55	101.66	85.32	1.81394	1.14615
TNP1	41.37	40.55	534.47	40.91	53.09	90.26	3.69145	1.14163
ANKRD30BP3	16.89	10.76	238.64	17.31	12.06	38.08	3.82059	1.13743
MIR8067	38.32	64.06	142.2	41.7	69.28	91.67	1.89175	1.1364
TNR	9.74	3.82	85	24.39	59.49	53.59	3.12547	1.13567
GPR12	86.22	86.34	205.95	14.17	16.57	31.03	1.2562	1.13082
PPFIBP2	5.64	8.07	88.27	7.09	8.67	15.52	3.96816	1.13027
MIR4533	21.9	10.87	85.82	7.09	15.82	15.52	1.97038	1.13027
TMCC3	16.89	11.1	404.53	25.18	20.72	55	4.58201	1.12715
SORBS2	19.93	11.32	364.49	22.03	18.46	47.95	4.19287	1.12206
ITGAX	6.24	3.48	77.65	11.02	18.08	23.98	3.63737	1.12171
DDX10	10.5	9.19	89.09	11.02	4.53	23.98	3.08487	1.12171
TMEM2	8.07	7.62	153.65	5.52	4.9	12	4.25094	1.12029
LOC100506271	16.43	17.14	61.3	5.52	7.16	12	1.89955	1.12029
SEMA6D	18.41	4.83	44.96	5.52	4.53	12	1.28815	1.12029
CRB2	16.43	21.29	61.3	25.97	48.2	56.41	1.89955	1.1191
NINJ2	32.24	33.27	71.11	14.95	25.61	32.44	1.1412	1.11763
ARHGEF16	45.47	23.19	112.79	9.45	7.92	20.46	1.31065	1.11442
PIK3R1	18.41	19.61	152.01	13.38	18.08	28.92	3.0456	1.11199
PREX1	17.19	8.3	85	13.38	24.48	28.92	2.30589	1.11199
MIR4718	37.26	29.12	169.17	17.31	28.62	37.38	2.18277	1.11066
BTBD3	30.11	35.28	66.2	17.31	21.85	37.38	1.13659	1.11066
NRROS	89.26	119.38	301.56	84.95	147.21	183.32	1.75636	1.10968
IL19	44.56	35.06	312.19	42.48	70.79	91.67	2.8086	1.10967
LINC00977	28.59	10.2	190.42	11.81	13.94	25.39	2.7356	1.10425
AGR2	3.66	7.29	58.85	3.94	4.15	8.47	4.00713	1.10417
TLR2	6.7	8.07	67.84	3.94	7.16	8.47	3.3399	1.10417
DNASE1L3	7.92	4.04	59.67	3.94	3.77	8.47	2.91343	1.10417
TMEM161B	10.96	11.54	47.41	3.94	8.29	8.47	2.11294	1.10417
LINC00290	16.13	12.66	65.39	3.94	8.29	8.47	2.01932	1.10417
MAMLD1	31.18	19.49	119.32	3.94	3.4	8.47	1.93614	1.10417
MTPN	19.02	17.93	53.13	3.94	6.79	8.47	1.48201	1.10417
MIR4718	76.18	84.22	498.51	53.49	69.28	114.93	2.71014	1.10341
PIN4P1	18.71	23.64	68.66	18.1	56.1	38.79	1.87566	1.0997
MIR936	24.79	19.94	59.67	18.1	29	38.79	1.26725	1.0997
LINC00460	119.06	132.37	854	65.29	68.53	139.61	2.84255	1.09647
UBE2I	262.59	203.7	566.34	60.57	93.75	129.03	1.10886	1.09103
MIR4777	34.37	35.84	79.28	31.47	42.93	66.99	1.20581	1.08997
NRSN1	15.97	13.45	212.49	12.59	15.45	26.8	3.73396	1.08995
OCA2	57.48	51.3	232.1	27.54	41.8	58.53	2.01361	1.08765
SLC4A1	71.77	28	311.37	21.25	22.22	45.13	2.11718	1.08662
IL37	6.55	5.16	198.59	14.95	15.45	31.74	4.92215	1.08616
ZNF644	4.12	3.26	195.32	17.31	21.47	36.67	5.56705	1.08299
NAB1	16.73	21.51	169.99	8.66	16.95	18.34	3.34494	1.08255
LINC01096	23.88	29.57	95.62	28.32	42.93	59.94	2.00151	1.0817
CDH5	85	124.19	241.09	19.67	12.81	41.61	1.50404	1.08093
MIR4743	195.38	125.09	862.99	88.1	82.08	186.14	2.14306	1.07917
TMEM200A	9.74	7.29	67.84	11.02	18.83	23.28	2.80014	1.07897
RIPK2	55.2	60.7	309.73	11.02	19.21	23.28	2.48827	1.07897
MIR205HG	32.24	67.76	193.69	29.11	32.76	61.35	2.58683	1.07555
MIR6772	187.93	120.39	379.2	76.3	103.16	160.76	1.01276	1.07515
NXT1	108.11	148.49	232.92	54.28	103.54	114.23	1.10733	1.07345
RPP25	21.75	15.35	154.46	34.62	51.21	72.63	2.82815	1.06896
FXYD5	50.34	44.13	131.58	34.62	50.83	72.63	1.38616	1.06896
CREB5	53.83	44.91	496.06	33.04	50.08	69.11	3.20403	1.06468
HTR3E	32.85	48.27	120.14	18.89	35.02	39.49	1.87075	1.06386
TNFSF11	6.7	10.76	116.87	7.09	7.16	14.82	4.1246	1.06369
LOC149373	4.57	4.49	53.95	7.09	6.03	14.82	3.56136	1.06369
EMX1	11.87	8.18	78.46	7.09	6.03	14.82	2.72464	1.06369
LOC101928944	9.44	11.1	48.23	7.09	11.3	14.82	2.35307	1.06369
GM2A	26.01	27.78	60.48	9.45	20.72	19.75	1.21739	1.06347
LINC00595	5.03	1.8	40.05	4.73	6.03	9.88	2.99317	1.06267
MGC27382	4.42	6.17	57.21	2.37	3.4	4.95	3.69415	1.06254
DMD	18.56	17.14	59.67	2.37	3.4	4.95	1.68481	1.06254
DNMT3A	97.77	102.13	237	70.01	120.48	145.96	1.27742	1.05994
ANO1-AS2	26.31	19.72	58.85	22.03	31.63	45.84	1.16143	1.05714
ARHGEF37	66.6	59.13	318.72	39.34	41.05	81.8	2.2587	1.0561
CWH43	6.7	4.27	162.64	12.59	9.42	26.1	4.60138	1.05177
TRIML1	15.82	15.46	86.63	12.59	19.96	26.1	2.45312	1.05177
TLE3	25.25	22.18	417.61	33.83	45.56	69.81	4.0478	1.04513
LOC101927637	92.45	56.11	383.28	47.2	63.63	97.31	2.05165	1.0438
GCNT2	6.09	11.88	49.04	7.88	21.09	16.23	3.00944	1.0424
GOLM1	8.37	13.67	44.14	7.88	10.17	16.23	2.39879	1.0424
PGBD5	6.7	4.49	84.18	29.11	48.58	59.94	3.65124	1.042
MIR548F5	21.14	9.86	144.66	22.03	38.41	45.13	2.77462	1.03462
RSU1	9.13	7.51	76.01	11.02	21.85	22.57	3.0575	1.03428
SH3BP4	18.86	17.14	147.93	11.02	19.59	22.57	2.97151	1.03428
CNTNAP5	16.28	26.32	109.52	11.02	15.45	22.57	2.75002	1.03428
PTPRG	29.35	25.65	156.91	11.02	17.33	22.57	2.4185	1.03428
C10orf90	0.77	0.57	63.75	5.52	5.66	11.29	6.37142	1.03231
PPP1R14C	4.57	8.52	67.02	5.52	2.65	11.29	3.87433	1.03231
DLEU7-AS1	6.7	17.93	93.99	5.52	6.03	11.29	3.81027	1.03231
TMEM163	7.46	2.92	93.17	5.52	7.54	11.29	3.64262	1.03231
TBXAS1	5.64	5.61	53.95	5.52	7.92	11.29	3.25786	1.03231
SEC16B	10.96	19.38	92.35	5.52	7.92	11.29	3.07486	1.03231
PPP1R26-AS1	9.89	9.53	43.32	5.52	9.05	11.29	2.13099	1.03231
MIR124-1	5.79	3.71	44.96	19.67	33.52	40.2	2.95701	1.0312
STEAP1B	37.56	42.67	627.63	36.98	32.76	75.45	4.06265	1.02878
VWCE	41.67	44.47	96.44	8.66	8.67	17.64	1.21062	1.02641
ATF1	27.23	36.18	99.71	11.81	13.94	23.98	1.87254	1.02182
MIR3182	159.35	69.21	871.16	98.33	135.16	199.54	2.45074	1.02097
NUDT7	48.21	42.23	530.38	99.9	155.12	202.36	3.45962	1.01837
NTNG1	34.07	37.41	124.23	21.25	41.05	43.02	1.86644	1.01754
TRIML1	156.92	102.47	540.19	97.54	143.82	197.42	1.78344	1.0172
MACROD2	37.41	15.24	353.05	15.74	21.85	31.74	3.23838	1.01187
KCNJ11	35.13	30.47	107.06	15.74	27.87	31.74	1.60764	1.01187
ADAR	53.68	44.24	138.94	25.18	42.18	50.77	1.37201	1.0117
C5orf15	8.68	12.66	119.32	18.89	30.88	38.08	3.781	1.01141
KCP	7.46	7.74	74.38	6.3	12.43	12.7	3.31767	1.0114
LINGO1	10.8	8.41	71.92	6.3	10.93	12.7	2.73536	1.0114
KRT7	50.94	48.05	102.98	9.45	11.68	19.05	1.01549	1.0114
TIAM1	1.23	4.83	40.87	3.16	5.28	6.36	5.05431	1.0091
LINC00332	1.68	1.13	45.77	3.16	3.02	6.36	4.76787	1.0091
JAZF1	1.83	1.58	48.23	3.16	5.66	6.36	4.72002	1.0091
ZNF518A	4.27	3.03	58.85	3.16	3.4	6.36	3.78473	1.0091
HNMT	5.48	5.83	67.02	3.16	3.77	6.36	3.61234	1.0091
PVRL3	6.4	6.28	40.05	3.16	4.9	6.36	2.64566	1.0091
B3GALT1	8.98	17.59	53.95	3.16	4.9	6.36	2.58684	1.0091
RCE1	16.28	11.77	75.19	3.16	3.77	6.36	2.20744	1.0091
C2orf82	14.91	11.99	50.68	3.16	4.9	6.36	1.76514	1.0091
ULK1	67.67	73.13	145.47	32.26	47.45	64.87	1.10413	1.00781
ZNF841	93.67	85.11	498.51	29.11	37.66	58.53	2.41196	1.00766
URAHP	46.08	43.57	101.34	45.63	58.74	91.67	1.13699	1.00647
FAIM3	13.69	8.74	102.98	19.67	27.12	39.49	2.91117	1.00549
NPNT	9.74	8.07	58.85	16.53	20.34	33.15	2.59505	1.00392
TDRP	55.2	56	112.79	16.53	19.59	33.15	1.0309	1.00392
VPREB1	24.03	30.92	78.46	13.38	19.21	26.8	1.70712	1.00215
NEIL2	143.23	141.89	439.67	94.39	158.88	188.96	1.61809	1.00137
SLC26A5	36.35	62.94	193.69	10.23	16.2	20.46	2.41372	1
PPY	59.15	46.14	169.17	65.29	110.32	130.44	1.51602	0.998452
KLHL34	26.92	31.59	501.78	35.4	39.16	70.52	4.2203	0.994283
MIR4277	20.54	9.86	65.39	14.17	24.86	28.21	1.67063	0.993367
FRMD3	1.68	2.14	66.2	7.09	13.56	14.11	5.3003	0.99286
ATP12A	4.72	7.51	102.16	7.09	8.67	14.11	4.4359	0.99286
PACSIN1	18.86	23.75	47.41	7.09	9.42	14.11	1.32986	0.99286
LINC00877	114.8	56.56	661.13	73.16	105.8	145.25	2.52581	0.989411
TMEM242	55.96	69.1	125.86	33.04	39.16	65.58	1.16935	0.989042
SPRED2	5.48	4.15	76.01	14.95	18.08	29.62	3.79394	0.986426
PTK2B	30.11	24.31	156.1	18.89	36.53	37.38	2.37416	0.984644
OLIG2	27.83	14.12	99.71	22.82	36.53	45.13	1.8411	0.983788
AXIN2	1.99	1.8	45.77	3.94	11.68	7.77	4.52356	0.979719
LYZL1	5.18	6.17	67.84	3.94	3.02	7.77	3.71111	0.979719
TMEM100	4.27	4.83	40.87	3.94	5.66	7.77	3.25873	0.979719
GGTLC2	19.47	11.77	59.67	3.94	7.16	7.77	1.61575	0.979719
LINC00881	21.45	31.48	45.77	3.94	7.54	7.77	1.09342	0.979719
AMER3	62.2	42.11	192.87	39.34	60.25	77.57	1.63264	0.979502
LOC101928398	14.61	13.9	135.67	15.74	19.21	31.03	3.21507	0.979228
PLS1	13.24	9.98	155.28	11.81	26.36	23.28	3.5519	0.979082
LOC101927280	10.35	16.25	97.26	11.81	19.59	23.28	3.23222	0.979082
GRIA1	5.94	8.86	41.69	7.88	11.3	15.52	2.81117	0.977861
SMARCA2	10.5	13	61.3	7.88	10.17	15.52	2.5455	0.977861
TMEM255B	66.45	37.52	379.2	76.3	109.56	150.19	2.51262	0.977034
MED27	11.72	13.34	75.19	12.59	21.47	24.69	2.68157	0.971649
AXIN2	20.54	12.78	67.02	21.25	36.53	41.61	1.70616	0.969467
DGAT2	59.76	56.33	179.8	43.27	76.43	84.62	1.58914	0.967632
KATNAL1	17.95	15.8	113.6	8.66	10.93	16.93	2.66191	0.967143
IQSEC2	18.1	11.88	58.03	8.66	8.67	16.93	1.68081	0.967143
ADRA1D	17.34	47.94	50.68	8.66	21.85	16.93	1.54731	0.967143
ANKRD30BL	135.94	102.36	366.12	471.92	571.5	921.51	1.42935	0.965458
CNIH3	39.39	45.47	192.87	48.77	75.68	95.19	2.29173	0.964816
LOC100507642	146.27	126.99	314.64	62.15	78.32	121.28	1.10507	0.964515
SHB	40.45	23.97	542.64	32.26	33.52	62.76	3.74578	0.960099
MIR493	60.83	42.56	145.47	32.26	45.19	62.76	1.25787	0.960099
MIR3182	11.57	9.08	168.36	14.17	13.19	27.51	3.86309	0.957116
KCNG1	22.06	11.66	188.79	14.17	21.09	27.51	3.09728	0.957116
LOC101928460	1.23	1.13	46.59	4.73	7.54	9.18	5.24329	0.956654
CNTNAP5	9.74	11.21	62.94	4.73	9.42	9.18	2.69198	0.956654
VPS8	8.07	10.31	45.77	4.73	8.29	9.18	2.50376	0.956654
ATF7IP	32.7	43.79	129.95	4.73	10.17	9.18	1.99059	0.956654
FAM178B	15.97	12.1	42.51	4.73	7.54	9.18	1.41244	0.956654
LOC101927637	20.69	11.88	45.77	4.73	9.42	9.18	1.14547	0.956654
CISTR	29.81	29.12	248.44	9.45	16.57	18.34	3.05903	0.956607
MIR4275	26.47	18.15	170.81	9.45	9.42	18.34	2.68996	0.956607
GPRC5B	20.69	7.96	55.58	9.45	8.29	18.34	1.42563	0.956607
MYLK-AS2	300.75	207.17	685.65	110.12	144.2	213.64	1.18891	0.956105
ADRA1D	37.87	56.11	86.63	34.62	48.58	66.99	1.19381	0.95234
RORA	9.13	6.73	89.09	10.23	11.68	19.75	3.28658	0.949047
MRGPRX3	10.65	4.71	92.35	30.68	33.89	59.23	3.11626	0.94903
ZNF354A	1.23	1.58	71.11	5.52	8.67	10.59	5.85332	0.939962
LOC728989	4.42	2.47	57.21	5.52	1.89	10.59	3.69415	0.939962
ADCYAP1R1	5.94	2.36	69.47	5.52	12.06	10.59	3.54786	0.939962
CTNNB1	14.3	9.08	40.05	5.52	9.05	10.59	1.48579	0.939962
SULT1C2	21.9	15.35	116.87	17.31	15.45	33.15	2.4159	0.937403
IGFBP3	32.85	20.5	163.45	17.31	25.61	33.15	2.31488	0.937403
LRRC37A11P	42.43	34.95	210.03	18.1	19.21	34.56	2.30744	0.933114
CHRM5	59.91	23.75	489.52	24.39	20.72	46.54	3.0305	0.932181
NDST2	91.69	79.07	254.16	36.98	45.19	70.52	1.4709	0.931287
ZNF92	104.46	88.25	541.82	37.76	33.89	71.93	2.37486	0.929735
SCN10A	3.66	1.69	85.82	6.3	7.16	12	4.5514	0.929611
MT1HL1	3.35	3.82	64.57	6.3	10.93	12	4.26863	0.929611
LOC283070	20.08	22.63	101.34	6.3	10.93	12	2.33537	0.929611
SLC25A3P1	65.54	65.52	213.3	56.64	81.71	107.88	1.70244	0.929534
WDR37	92.76	115.35	188.79	45.63	80.58	86.73	1.02521	0.926548
LOC101927421	95.19	121.39	800.06	62.93	69.66	119.16	3.07123	0.92108
IFNK	4.88	3.48	54.76	7.09	13.94	13.41	3.48817	0.919452
CLMN	4.12	6.17	40.05	7.09	17.7	13.41	3.28109	0.919452
AMMECR1L	17.34	17.48	107.88	7.09	9.05	13.41	2.63725	0.919452
TMEM154	18.71	27	62.94	7.09	11.68	13.41	1.75017	0.919452
DUSP10	212.11	167.98	768.19	107.76	90.36	203.77	1.85665	0.91912
CLEC4GP1	25.55	29.24	84.18	29.11	54.98	55	1.72015	0.917917
LINC00581	23.27	54.77	67.02	22.03	37.66	41.61	1.52612	0.917461
RANBP6	58.7	55.1	465.82	36.98	44.81	69.81	2.98834	0.916688
RXFP2	3.96	3.71	46.59	14.95	20.34	28.21	3.55645	0.916061
SHH	27.83	21.62	145.47	14.95	19.59	28.21	2.38601	0.916061
ICOSLG	136.54	127.55	423.33	59.79	77.56	112.82	1.63246	0.916047
ACSL5	90.47	84.33	716.71	68.44	107.31	129.03	2.98588	0.914795
KCNN3	76.94	74.7	371.84	78.66	137.05	148.07	2.27288	0.912577
SRD5A3	5.48	5.5	138.94	7.88	12.43	14.82	4.66414	0.911278
LOC101929122	28.14	52.98	104.61	7.88	14.32	14.82	1.89433	0.911278
KIF26B	131.53	155.88	541.82	90.46	121.99	169.93	2.04242	0.909589
CHGB	79.83	62.72	280.31	16.53	32.76	31.03	1.81202	0.908577
MIR7515HG	64.48	129.46	188.79	86.53	129.89	162.17	1.54986	0.906235
FOXN3	9.13	13.67	71.92	8.66	6.41	16.23	2.97771	0.906224
NECAB2	26.31	34.28	94.81	8.66	19.21	16.23	1.84943	0.906224
LOC101928988	74.81	107.84	330.16	74.73	100.53	139.61	2.14186	0.901643
FHOD3	27.83	72.57	90.72	9.45	20.34	17.64	1.70478	0.900464
ESRRG	46.53	24.2	308.92	18.89	29.75	35.26	2.731	0.90041
LINC00477	26.16	19.05	299.93	20.46	21.85	38.08	3.51919	0.896227
HAVCR2	17.19	16.58	69.47	20.46	22.98	38.08	2.01482	0.896227
LOC100506470	127.12	87.13	277.04	71.58	97.52	132.56	1.1239	0.889017
TYW1B	35.28	55.1	111.15	12.59	19.96	23.28	1.65559	0.886813
SLA	50.03	24.65	108.7	12.59	20.72	23.28	1.11949	0.886813
ADORA2A	162.09	117.47	614.55	51.13	48.95	94.49	1.92274	0.885992
LOC253573	17.65	36.51	151.19	13.38	22.22	24.69	3.09862	0.883849
PITX2	30.27	20.73	165.9	13.38	12.43	24.69	2.45435	0.883849
IRS2	56.27	67.2	230.46	43.27	51.96	79.68	2.03408	0.880851
MIR3663	3.81	1.47	44.14	15.74	19.21	28.92	3.53422	0.877632
PSG3	55.05	40.55	137.3	16.53	8.29	30.33	1.31852	0.875659
NEURL3	25.55	30.8	237.82	17.31	17.33	31.74	3.21847	0.874696
LCORL	25.25	16.02	159.37	17.31	15.82	31.74	2.65802	0.874696
FBXW11	40.61	38.42	101.34	36.19	53.85	66.28	1.3193	0.872982
RPLP0P2	178.96	156.22	374.29	123.49	204.06	225.63	1.06452	0.869565
SLC39A14	281.9	211.2	798.43	104.62	84.72	191.08	1.50198	0.869018
SLC24A2	79.53	27.89	623.54	46.41	46.69	84.62	2.97091	0.866563
UQCC2	51.55	31.92	152.01	23.61	17.33	43.02	1.56012	0.865609
KCNJ1	68.12	78.39	228.01	73.16	102.04	133.26	1.74295	0.865117
EGFL7	63.72	65.85	133.22	26.75	33.14	48.66	1.06399	0.863197
LCTL	60.98	105.04	141.39	62.15	83.21	112.82	1.21327	0.860197
LOC400958	1.99	2.47	204.31	10.23	10.55	18.34	6.68185	0.842187
SFRP2	4.57	3.71	158.55	12.59	15.07	22.57	5.1166	0.842128
LOC101929653	33.76	67.2	152.83	33.04	46.32	59.23	2.17854	0.842114
ANXA3	75.27	62.72	298.29	14.95	20.72	26.8	1.98657	0.842088
NOP56	16.58	23.97	63.75	19.67	34.65	35.26	1.94298	0.842036
LAMP3	16.13	16.58	59.67	20.46	36.9	36.67	1.88726	0.841794
SNX32	26.77	31.25	76.83	15.74	9.8	28.21	1.52105	0.841771
EPB41L1	13.54	15.24	57.21	13.38	24.48	23.98	2.07904	0.841754
MCTP2	32.7	33.6	78.46	11.02	15.07	19.75	1.26267	0.841728
ZNF432	7.92	6.84	117.69	8.66	7.92	15.52	3.89335	0.84169
KIF16B	6.85	7.74	97.26	8.66	8.29	15.52	3.82767	0.84169
SORCS1	6.4	3.82	63.75	6.3	4.9	11.29	3.31628	0.841622
AGAP1	11.57	11.43	68.66	6.3	13.56	11.29	2.56908	0.841622
PGF	17.49	13	79.28	21.25	35.78	38.08	2.18043	0.841571
RGMB-AS1	2.9	4.04	56.4	3.94	3.4	7.06	4.28157	0.841473
MIR7844	2.44	1.8	40.05	3.94	6.41	7.06	4.03685	0.841473
C1QTNF7	5.94	4.6	71.11	3.94	2.65	7.06	3.58152	0.841473
GALP	4.42	2.25	43.32	3.94	7.16	7.06	3.29291	0.841473
NRIP1	19.32	14.34	173.26	11.81	9.05	21.16	3.16477	0.841331
SAMD5	8.52	9.98	51.49	11.81	18.83	21.16	2.59537	0.841331
MIR3158-2	20.54	15.35	61.3	11.81	13.94	21.16	1.57745	0.841331
KIAA1217	29.66	32.37	84.18	11.81	14.32	21.16	1.50496	0.841331
ZBTB7C	2.29	2.25	158.55	9.45	8.67	16.93	6.11345	0.841196
DMD	19.47	22.74	122.59	9.45	6.03	16.93	2.65452	0.841196
MIR4275	3.35	2.47	54.76	7.09	7.92	12.7	4.03089	0.840971
EFTUD1P1	9.13	11.66	47.41	7.09	11.3	12.7	2.3765	0.840971
PSMG1	8.68	11.54	44.96	7.09	6.79	12.7	2.37288	0.840971
PPHLN1	16.28	24.76	62.12	7.09	4.53	12.7	1.93196	0.840971
CMAS	12.78	32.04	41.69	7.09	13.19	12.7	1.70581	0.840971
NRP2	2.44	2.25	42.51	1.58	3.02	2.83	4.12285	0.840877
MIR551B	6.4	5.05	71.11	4.73	2.65	8.47	3.47391	0.840522
FNTA	7.31	10.76	52.31	4.73	1.89	8.47	2.83914	0.840522
SLC26A4-AS1	9.74	3.03	67.02	4.73	3.77	8.47	2.7826	0.840522
MTRF1L	40.45	35.28	111.15	4.73	10.17	8.47	1.4583	0.840522
ACOXL	3.35	1.35	72.74	7.88	12.81	14.11	4.44052	0.84045
IFNG-AS1	18.86	34.05	80.1	7.88	11.3	14.11	2.08647	0.84045
LDB2	4.42	2.14	50.68	5.52	7.92	9.88	3.5193	0.839843
HGFAC	15.06	15.91	41.69	5.52	6.41	9.88	1.46898	0.839843
CPNE5	18.86	25.65	46.59	5.52	9.05	9.88	1.30469	0.839843
MIR4498	5.79	4.94	52.31	2.37	4.9	4.24	3.17545	0.839177
CCDC3	6.85	3.03	43.32	2.37	3.4	4.24	2.66086	0.839177
RIN2	7	7.29	44.14	2.37	6.79	4.24	2.65666	0.839177
DIO2	16.28	9.53	67.02	2.37	2.27	4.24	2.04149	0.839177
LOC101928453	310.78	295.29	949.61	156.53	204.81	279.92	1.61144	0.838575
SIPA1L2	3.05	0.91	58.03	3.16	3.4	5.65	4.24992	0.838326
GDPD5	4.27	3.15	45.77	3.16	7.92	5.65	3.42209	0.838326
NEURL1-AS1	170.45	194.07	409.43	135.29	214.6	241.84	1.26427	0.837998
LOC440600	97.92	105.94	312.19	62.15	103.16	110.7	1.67275	0.832829
KSR2	1.99	1.8	45.77	0.8	2.65	1.42	4.52356	0.827819
RAB44	4.72	5.94	43.32	0.8	1.89	1.42	3.19817	0.827819
TEX43	5.33	5.38	41.69	0.8	2.65	1.42	2.96749	0.827819
EPHA4	7.76	4.94	43.32	0.8	5.66	1.42	2.4809	0.827819
TOP3B	29.2	18.71	201.04	34.62	71.54	61.35	2.78344	0.825458
SLC1A1	27.68	24.09	93.99	32.26	51.59	57.12	1.76366	0.82425
PRSS22	238.56	237.96	786.99	147.09	159.26	259.47	1.72199	0.818869
ACSM4	26.16	18.82	234.55	23.61	32.39	41.61	3.16446	0.817532
LINC00605	71.47	91.61	210.85	42.48	68.91	74.75	1.56081	0.81529
TBC1D2	374.34	198.1	891.59	126.64	126.88	222.81	1.25203	0.815081
LINCR-0001	42.13	41.22	135.67	21.25	31.26	37.38	1.68718	0.814804
AFAP1-AS1	43.04	18.37	200.23	39.34	36.9	69.11	2.21791	0.812898
PTPRB	53.83	81.75	302.38	18.89	21.47	33.15	2.48988	0.811386
ETS1	116.32	118.37	838.47	51.92	38.79	90.96	2.84966	0.808942
MIR4790	137.61	87.8	831.93	117.2	109.19	205.18	2.59588	0.807918
IL7R	69.8	94.07	292.57	33.04	47.07	57.82	2.06748	0.807355
ATE1	59	50.96	217.39	33.04	54.22	57.82	1.8815	0.807355
ADAMTSL3	4.72	3.03	111.15	16.53	26.74	28.92	4.55758	0.806981
LOC100506474	54.44	90.94	116.05	16.53	24.86	28.92	1.09201	0.806981
DTNB	32.7	33.38	236.18	14.95	10.55	26.1	2.85252	0.803904
FGF1	249.81	212.21	764.1	86.53	121.99	150.89	1.61293	0.802225
ZNF233	25.1	18.26	145.47	14.17	26.74	24.69	2.53496	0.801087
RP1	39.84	35.95	420.06	40.91	60.25	71.22	3.39831	0.799829
LINC01370	10.8	15.24	87.45	13.38	23.73	23.28	3.01743	0.799013
MME	36.2	22.07	130.76	13.38	11.68	23.28	1.85286	0.799013
ZNF554	20.69	21.17	62.94	13.38	17.7	23.28	1.60504	0.799013
C10orf11	13.69	14.79	63.75	25.97	32.76	45.13	2.2193	0.797241
ZNF701	87.89	78.62	204.31	25.97	32.39	45.13	1.21699	0.797241
SERPIND1	92.91	107.73	193.69	25.97	26.36	45.13	1.05984	0.797241
PRSS2	9.13	9.08	53.95	12.59	15.45	21.87	2.56294	0.796675
ATP12A	44.1	65.29	109.52	25.18	22.6	43.72	1.31234	0.796015
SLC43A3	257.11	291.04	859.72	148.66	231.54	258.06	1.74148	0.79569
GAPVD1	12.93	8.74	71.92	35.4	48.95	61.35	2.47567	0.793314
FAM189A1	146.12	126.1	518.94	117.2	136.67	203.07	1.82841	0.793005
ZADH2	54.75	38.53	119.32	11.81	13.56	20.46	1.12391	0.792797
KLF13	20.38	15.91	44.14	11.81	11.3	20.46	1.11493	0.792797
GML	13.54	8.52	96.44	22.82	36.15	39.49	2.8324	0.791189
ACPP	42.73	62.94	516.49	33.83	39.16	58.53	3.59542	0.790873
LINC01396	61.74	64.4	152.83	78.66	129.52	136.09	1.30765	0.790859
PPAP2B	65.39	91.72	208.4	33.04	39.92	57.12	1.67221	0.789782
LINC01450	109.63	132.48	298.29	54.28	50.83	93.78	1.44407	0.78886
FAM183B	30.11	31.59	272.96	31.47	40.67	54.3	3.18037	0.786975
LOC101927950	128.94	116.91	264.79	62.15	85.47	107.18	1.03815	0.786209
DCSTAMP	5.33	5.61	62.12	10.23	9.8	17.64	3.54285	0.786044
CDH6	21.3	20.39	49.86	10.23	15.82	17.64	1.22703	0.786044
LOC101927701	49.42	83.43	98.89	10.23	16.95	17.64	1.00073	0.786044
LOC400661	40.45	46.93	139.75	29.9	53.47	51.48	1.78864	0.783867
SRSF5	78.16	66.3	421.69	48.77	56.48	83.91	2.43168	0.782849
MIR5691	40.76	48.72	103.8	47.99	74.93	82.5	1.34858	0.78166
SOWAHC	32.55	54.77	127.5	28.32	50.08	48.66	1.96977	0.780915
LINC00581	23.12	24.42	228.83	46.41	66.65	79.68	3.30706	0.779782
CELSR1	59	63.39	205.13	27.54	32.76	47.25	1.79775	0.778786
VOPP1	281.14	232.36	575.33	100.69	123.12	172.75	1.0331	0.778765
BTBD11	120.73	129.34	623.54	91.25	129.52	156.53	2.3687	0.778543
C15orf39	38.93	40.88	155.28	26.75	33.89	45.84	1.99592	0.777068
CDYL2	50.64	33.83	170.81	26.75	34.27	45.84	1.75404	0.777068
TBX3	72.38	70.11	380.83	79.45	128.76	136.09	2.39548	0.776442
LOC100505739	6.24	11.21	95.62	8.66	12.06	14.82	3.93769	0.775107
FGD2	13.69	5.83	147.93	8.66	11.68	14.82	3.43372	0.775107
SMPD3	7.92	5.61	44.96	8.66	5.28	14.82	2.50507	0.775107
SNORD56B	36.8	40.77	93.99	8.66	10.55	14.82	1.3528	0.775107
NCOR2	71.62	63.39	322.81	24.39	21.47	41.61	2.17225	0.770641
TNFSF15	59.61	76.15	411.89	70.8	65.14	120.57	2.78863	0.76805
LOC101928417	7.76	3.15	85.82	7.88	7.92	13.41	3.46719	0.767042
GUCY1A3	9.89	12.44	75.19	7.88	18.83	13.41	2.9265	0.767042
PPP4R2	25.55	35.95	62.12	7.88	6.03	13.41	1.28173	0.767042
OTUD6A	23.88	35.06	49.86	7.88	9.8	13.41	1.06208	0.767042
NRSN1	24.79	17.14	286.03	22.82	49.33	38.79	3.52834	0.765386
OTUB2	22.82	21.62	115.24	22.03	26.36	37.38	2.33627	0.762797
CRYL1	70.86	52.75	270.51	42.48	47.45	71.93	1.93264	0.75981
LOC101928909	19.78	17.37	118.51	7.09	13.19	12	2.58289	0.759177
LRRC37BP1	19.17	12.44	58.03	7.09	6.41	12	1.59795	0.759177
TNFRSF10A	69.49	67.2	173.26	27.54	32.76	46.54	1.31806	0.756943
ZSWIM5	24.49	21.06	425.78	20.46	32.01	34.56	4.11984	0.756297
NRON	39.54	59.58	156.1	33.83	35.78	57.12	1.98109	0.755693
WDR1	1.53	2.47	94.81	13.38	17.33	22.57	5.95344	0.754328
KIF3C	96.25	101.01	245.17	59.79	91.87	100.83	1.34892	0.753949
DLEU7-AS1	24.64	24.53	218.21	19.67	18.83	33.15	3.14664	0.753012
BMPER	44.86	75.37	125.86	39.34	62.51	66.28	1.48832	0.752577
C1orf145	64.63	79.96	179.8	51.92	65.14	87.44	1.47612	0.752003
LOC100631378	19.78	38.87	47.41	25.97	42.93	43.72	1.26115	0.751447
PSG9	99.9	95.53	212.49	25.97	11.3	43.72	1.08884	0.751447
LOC101927421	104.31	87.13	416.79	38.55	38.03	64.87	1.99844	0.750821
OXTR	18.41	5.61	54.76	6.3	6.03	10.59	1.57263	0.749279
HAO1	17.34	14.68	436.4	50.35	62.51	84.62	4.65348	0.749007
LINC01254	26.62	32.82	102.98	37.76	55.35	63.46	1.95178	0.748989
MIRLET7I	104.61	81.87	382.47	48.77	60.25	81.8	1.87033	0.746107
ATP2C1	11.41	6.84	73.56	18.1	30.5	30.33	2.68862	0.744756
KIRREL	121.95	121.62	413.52	41.7	47.45	69.81	1.76167	0.743386
RNF152	14.76	12.66	80.1	11.81	22.22	19.75	2.44011	0.741844
LOC101928891	29.2	27.44	65.39	11.81	13.94	19.75	1.1631	0.741844
ERRFI1	118.75	116.24	442.94	58.21	73.05	97.31	1.89918	0.741321
CD163	4.27	2.14	142.2	11.02	11.3	18.34	5.05754	0.734869
IGSF11-AS1	6.7	6.5	119.32	11.02	10.17	18.34	4.15453	0.734869
MIR548A1	15.67	14.12	88.27	11.02	10.17	18.34	2.49392	0.734869
SPATA31D1	28.14	43.23	111.15	16.53	19.59	27.51	1.98181	0.734869
MIR4276	3.2	6.39	62.12	5.52	8.67	9.18	4.27891	0.733826
KCNAB1	4.57	6.06	58.03	5.52	8.67	9.18	3.66653	0.733826
CDRT8	4.57	4.15	53.13	5.52	10.55	9.18	3.53926	0.733826
MYO5C	12.78	14.23	73.56	5.52	6.41	9.18	2.52503	0.733826
SLC26A7	18.86	30.24	79.28	5.52	8.67	9.18	2.07163	0.733826
LOC101927543	14	17.14	52.31	5.52	3.77	9.18	1.90166	0.733826
RNF175	11.11	15.69	40.05	5.52	6.79	9.18	1.84994	0.733826
LRRTM2	60.52	63.95	194.51	48.77	70.41	81.09	1.68436	0.73353
MIR1203	40.91	56.67	344.06	37.76	43.68	62.76	3.07213	0.732987
KCNAB1-AS2	62.65	74.7	170.81	42.48	50.83	70.52	1.44701	0.731249
TMEM39A	32.7	46.03	93.17	31.47	43.3	52.18	1.51057	0.72952
INSC	183.22	117.03	458.47	114.84	150.6	190.37	1.32325	0.729181
FNDC3A	79.98	55.33	277.04	25.97	34.65	43.02	1.79238	0.728162
GADL1	7.61	14.9	85	10.23	14.69	16.93	3.48149	0.726776
RNF5P1	33.31	35.28	148.74	10.23	10.17	16.93	2.15877	0.726776
DTX4	44.1	50.62	161.82	30.68	27.12	50.77	1.87554	0.726678
DESI2	32.09	45.81	71.11	25.18	34.65	41.61	1.14793	0.724652
DNER	6.09	6.17	95.62	14.95	13.19	24.69	3.9728	0.723781
ZNF468	43.19	70.89	158.55	14.95	25.61	24.69	1.87617	0.723781
SCARF1	66.91	58.35	201.86	44.84	48.95	74.04	1.59306	0.723519
LOC101927683	28.59	67.08	71.92	34.62	51.96	57.12	1.33088	0.72239
TSN	66.76	58.01	465	29.11	23.35	47.95	2.80017	0.720016
IPO8	71.62	64.28	313	29.11	32.39	47.95	2.12773	0.720016
SLC9A8	74.05	92.73	226.38	33.04	42.55	54.3	1.61217	0.716739
CNIH3	63.11	64.96	203.5	47.2	63.63	77.57	1.68909	0.716712
E2F7	73.14	73.69	320.36	37.76	43.68	62.05	2.13096	0.716572
C15orf53	2.9	3.82	98.89	4.73	4.15	7.77	5.0917	0.716074
PTGS2	4.57	8.07	86.63	4.73	11.3	7.77	4.2446	0.716074
LINC00299	3.35	2.47	53.13	4.73	7.16	7.77	3.98729	0.716074
LINC00353	11.72	5.83	108.7	4.73	6.41	7.77	3.21331	0.716074
C9orf57	7.46	20.28	88.27	9.45	7.16	15.52	3.56468	0.715742
SVOPL	19.78	41.22	40.05	9.45	10.17	15.52	1.01776	0.715742
LOC101929528	136.7	124.64	771.46	45.63	27.49	74.75	2.49658	0.712091
NEURL3	27.38	29.12	116.87	22.82	22.98	37.38	2.09371	0.711968
MBOAT4	24.94	16.81	58.03	18.1	17.7	29.62	1.21834	0.710582
BMP7-AS1	90.17	66.97	187.97	49.56	82.83	81.09	1.05978	0.710348
SLC24A5	69.04	76.04	583.5	62.93	70.41	102.95	3.07923	0.710124
APOBEC4	18.41	30.02	79.28	13.38	19.59	21.87	2.10647	0.708875
LOC100506393	64.02	72.68	137.3	35.4	44.06	57.82	1.10074	0.707819
LINC00838	34.52	42.23	254.98	22.03	21.09	35.97	2.88488	0.707325
MAPK13	262.74	153.08	735.5	82.6	62.88	134.68	1.48509	0.705322
IYD	62.2	73.24	620.27	60.57	68.91	98.72	3.31791	0.704739
ADAR	11.57	9.3	158.55	8.66	6.41	14.11	3.77648	0.704279
MIR5006	21.14	23.3	52.31	8.66	8.29	14.11	1.30711	0.704279
FAM84B	18.26	24.53	40.05	8.66	12.81	14.11	1.13312	0.704279
HYDIN	25.71	53.65	55.58	8.66	19.21	14.11	1.11224	0.704279
LINC00588	11.26	6.62	45.77	25.97	37.66	42.31	2.0232	0.704153
SSPN	129.4	107.96	485.43	38.55	24.86	62.76	1.90743	0.703114
TWIST2	80.59	134.49	253.35	38.55	59.12	62.76	1.65246	0.703114
WT1	21.14	30.47	87.45	29.9	56.1	48.66	2.04848	0.702591
ALDH1L1	60.52	102.02	175.71	51.13	74.93	83.21	1.53771	0.702587
LMO2	21.6	23.86	82.55	46.41	63.26	75.45	1.93424	0.701085
LOC647323	32.39	47.82	78.46	12.59	9.05	20.46	1.27641	0.700528
ZFAT-AS1	91.39	81.87	234.55	70.01	84.34	113.52	1.35979	0.697314
TMCO5A	32.7	44.69	77.65	16.53	12.43	26.8	1.2477	0.697146
FLJ43879	265.47	138.3	673.39	106.19	133.28	172.04	1.34289	0.696096
MIR30C2	114.95	142.22	561.43	28.32	27.49	45.84	2.2881	0.694786
MIR548F5	251.03	162.04	643.16	80.24	85.47	129.74	1.35732	0.69323
ELOF1	128.33	80.97	379.2	44.06	44.81	71.22	1.5631	0.692813
DAGLA	89.41	55.55	203.5	44.06	62.13	71.22	1.18652	0.692813
TRHR	1.99	1.35	66.2	3.94	6.79	6.36	5.05599	0.690831
LOC440416	1.68	1.13	42.51	3.94	4.53	6.36	4.66127	0.690831
MIR4774	17.95	13.11	53.95	3.94	3.4	6.36	1.58764	0.690831
ATP8A2	12.63	12.89	80.1	35.4	65.89	57.12	2.66495	0.690247
FAM201A	7.92	12.44	128.31	11.81	16.57	19.05	4.01799	0.689782
PEX5	9.74	7.74	60.48	11.81	12.06	19.05	2.63446	0.689782
PLXNA1	26.77	17.48	161.82	11.81	13.19	19.05	2.5957	0.689782
LY96	7.16	3.82	169.99	7.88	7.92	12.7	4.56935	0.688561
HCG2040054	7.31	6.95	152.83	7.88	10.93	12.7	4.38591	0.688561
PODXL	3.05	3.15	48.23	7.88	13.94	12.7	3.98305	0.688561
BATF	5.48	3.59	62.12	7.88	7.92	12.7	3.50281	0.688561
KCNC4-AS1	8.37	7.62	67.84	7.88	11.68	12.7	3.01884	0.688561
RGPD4-AS1	17.95	12.44	84.18	7.88	9.8	12.7	2.22949	0.688561
CLRN1	33.61	31.81	245.99	38.55	59.49	62.05	2.87164	0.6867
NGF	83.02	85	344.06	30.68	34.27	49.36	2.05113	0.686044
FA2H	145.51	118.71	743.67	95.18	98.65	153.01	2.35354	0.684896
MUC20	9.74	6.28	219.84	18.89	23.73	30.33	4.49639	0.683123
GRID2	4.72	4.71	75.19	18.89	24.1	30.33	3.99368	0.683123
LOC101929239	7.46	6.73	71.92	18.89	19.21	30.33	3.26915	0.683123
JARID2	36.04	22.74	118.51	25.97	26.74	41.61	1.71734	0.680084
FGGY	11.41	10.87	214.94	11.02	13.56	17.64	4.23556	0.678726
KLHL29	59.46	62.38	150.38	22.03	23.35	35.26	1.33862	0.678563
PRNP	36.5	24.09	83.37	22.03	41.05	35.26	1.19163	0.678563
ARNT2	136.7	167.08	334.25	94.39	115.21	150.89	1.28991	0.676791
APOOP5	23.27	9.42	505.86	36.19	17.33	57.82	4.4422	0.675978
LOC101929279	60.22	88.25	129.95	71.58	101.28	114.23	1.10964	0.674313
DRD3	71.62	57.12	414.34	39.34	30.13	62.76	2.53238	0.673848
BMPR1B	45.93	31.25	347.33	21.25	20.72	33.85	2.9188	0.671693
UTRN	39.24	42.9	113.6	21.25	18.46	33.85	1.53357	0.671693
IQGAP2	5.03	5.94	102.98	14.17	14.69	22.57	4.35566	0.671567
ACER3	17.95	11.43	88.27	14.17	17.7	22.57	2.29794	0.671567
LOC729506	4.57	4.27	76.83	7.09	6.03	11.29	4.0714	0.671188
LOC101928909	8.37	5.38	42.51	7.09	5.66	11.29	2.3445	0.671188
LINC00911	21.14	18.26	75.19	7.09	12.06	11.29	1.83057	0.671188
PAPSS1	21.45	56.33	44.96	7.09	8.67	11.29	1.06766	0.671188
POLR1A	55.51	52.3	129.95	48.77	73.05	77.57	1.22714	0.669505
CMPK2	139.58	120.16	850.73	92.82	51.59	147.37	2.60761	0.666935
B4GALT6	26.31	36.63	175.71	27.54	43.3	43.72	2.73951	0.666765
MIR3142	43.95	44.91	354.68	47.99	80.95	76.16	3.01258	0.6663
LOC101928944	6.7	5.83	124.23	10.23	12.43	16.23	4.21271	0.665857
MGLL	5.18	6.17	61.3	10.23	8.67	16.23	3.56486	0.665857
BEAN1	174.25	182.98	546.73	81.02	115.59	128.33	1.64967	0.663508
GS1-600G8.3	14.15	12.33	173.26	13.38	6.41	21.16	3.61406	0.661262
MIR4636	16.43	14.23	114.42	13.38	13.56	21.16	2.79993	0.661262
LINC01246	64.78	55.33	369.39	70.01	80.58	110.7	2.51152	0.661022
OLFML2B	14.91	14.01	150.38	33.04	32.39	52.18	3.33426	0.659283
H2AFY2	66	104.71	198.59	16.53	19.96	26.1	1.58926	0.658963
PRKG2	67.36	77.95	159.37	52.71	80.58	83.21	1.24242	0.65868
FBXL21	16.73	8.63	173.26	36.19	57.23	57.12	3.37243	0.658405
PRDM1	104.31	94.29	482.17	55.85	39.16	88.14	2.20866	0.65824
PYY2	20.99	15.24	138.12	19.67	22.22	31.03	2.71815	0.657667
PROKR2	29.96	16.47	143.02	39.34	68.91	62.05	2.25511	0.657434
DOCK2	82.72	58.13	352.23	45.63	51.59	71.93	2.09021	0.656611
ADAMTS12	275.36	288.91	938.17	114.06	145.71	179.8	1.76853	0.6566
LOC101927697	202.38	124.53	672.58	58.21	53.85	91.67	1.73264	0.655183
OPCML	60.07	52.86	384.92	38.55	45.94	60.64	2.67984	0.653539
KIAA0226L	156.61	226.32	641.52	107.76	138.93	169.22	2.03432	0.651078
LINC01476	17.8	13.9	324.44	28.32	25.23	44.43	4.188	0.649713
FBXO15	23.73	22.07	111.97	56.64	72.29	88.85	2.23833	0.649551
MIR7641-2	2.29	1.69	70.29	15.74	17.7	24.69	4.9399	0.649491
ILDR1	58.24	47.6	164.27	31.47	49.33	49.36	1.49599	0.649365
LINC00446	71.01	67.76	449.48	34.62	25.61	54.3	2.66216	0.649346
KSR2	0.92	1.13	49.04	6.3	8.67	9.88	5.73618	0.649159
IMMP2L	4.88	3.93	153.65	6.3	7.92	9.88	4.97662	0.649159
PHACTR1	4.12	16.36	53.13	6.3	11.3	9.88	3.68881	0.649159
DAD1	20.99	25.32	137.3	9.45	11.3	14.82	2.70956	0.649159
FARS2	8.98	5.16	43.32	6.3	7.16	9.88	2.27025	0.649159
SPATA3-AS1	21.14	22.74	100.53	6.3	12.06	9.88	2.24958	0.649159
MIR6773	18.1	28.9	69.47	6.3	7.16	9.88	1.9404	0.649159
AKR1C4	17.49	8.18	50.68	6.3	8.67	9.88	1.53489	0.649159
C11orf58	1.83	2.25	67.84	3.16	4.15	4.95	5.21222	0.647504
PNLIPRP3	3.05	1.8	76.83	3.16	6.03	4.95	4.65479	0.647504
JAKMIP2	3.05	3.93	52.31	3.16	11.3	4.95	4.10021	0.647504
LSAMP-AS1	8.52	8.41	65.39	3.16	5.66	4.95	2.94014	0.647504
MIR383	11.11	6.06	40.87	3.16	3.4	4.95	1.87918	0.647504
NEDD4L	27.53	26.1	84.18	36.98	47.45	57.82	1.61247	0.644823
LOC101929653	20.69	21.73	75.19	21.25	26.74	33.15	1.86161	0.641546
KRAS	56.42	79.85	175.71	33.04	44.43	51.48	1.63892	0.639798
C9orf57	18.86	24.53	120.96	14.95	22.98	23.28	2.68113	0.638946
C8A	29.96	32.48	140.57	44.84	55.73	69.81	2.23018	0.638647
STEAP3	28.9	21.96	174.08	26.75	35.4	41.61	2.59061	0.637391
KU-MEL-3	16.43	10.76	175.71	20.46	21.47	31.74	3.41879	0.633496
LINC01248	38.78	43.01	242.72	49.56	68.91	76.86	2.64591	0.633057
PIK3CG	7.16	13.45	128.31	8.66	7.54	13.41	4.16353	0.63087
RB1CC1	4.57	2.81	93.17	17.31	20.72	26.8	4.3496	0.630627
CLDN14	56.87	42.79	174.89	83.38	145.33	129.03	1.62071	0.629933
LOC102467655	54.44	77.83	383.28	57.43	71.16	88.85	2.81566	0.629567
NEK6	125.29	123.97	269.69	91.25	121.99	141.02	1.10603	0.628003
BEND7	74.97	76.49	256.61	59.79	88.48	92.37	1.77519	0.62752
SHISA3	48.82	59.58	149.56	33.83	41.05	52.18	1.61518	0.625194
DUSP4	59.76	68.2	165.9	59	70.79	90.96	1.47306	0.624517
MIR581	62.5	108.85	371.02	44.84	59.12	69.11	2.56957	0.624108
AFF3	43.19	59.13	255.8	25.18	24.1	38.79	2.56625	0.623406
MTUS2-AS1	26.92	18.93	144.66	25.18	27.49	38.79	2.42592	0.623406
GABBR2	67.82	62.61	152.01	41.7	52.34	64.17	1.16438	0.621852
MRAP	83.78	81.64	208.4	49.56	42.55	76.16	1.31468	0.619857
MYH16	82.11	51.3	425.78	33.04	35.02	50.77	2.37448	0.619763
GIMD1	23.12	23.97	300.74	38.55	49.7	59.23	3.7013	0.619597
UACA	9.59	6.73	79.28	11.02	13.19	16.93	3.04735	0.619458
FAM155A-IT1	15.21	17.59	57.21	11.02	13.94	16.93	1.91125	0.619458
DKFZp451B082	19.62	25.88	68.66	11.02	11.68	16.93	1.80714	0.619458
ERC1	54.59	53.76	182.25	11.02	13.19	16.93	1.73921	0.619458
CDH6	45.01	19.94	196.96	16.53	14.32	25.39	2.12959	0.619174
LHFPL5	20.23	14.57	87.45	16.53	19.96	25.39	2.11196	0.619174
FTCDNL1	136.7	197.09	585.13	73.94	72.67	113.52	2.09774	0.61852
PCED1B-AS1	78.92	98.89	164.27	57.43	65.52	88.14	1.05761	0.617992
SULF1	52.77	82.87	113.6	46.41	59.49	71.22	1.10617	0.617847
TTN	3.35	3.48	72.74	5.52	9.8	8.47	4.44052	0.617694
SEMA3C	5.48	8.74	97.26	5.52	7.16	8.47	4.1496	0.617694
PDGFC	5.33	3.03	46.59	5.52	1.89	8.47	3.12781	0.617694
FAM13A	10.04	11.77	61.3	5.52	3.02	8.47	2.61013	0.617694
SCEL	17.49	10.98	463.37	35.4	29.75	54.3	4.72756	0.617203
FAM136A	31.03	28	284.4	35.4	36.53	54.3	3.19619	0.617203
LINC01250	36.5	30.8	74.38	35.4	60.62	54.3	1.02702	0.617203
FKBP15	158.59	130.02	764.92	43.27	22.22	66.28	2.27001	0.615206
LINC00595	37.11	28.23	106.25	13.38	31.26	20.46	1.51758	0.612728
ALDH1B1	18.26	58.01	40.05	7.88	7.16	12	1.13312	0.606767
LINC00443	110.39	73.8	723.24	41.7	36.15	63.46	2.71186	0.6058
LOC101927901	152.51	170.22	602.3	103.83	136.67	157.94	1.98158	0.605153
SNORA70F	14	18.71	177.35	18.1	18.46	27.51	3.6631	0.603966
CNIH3	299.84	316.46	644.79	149.45	166.41	227.04	1.10464	0.603284
MED27	322.34	202.13	914.47	120.35	157.38	182.62	1.50435	0.601609
LOC101929567	5.79	4.38	125.04	10.23	14.69	15.52	4.43268	0.601322
ANKRD30A	22.06	11.32	182.25	10.23	7.92	15.52	3.04641	0.601322
PLA2R1	14.76	13.45	46.59	10.23	19.96	15.52	1.65833	0.601322
SMNDC1	26.62	13.22	141.39	20.46	19.21	31.03	2.4091	0.600858
CNGB1	40.45	71.79	127.5	20.46	31.26	31.03	1.65629	0.600858
LOC102724957	121.8	184.1	697.91	63.72	82.08	96.6	2.51853	0.600277
MIR575	40.45	34.39	366.94	43.27	43.68	65.58	3.18133	0.599889
UPB1	42.73	64.84	187.15	43.27	55.73	65.58	2.13087	0.599889
BDH1	388.78	245.58	779.63	180.12	152.48	272.87	1.00384	0.599255
LINC01488	49.58	64.96	121.77	35.4	38.41	53.59	1.29633	0.598214
LOC283585	32.09	15.69	111.97	12.59	8.67	19.05	1.80292	0.597513
LINC00368	108.87	124.3	409.43	75.52	77.56	114.23	1.91101	0.597011
MRAP2	3.96	3.26	88.27	14.95	13.56	22.57	4.47835	0.594261
MIR8053	27.83	37.3	120.96	14.95	11.3	22.57	2.11982	0.594261
RHOB	68.28	45.36	137.3	14.95	14.69	22.57	1.0078	0.594261
CYSTM1	141.56	98.1	290.94	34.62	17.7	52.18	1.03931	0.591891
MIR2117	107.81	78.62	264.79	46.41	42.18	69.81	1.29636	0.588998
SFRP1	179.12	169.32	359.58	117.2	146.08	176.27	1.00539	0.588814
FANK1	255.14	217.47	533.65	240.69	303.07	361.7	1.0646	0.587617
AKAP11	16.13	13.78	112.79	36.19	46.69	54.3	2.80582	0.585361
TLE1	59.15	66.52	392.27	45.63	44.81	68.4	2.7294	0.584014
TM4SF19	108.57	80.07	422.51	45.63	39.54	68.4	1.96036	0.584014
CCDC81	387.87	296.3	805.78	194.28	207.82	290.49	1.05481	0.580351
LOC101929237	35.13	14.57	89.9	28.32	35.02	42.31	1.35562	0.579177
MASP1	46.84	61.82	159.37	37.76	54.6	56.41	1.76657	0.579092
ZHX2	87.59	105.04	876.88	80.24	57.61	119.87	3.32354	0.579077
MIR4666A	4.27	6.06	84.18	2.37	8.67	3.54	4.30117	0.578862
COL19A1	2.75	2.36	44.14	2.37	2.65	3.54	4.00458	0.578862
SENP2	3.51	4.71	51.49	2.37	4.53	3.54	3.87475	0.578862
DTL	8.68	6.28	67.84	2.37	2.27	3.54	2.96637	0.578862
RALGAPB	6.55	5.94	46.59	2.37	3.02	3.54	2.83045	0.578862
C19orf68	9.89	9.19	46.59	2.37	4.53	3.54	2.23598	0.578862
SMARCA2	4.12	1.8	55.58	7.09	6.41	10.59	3.75385	0.578845
PCDH7	3.51	3.71	42.51	7.09	2.65	10.59	3.59826	0.578845
MIR6811	5.18	2.92	49.86	7.09	9.05	10.59	3.26686	0.578845
PABPC1P2	4.57	4.38	40.05	7.09	3.4	10.59	3.13154	0.578845
LINC01060	13.54	4.49	89.09	7.09	5.66	10.59	2.71804	0.578845
DMRT3	18.71	5.05	101.34	7.09	18.08	10.59	2.43732	0.578845
SYT1	19.32	13	49.86	7.09	5.66	10.59	1.36779	0.578845
GTSCR1	22.51	14.12	207.58	16.53	10.93	24.69	3.20503	0.57884
LOC101929268	42.58	30.69	169.17	21.25	17.33	31.74	1.99023	0.578839
INHBA	41.06	30.69	259.88	25.97	23.35	38.79	2.66204	0.578839
ENKUR	57.48	52.98	528.75	23.61	22.98	35.26	3.20145	0.578634
NOD2	11.26	15.69	99.71	14.17	13.19	21.16	3.14653	0.5785
SNTN	10.35	19.38	72.74	9.45	14.32	14.11	2.81312	0.578332
OSGIN2	15.52	14.68	62.94	9.45	9.8	14.11	2.01985	0.578332
DMC1	18.86	30.24	41.69	9.45	14.69	14.11	1.14437	0.578332
LINC00603	3.05	1.35	56.4	4.73	3.77	7.06	4.20881	0.577828
LINC01488	3.96	4.83	47.41	4.73	6.41	7.06	3.58162	0.577828
DLEU1-AS1	6.09	8.07	65.39	4.73	6.79	7.06	3.42456	0.577828
LRRC58	6.24	3.82	44.14	4.73	5.28	7.06	2.82247	0.577828
CLEC2D	8.07	3.93	42.51	4.73	2.65	7.06	2.39716	0.577828
TNIP3	15.67	16.13	73.56	4.73	5.28	7.06	2.23092	0.577828
SCAMP1	20.08	35.06	43.32	4.73	6.03	7.06	1.10927	0.577828
ARHGAP12	347.58	439.3	934.08	154.17	177.33	229.15	1.4262	0.57177
HHIPL2	24.79	21.62	177.35	22.82	21.47	33.85	2.83877	0.568857
TMED10	163	142.78	399.63	109.34	162.65	162.17	1.29379	0.568686
TCP11	247.84	245.69	548.36	122.71	157.38	181.91	1.14571	0.567972
MDH2	71.77	61.49	340.79	33.83	25.99	50.07	2.24743	0.565643
MIR4713	37.26	43.12	221.47	81.02	121.61	119.87	2.57141	0.565121
PIP4K2A	120.43	142.45	295.84	44.84	74.18	66.28	1.29662	0.563787
ZP4	25.71	49.95	143.84	26.75	28.62	39.49	2.48406	0.561948
LINC00676	26.47	33.49	161.82	13.38	12.06	19.75	2.61196	0.561775
PXDC1	12.78	11.99	88.27	24.39	36.15	35.97	2.78804	0.560504
LINC00601	32.55	18.6	125.04	24.39	10.93	35.97	1.94166	0.560504
SH3BP5	180.64	220.16	375.93	132.93	178.46	196.01	1.05735	0.560261
LRP1B	37.72	24.31	380.83	22.03	15.07	32.44	3.33575	0.558304
ARHGAP5-AS1	38.02	42.67	313.82	52.71	77.19	77.57	3.04511	0.557422
DNPH1	42.89	45.58	194.51	30.68	32.76	45.13	2.18113	0.556788
ZNF365	39.08	55.33	134.85	30.68	42.18	45.13	1.78685	0.556788
GOLGA5	24.94	30.24	200.23	19.67	29	28.92	3.00512	0.556071
DMRTA1	4.88	3.82	100.53	8.66	15.45	12.7	4.3646	0.55239
LOC339622	12.02	13.45	76.01	8.66	10.93	12.7	2.66075	0.55239
MIR3977	26.01	52.64	77.65	8.66	10.55	12.7	1.57792	0.55239
CDRT7	21.45	18.71	62.94	8.66	15.82	12.7	1.553	0.55239
LINC01271	18.1	24.53	42.51	8.66	10.93	12.7	1.23181	0.55239
LINC00922	11.72	15.13	138.12	32.26	29.75	47.25	3.55888	0.550568
KIAA1549L	96.1	93.62	520.57	99.9	119.35	145.96	2.43748	0.547016
NINJ2	17.34	17.14	170.81	21.25	31.26	31.03	3.30022	0.546201
KCNMA1	67.67	101.69	146.29	21.25	25.99	31.03	1.11224	0.546201
NAMA	222.45	191.6	462.55	176.98	188.62	258.06	1.05613	0.54412
EPS15L1	202.07	320.15	436.4	84.17	102.79	122.69	1.1108	0.54364
MACROD2-IT1	3.51	4.71	59.67	6.3	6.41	9.18	4.08746	0.543142
AQP9	5.33	3.71	65.39	6.3	7.16	9.18	3.61686	0.543142
LINC01098	11.41	8.41	88.27	6.3	9.42	9.18	2.95162	0.543142
RFTN2	26.01	20.61	174.08	12.59	10.55	18.34	2.74261	0.542715
DNAH17	29.81	17.03	123.41	12.59	9.05	18.34	2.04959	0.542715
IPO5	106.44	122.74	389.82	31.47	27.49	45.84	1.87277	0.54263
MCTP1	100.21	112.1	354.68	18.89	9.8	27.51	1.82349	0.542333
TAB2	74.05	67.31	328.53	25.18	24.48	36.67	2.14945	0.542322
LAMB3	88.19	63.95	328.53	66.86	90.74	97.31	1.89734	0.541445
COL19A1	56.57	59.81	622.73	41.7	47.82	60.64	3.4605	0.540222
LOC653786	25.55	13	178.98	70.8	94.13	102.95	2.8084	0.540123
PANX3	6.7	5.61	267.24	22.82	24.48	33.15	5.31783	0.53871
GPAM	22.21	17.81	68.66	16.53	25.61	23.98	1.62826	0.536745
KCNMA1-AS1	15.21	21.17	100.53	26.75	49.7	38.79	2.72453	0.536146
SMPX	5.79	7.18	74.38	10.23	9.8	14.82	3.68328	0.534739
MIR4764	20.23	11.88	88.27	10.23	14.69	14.82	2.12543	0.534739
LOC339166	142.78	132.59	746.12	61.36	54.98	88.85	2.38561	0.534073
ERICH3	15.37	10.76	152.01	20.46	16.57	29.62	3.30598	0.533765
KAZN	27.68	33.6	185.52	14.17	16.57	20.46	2.74466	0.529966
KCNC4	36.2	28.79	101.34	14.17	8.67	20.46	1.48514	0.529966
LINC00423	18.41	10.2	100.53	18.1	12.06	26.1	2.44906	0.52806
ATP5J	26.77	31.81	125.04	22.03	29.38	31.74	2.2237	0.526833
SERPINA6	169.99	94.85	743.67	110.12	61	158.65	2.12921	0.526771
ABCA8	76.79	87.24	156.91	67.65	94.51	97.31	1.03095	0.524498
BMP2	1.07	0.57	43.32	3.94	2.27	5.65	5.33935	0.520055
TMEM33	2.14	1.69	52.31	3.94	3.77	5.65	4.6114	0.520055
MREG	3.81	5.38	65.39	3.94	4.53	5.65	4.10121	0.520055
LINC00581	10.04	4.94	228.01	15.74	11.3	22.57	4.50527	0.519971
ADCY8	12.93	13.9	155.28	15.74	14.32	22.57	3.58608	0.519971
APBB1IP	27.38	16.47	80.91	15.74	11.68	22.57	1.5632	0.519971
MIR4634	6.24	3.59	44.96	27.54	38.41	39.49	2.84902	0.519959
CLGN	30.42	30.36	67.02	27.54	18.83	39.49	1.13957	0.519959
FHIT	29.05	13.67	134.03	11.81	14.32	16.93	2.20595	0.519573
TNR	1.99	1.47	47.41	7.88	11.3	11.29	4.57435	0.518778
CSNK1G1	15.97	9.86	113.6	7.88	6.79	11.29	2.83053	0.518778
LINC00457	12.63	10.76	74.38	7.88	13.19	11.29	2.55806	0.518778
LINC00882	23.88	24.31	93.99	7.88	7.54	11.29	1.9767	0.518778
PPM1H	45.93	54.77	299.11	48.77	49.7	69.81	2.70317	0.51744
RGS3	42.89	28.12	125.04	40.91	48.2	58.53	1.54368	0.516723
ADRA1A	13.69	6.5	156.91	36.98	52.72	52.89	3.51874	0.51625
MIR4319	9.74	7.74	71.92	25.18	39.92	35.97	2.8844	0.514516
AQP6	51.55	54.54	104.61	25.18	38.79	35.97	1.02098	0.514516
SLIT1	259.09	188.02	650.51	55.85	54.98	79.68	1.32812	0.51266
RPS6KA2	10.2	10.65	196.96	13.38	14.69	19.05	4.27126	0.509713
AGXT2	24.34	17.48	139.75	13.38	13.19	19.05	2.52145	0.509713
LINC01500	17.95	16.69	144.66	26.75	33.52	38.08	3.01061	0.509495
TMPRSS2	16.13	28.45	146.29	22.82	35.02	32.44	3.18101	0.507475
RPTN	22.06	30.24	72.74	22.82	33.52	32.44	1.72132	0.507475
LINC00996	67.52	88.81	262.34	51.13	69.28	72.63	1.95805	0.506396
BMPER	75.27	97.21	210.03	60.57	66.27	86.03	1.48045	0.506236
DLG5	67.97	35.84	299.11	28.32	23.35	40.2	2.13771	0.505374
H2AFY2	75.27	98.1	174.08	56.64	68.91	80.39	1.2096	0.505195
LL22NC01-81G9.3	19.02	28.45	132.4	37.76	44.06	53.59	2.79931	0.505105
NUP35	5.64	3.48	132.4	9.45	13.19	13.41	4.55306	0.504923
C10orf90	3.81	3.15	75.19	9.45	3.4	13.41	4.30268	0.504923
PPARGC1B	7	5.16	121.77	9.45	8.29	13.41	4.12066	0.504923
LINC00460	8.83	7.51	50.68	9.45	6.03	13.41	2.52093	0.504923
LINC00423	37.26	28.68	173.26	43.27	39.92	61.35	2.21724	0.503696
DAB2IP	98.38	121.39	416.79	43.27	38.41	61.35	2.08288	0.503696
C6orf195	140.5	168.87	369.39	125.85	147.59	178.39	1.39457	0.50333
IGFN1	201.31	125.09	806.6	97.54	111.82	138.2	2.00243	0.502692
FBXL4	77.55	104.26	315.45	39.34	43.3	55.71	2.02421	0.501939
COMMD9	34.52	64.51	86.63	35.4	50.83	50.07	1.32743	0.500197
B. BRD4-gained SEs.
Gene Name	K27ac_proliferating Tag Count	K27ac_quiescent Tag Count	K27ac_senescent Tag Count	BRD4_proliferating Tag Count	BRD4_quiescent Tag Count	BRD4_senescent Tag Count	log2_K27ac_SP	log2_BRD4_SP
KBTBD8	81.2	78.39	1446.48	55.07	62.13	227.04	4.15492	2.04361
GPR68	241.76	165.85	1743.12	112.48	166.79	443.49	2.85002	1.97923
LINC01225	49.73	64.06	1041.96	43.27	34.65	167.11	4.38904	1.94936
POU2F2	268.97	203.47	1001.1	99.9	130.65	229.86	1.89607	1.2022
IL37	134.57	92.84	1607.47	103.04	68.15	236.91	3.57836	1.20113
LOC101927616	306.07	213.89	1725.96	193.5	193.9	411.76	2.49547	1.08947
GRB10	386.8	223.4	1730.87	284.73	365.57	595.07	2.16184	1.06346
ANKRD30A	39.24	27.11	1009.27	52.71	41.05	108.59	4.68484	1.04274
ADO	145.51	118.15	1189.05	65.29	53.47	133.97	3.03062	1.03698
MIR6881	486.7	500.32	1155.55	261.14	330.93	518.22	1.24748	0.988741
LINC00656	352.29	204.59	1792.16	162.03	116.34	314.46	2.34686	0.956616
CCDC130	388.02	173.57	1153.91	134.51	142.32	260.17	1.57233	0.951741
CORO2B	876.23	771.42	2496.59	374.4	472.86	693.78	1.51058	0.889898
EPHA7	42.89	64.51	1045.22	67.65	67.78	124.1	4.60702	0.875341
LINC01080	184.44	155.77	1295.29	69.22	50.46	124.8	2.81205	0.850357
SLC25A37	831.68	760.45	1670.39	271.36	307.97	484.38	1.00608	0.835931
MMP10	341.34	452.29	2370.74	275.29	223.64	490.73	2.79606	0.833977
CD180	112.37	129.01	1147.38	88.89	86.6	153.71	3.35201	0.790118
C9orf92	711.41	423.4	2579.95	372.82	360.67	628.21	1.85859	0.752768
KCNN2	185.5	216.13	1468.54	106.98	85.47	177.68	2.98489	0.73194
TNS3	155.4	140.77	1200.49	128.21	116.34	212.23	2.94956	0.72712
TRIM33	143.39	116.58	1377.83	88.89	57.61	143.14	3.26438	0.687334
IL1B	547.82	486.78	2494.14	305.18	218.74	477.33	2.18677	0.645327
SLC9A9-AS1	221.99	173.91	925.09	60.57	45.94	93.78	2.0591	0.630677
ANGPT2	867.26	831.67	2289.02	380.69	398.7	576.04	1.40019	0.597552
VAC14	267.6	244.68	1087.72	93.61	53.85	138.91	2.02316	0.569416
LOC101927822	267.15	300.89	1431.77	239.11	278.6	353.24	2.42208	0.562974
SOX11	387.87	370.77	1254.43	202.93	183.73	297.54	1.69339	0.552101
LINC00900	519.99	411.08	1240.54	235.18	285.76	344.08	1.25441	0.548979
CITED4	205.87	218.81	972.49	117.99	135.16	172.04	2.23995	0.544079
CXCL8	752.91	721.13	3539.35	357.08	201.79	512.57	2.23294	0.521502
CHST2	198.58	232.25	1123.68	234.39	260.16	335.62	2.50044	0.517918
LINC00477	162.54	173.8	1180.88	184.06	201.42	260.17	2.861	0.499278
XCR1	365.37	369.87	1373.74	188.78	161.89	265.11	1.91068	0.489885
IRAK2	1492.76	747.12	3344.86	564.73	267.31	772.75	1.16396	0.45244
QPCT	465.56	439.97	1582.13	154.17	93	210.82	1.76483	0.45149
NKX2-6	724.49	519.58	1601.75	293.38	134.04	400.48	1.14461	0.44896
